# Supplementary material for: Selective oxidation of unactivated C–H bonds by supramolecular control
Source: Royal Society of Chemistry journal article supplement (doi:10.1039/c2ob07069c), 2012-01-01
Supplement: c2ob07069c.pdf [file c2ob07069c.pdf]

# Selective Oxidation of Unactivated C-H Bonds by Supramolecular Control

*Yat-Sing Fung, Siu-Cheong Yan and Man-Kin Wong\**

State Key Laboratory of Chirosciences and Department of Applied Biology and Chemical Technology,  
The Hong Kong Polytechnic University, Hung Hom, Hong Kong, China.

## SUPPORTING INFORMATION

|                                                                                                                                                            |         |
|------------------------------------------------------------------------------------------------------------------------------------------------------------|---------|
| <b>Table S1</b> Oxidation of Adamantane ( <b>1</b> ) at Different Temperature                                                                              | S2      |
| <b>Table S2</b> Oxidation of <b>1</b> with Different Bases                                                                                                 | S2      |
| <b>Table S3</b> Oxidation of <b>1</b> with Different Amounts of Oxone and NaHCO <sub>3</sub>                                                               | S3      |
| <b>Table S4</b> Effect of Loading of 1,1,1-Trifluoroacetone on Oxidation of <b>1</b>                                                                       | S3      |
| <b>Table S5</b> Oxidation of <b>3a</b> with Different Loading of Oxone and NaHCO <sub>3</sub>                                                              | S4      |
| <b>Table S6</b> Oxidation of <b>3a</b> with Different Amounts of $\beta$ -CD                                                                               | S4      |
| <b>Figure S1</b> LC-MS (ESI+) spectra of $\beta$ -CD ( $m/z = 1135.38$ ) in dioxirane-based oxidation of <b>3a</b>                                         | S5      |
| Calculation of the difference of activation energy for the improvement of the site-selectivity of C-H bond oxidation of <b>3a</b> using Arrhenius equation | S6-S7   |
| Details of <sup>1</sup> H NMR titration experiments and Scott's plot of <b>3a-c</b> and $\beta$ -CD                                                        | S8-S10  |
| <b>Figure S5-S15</b> <sup>1</sup> H NMR titration curves for <b>3a-d</b> and CDs                                                                           | S11-S16 |
| <sup>1</sup> H NMR and <sup>13</sup> C NMR spectra of <b>3a-d</b> , <b>4a-d</b> , and <b>4a'-d'</b>                                                        | S17-S28 |
| <sup>1</sup> H NMR spectra of <b>Table 1</b>                                                                                                               | S29-S33 |
| <sup>1</sup> H NMR spectra of <b>Table 2</b>                                                                                                               | S33-S35 |
| <sup>1</sup> H NMR spectra of <b>Table 3</b>                                                                                                               | S35-S41 |
| <sup>1</sup> H NMR spectra of <b>Table S1</b>                                                                                                              | S42-S43 |
| <sup>1</sup> H NMR spectra of <b>Table S2</b>                                                                                                              | S43-S45 |
| <sup>1</sup> H NMR spectra of <b>Table S3</b>                                                                                                              | S45-S46 |
| <sup>1</sup> H NMR spectra of <b>Table S4</b>                                                                                                              | S47-S48 |
| <sup>1</sup> H NMR spectra of <b>Table S5</b>                                                                                                              | S49-S50 |
| <sup>1</sup> H NMR spectra of <b>Table S6</b>                                                                                                              | S50-S52 |
| Partial contour plot of 600 MHz 2D ROESY spectra for binding of <b>5a-c</b> , and <b>3d</b> to $\beta$ -CD                                                 | S53-S57 |
| Calibration Curve for GC Analysis                                                                                                                          | S58-S59 |
| Chromatogram of C-H bond Oxidation of <b>6a</b> and <b>6b</b>                                                                                              | S60-S67 |

**Table S1.** Oxidation of Adamantane (**1**) at Different Temperature<sup>a</sup>

| Entry    | Temperature (°C) | <b>1</b> : <b>2a</b> : <b>2a'</b> <sup>b</sup> |
|----------|------------------|------------------------------------------------|
| 1        | 0                | 87 : 13 : 0                                    |
| <b>2</b> | <b>25</b>        | <b>48 : 47 : 5</b>                             |
| 3        | 40               | 60 : 33 : 7                                    |

<sup>a</sup> Reactions were carried out by **1** (0.1 mmol) and 1,1,1-trifluoroacetone (0.1 mmol) in H<sub>2</sub>O (1 mL) and CH<sub>3</sub>CN (1.5 mL), with Oxone (0.5 mmol) and NaHCO<sub>3</sub> (1.55 mmol). <sup>b</sup> Determined by <sup>1</sup>H NMR analysis of the crude reaction mixture.

**Table S2.** Oxidation of **1** with Different Bases<sup>a</sup>

| Entry    | Base                            | pH         | <b>1</b> : <b>2a</b> : <b>2a'</b> <sup>b</sup> |
|----------|---------------------------------|------------|------------------------------------------------|
| <b>1</b> | <b>NaHCO<sub>3</sub></b>        | <b>6.9</b> | <b>48 : 47 : 5</b>                             |
| 2        | CaCO <sub>3</sub>               | 6.4        | 44 : 41 : 15                                   |
| 3        | Na <sub>2</sub> CO <sub>3</sub> | 9.0        | 98 : 2 : 0                                     |
| 4        | K <sub>2</sub> CO <sub>3</sub>  | 8.7        | 97 : 3 : 0                                     |
| 5        | Cs <sub>2</sub> CO <sub>3</sub> | 9.1        | 100 : 0 : 0                                    |

<sup>a</sup> Reactions were carried out by **1** (0.1 mmol) and 1,1,1-trifluoroacetone (0.1 mmol) in H<sub>2</sub>O (1 mL) and CH<sub>3</sub>CN (1.5 mL) at room temperature, with Oxone (0.5 mmol) and base (1.55 mmol). <sup>b</sup> Determined by <sup>1</sup>H NMR analysis of the crude reaction mixture.

**Table S3.** Oxidation of **1** with Different Amounts of Oxone and NaHCO<sub>3</sub><sup>a</sup>

| Entry    | Oxone (mmol) | NaHCO <sub>3</sub> (mmol) | Time       | <b>1</b> : <b>2a</b> : <b>2a'</b> <sup>b</sup> |
|----------|--------------|---------------------------|------------|------------------------------------------------|
| 1        | 0.5          | 1.55                      | 2 h        | 48 : 47 : 5                                    |
| 2        | 0.5×2        | 1.55×2                    | 4 h        | 24 : 67 : 9                                    |
| <b>3</b> | <b>0.5×3</b> | <b>1.55×3</b>             | <b>6 h</b> | <b>7 : 50 : 43</b>                             |
| 4        | 0.5×4        | 1.55×4                    | 8 h        | 16 : 59 : 25                                   |
| 5        | 0.25×8       | 0.775×8                   | 8 h        | 12 : 54 : 34                                   |

<sup>a</sup> Reactions were carried out by **1** (0.1 mmol) and 1,1,1-trifluoroacetone (0.1 mmol) in H<sub>2</sub>O (1 mL) and CH<sub>3</sub>CN (1.5 mL) at room temperature, with different amounts of Oxone and NaHCO<sub>3</sub>. <sup>b</sup> Determined by <sup>1</sup>H NMR analysis of the crude reaction mixture.

**Table S4.** Effect of Loading of 1,1,1-Trifluoroacetone on Oxidation of **1**<sup>a</sup>

| Entry    | 1,1,1-trifluoroacetone (equiv) | <b>1</b> : <b>2a</b> : <b>2a'</b> <sup>b</sup> |
|----------|--------------------------------|------------------------------------------------|
| 1        | 2                              | 23 : 52 : 25                                   |
| <b>2</b> | <b>1</b>                       | <b>7 : 50 : 43</b>                             |
| 3        | 0.5                            | 51 : 38 : 11                                   |
| 4        | 0.1                            | 64 : 31 : 5                                    |

<sup>a</sup> Reactions were carried out by **1** (0.1 mmol) and different amounts of 1,1,1-trifluoroacetone in H<sub>2</sub>O (1 mL) and CH<sub>3</sub>CN (1.5 mL) at room temperature with Oxone (0.5 mmol × 3) and NaHCO<sub>3</sub> (1.55 mmol × 3). (total reaction time: 6 h).

<sup>b</sup> Determined by <sup>1</sup>H NMR analysis of the crude reaction mixture.

**Table S5.** Oxidation of **3a** with Different Loading of Oxone and NaHCO<sub>3</sub><sup>a</sup>

| Entry                | Oxone (mmol) | NaHCO <sub>3</sub> (mmol) | Time       | <b>3a</b> : <b>4a</b> : <b>4a'</b> <sup>b</sup> |
|----------------------|--------------|---------------------------|------------|-------------------------------------------------|
| 1                    | 1×4          | 3.1×4                     | 8 h        | 69 : 27 : 4                                     |
| <b>2<sup>c</sup></b> | <b>0.5×8</b> | <b>1.55×8</b>             | <b>8 h</b> | <b>44 : 48 : 8</b>                              |

<sup>a</sup> Reactions were carried out by **3a** (0.2 mmol) and 1,1,1-trifluoroacetone (0.2 mmol) in H<sub>2</sub>O (4 mL) and CH<sub>3</sub>CN (6 mL) at room temperature with Oxone (1 mmol × 4) and NaHCO<sub>3</sub> (3.1 mmol × 4). <sup>b</sup> Determined by <sup>1</sup>H NMR analysis of the crude reaction mixture. <sup>c</sup> The reaction was conducted with Oxone (0.5 mmol × 8) and NaHCO<sub>3</sub> (1.55 mmol × 8).

**Table S6.** Oxidation of **3a** with Different Amounts of β-CD<sup>a</sup>

| Entry    | β-CD (equiv) | Conversion (%) <sup>b</sup> | Yield (%) <sup>c</sup> | <b>4a</b> : <b>4a'</b> <sup>d</sup> |
|----------|--------------|-----------------------------|------------------------|-------------------------------------|
| 1        | 0.1          | 23                          | 40                     | 7 : 1                               |
| 2        | 0.5          | 32                          | 50                     | 8 : 1                               |
| <b>3</b> | <b>1.1</b>   | <b>40</b>                   | <b>71</b>              | <b>20 : 1</b>                       |
| 4        | 2            | 34                          | 42                     | 25 : 1                              |
| 5        | 5            | 49                          | 20                     | 29 : 1                              |
| 6        | 10           | 47                          | 29                     | 30 : 1                              |

<sup>a</sup> Reactions were conducted with **3a** (0.2 mmol), 1,1,1-trifluoroacetone (0.2 mmol) and different loadings of β-CD in H<sub>2</sub>O (10 mL) at room temperature with Oxone (0.5 mmol × 8) and NaHCO<sub>3</sub> (1.55 mmol × 8). <sup>b</sup> Conversion was calculated from the amount of substrate recovered by flash column chromatography. <sup>c</sup> Yield based on conversion. <sup>d</sup> Determined by <sup>1</sup>H NMR.

**Figure S1.** LC-MS (ESI+) spectra of  $\beta$ -CD ( $m/z = 1135.38$ ) in dioxirane-based oxidation of **3a**

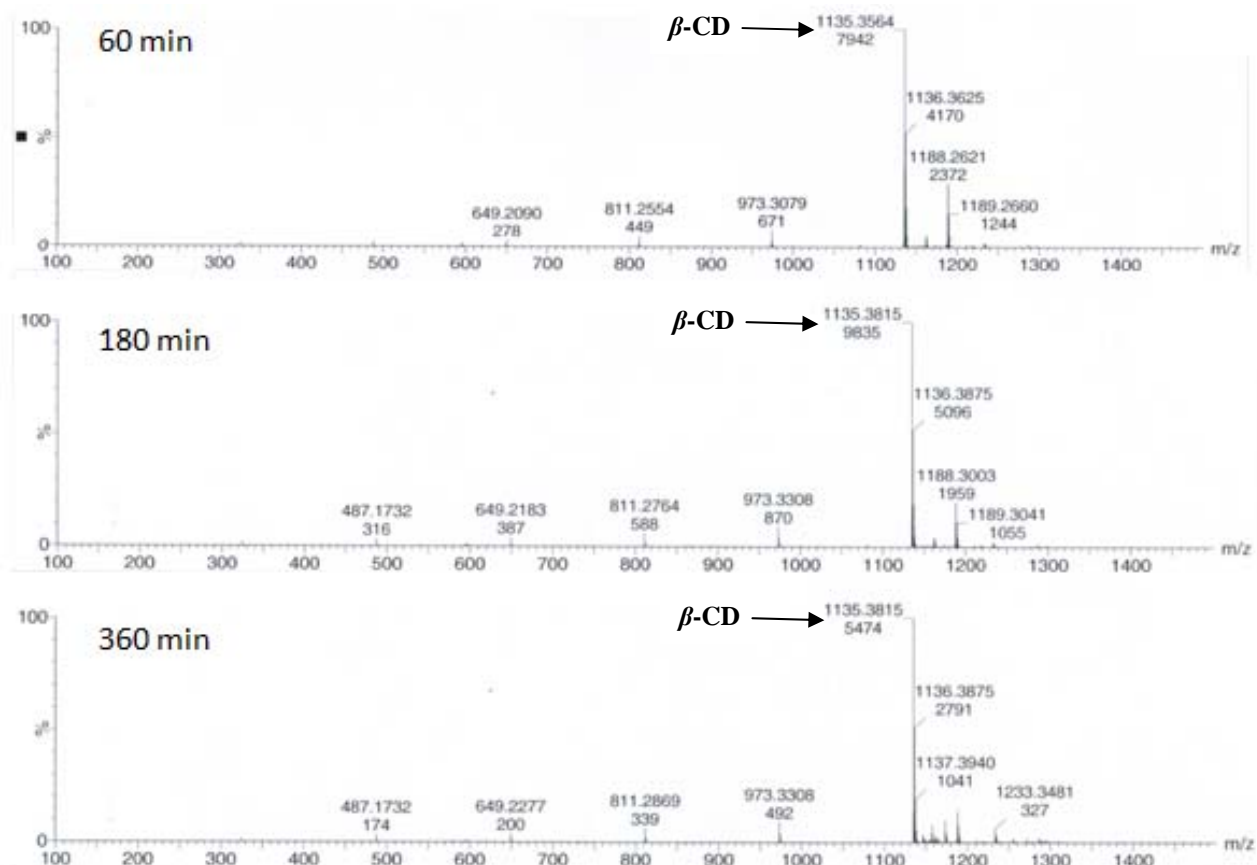

### Calculation of the difference of activation energy for the improvement of the site-selectivity of C-H bond oxidation of **3a** using Arrhenius equation ( $\ln k = -(E_a/RT) + \ln A$ )

The calculation was based on two assumptions. (i) There is no change in  $\Delta S$ . (ii) The activation energy for the formation of **4a** remains unchanged, and the activation energy for the formation of **4a'** is increased due to the induced steric hindrance by  $\beta$ -CD. The steps of calculation were shown as follows:

Let the Arrhenius equation for the C-H bond oxidation of **3a** in a mixture of H<sub>2</sub>O and CH<sub>3</sub>CN be:

$$\ln k_1 = -(E_{a1}/RT) + \ln A \quad (1)$$

And let the Arrhenius equation for the C-H bond oxidation of **3a** in H<sub>2</sub>O with  $\beta$ -CD be:

$$\ln k_2 = -(E_{a2}/RT) + \ln A \quad (2)$$

where  $k_1$  and  $k_2$  are the rate constants for the C-H bond oxidation of **3a** in a mixture of H<sub>2</sub>O and CH<sub>3</sub>CN and that in H<sub>2</sub>O with  $\beta$ -CD, respectively;  $E_{a1}$  and  $E_{a2}$  are the activation energies for the C-H bond oxidation of **3a** in a mixture of H<sub>2</sub>O and CH<sub>3</sub>CN and that in H<sub>2</sub>O with  $\beta$ -CD, respectively; R is gas constant (1.987 cal K<sup>-1</sup> mol<sup>-1</sup>); T is absolute temperature, assumed to be 298 K; A is the pre-exponential factor.

The difference of  $E_{a1}$  and  $E_{a2}$  is calculated by (1) - (2):

$$\ln k_1 - \ln k_2 = \left[ -\left(\frac{E_{a1}}{RT}\right) + \ln A \right] - \left[ -\left(\frac{E_{a2}}{RT}\right) + \ln A \right]$$

$$\ln\left(\frac{k_1}{k_2}\right) = \frac{E_{a2} - E_{a1}}{RT} \quad (3)$$

The C-H bond oxidation of **3a** in a mixture of H<sub>2</sub>O and CH<sub>3</sub>CN gave **4a** and **4a'** in the ratio of 1 : 1/7, and the C-H bond oxidation of **3a** in H<sub>2</sub>O with  $\beta$ -CD gave **4a** and **4a'** in the ratio of 1 : 1/20.

Therefore,

$$\ln\left(\frac{k_1}{k_2}\right) = \ln\frac{1}{\frac{1}{20}} = \ln 2.857 \quad (4)$$

Substitute (4) into (3):

$$\begin{aligned} \ln 2.857 &= \frac{E_{a2} - E_{a1}}{RT} \\ E_{a2} - E_{a1} &= RT \ln 2.857 \end{aligned}$$

$$E_{a_2} - E_{a_1} = 1.987 \text{ cal K}^{-1}\text{mol}^{-1} \times 298\text{K} \times \ln 2.857$$
$$E_{a_2} - E_{a_1} = 0.622 \text{ kcal mol}^{-1}$$

Therefore, the difference in the activation energy for the improvement of the site-selectivity of C-H bond oxidation of **3a** is 0.622 kcal mol<sup>-1</sup>.

### Details of $^1\text{H}$ NMR titration experiments and Scott's plots of **3a-c**

The mixtures of **3a-c** and  $\beta$ -CD for the  $^1\text{H}$  NMR titration experiments were prepared by mixing indicated volume of (i) **3a-c** stock solutions (0.5 M, 0.25 mmol of **3a-c** in 0.5 mL of  $\text{D}_6$ -acetone), (ii)  $\beta$ -CD stock solution (0.01 M, 0.1 mmol of  $\beta$ -CD in 10 mL of  $\text{D}_2\text{O}$ ), and (iii)  $\text{D}_2\text{O}$  according to the following table. The final volumes of the mixtures were  $\sim 0.5$  mL.

| Entry | Ratio of <b>3a-c</b> : $\beta$ -CD | Volume of <b>3a-c</b><br>stock solutions ( $\mu\text{L}$ ) | Volume of $\beta$ -CD<br>stock solution (mL) | Volume of<br>$\text{D}_2\text{O}$ (mL) |
|-------|------------------------------------|------------------------------------------------------------|----------------------------------------------|----------------------------------------|
| 1     | 0 : 10                             | 0                                                          | 0.50                                         | 0                                      |
| 2     | 1 : 9                              | 1                                                          | 0.45                                         | 0.05                                   |
| 3     | 2 : 8                              | 2                                                          | 0.40                                         | 0.10                                   |
| 4     | 3 : 7                              | 3                                                          | 0.35                                         | 0.15                                   |
| 5     | 4 : 6                              | 4                                                          | 0.30                                         | 0.20                                   |
| 6     | 5 : 5                              | 5                                                          | 0.25                                         | 0.25                                   |
| 7     | 5.5 : 4.5                          | 6                                                          | 0.25                                         | 0.25                                   |
| 8     | 6 : 4                              | 6                                                          | 0.20                                         | 0.30                                   |
| 9     | 6.7 : 3.3                          | 6                                                          | 0.15                                         | 0.35                                   |
| 10    | 7 : 3                              | 7                                                          | 0.15                                         | 0.35                                   |

Remarks: In general, the mixtures with high ratio of  $\beta$ -CD are opaque and viscous (entries 1-7) while transparent solutions are observed in the mixtures with low ratio of  $\beta$ -CD (entries 8-10).

The mixtures were subjected to  $^1\text{H}$  NMR analysis. The changes of the chemical shift of H3 of  $\beta$ -CD (with the chemical shift of H4 of  $\beta$ -CD as the internal reference) are obtained as  $\Delta\delta_{\text{obs}}$  which is used for the calculation of the binding constant.

The binding constants (K) of **3a-c** to  $\beta$ -CD were calculated by fitting  $\Delta\delta_{\text{obs}}$  into Scott's plot as the equation shown below (R. L. Scott, *Recl. Trav. Chim. Pays-Bas*, 1956, **75**, 787):

$$[\mathbf{3a-c}] / \Delta\delta_{\text{obs}} = [\mathbf{3a-c}] / \Delta\delta_{\text{max}} + \Delta\delta_{\text{max}} / K$$

where  $[\mathbf{3a-c}]$  is the concentration of **3a-c** with normalized concentration of  $\beta$ -CD,  $\Delta\delta_{\text{obs}}$  is the observed change of the chemical shift of H3 of  $\beta$ -CD at different concentrations of **3a-c**,  $\Delta\delta_{\text{max}}$  is the maximum change of the chemical shift of H3 of  $\beta$ -CD.



**Figure S2.** Scott's plot of  $^1\text{H}$  NMR titration of **3a** and  $\beta$ -CD

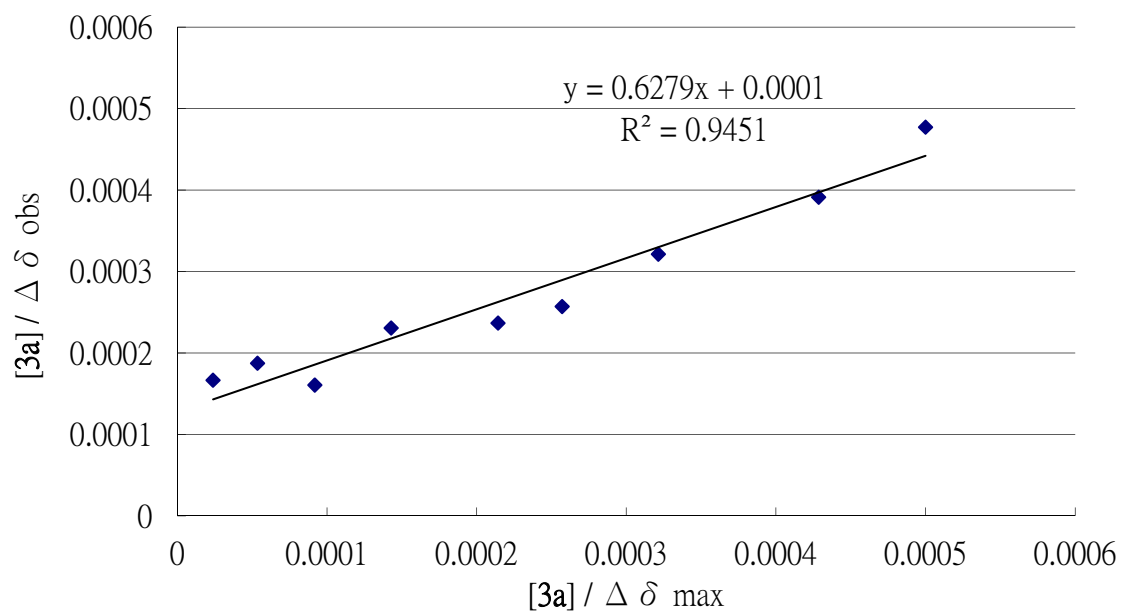

**Figure S3.** Scott's plot of  $^1\text{H}$  NMR titration of **3b** and  $\beta$ -CD

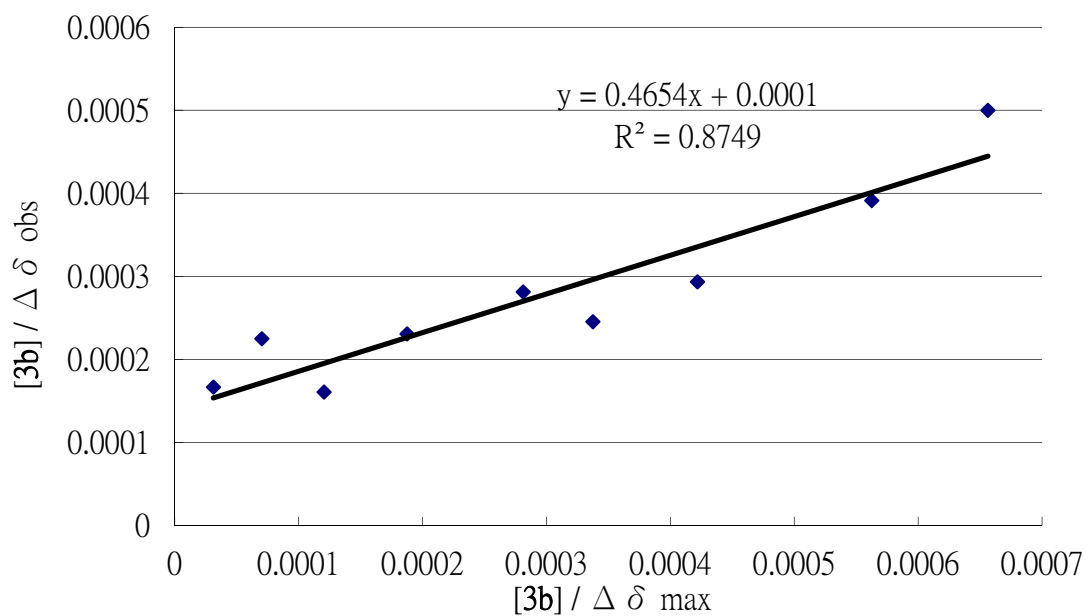

**Figure S4.** Scott's plot of  $^1\text{H}$  NMR titration of **3c** and  $\beta$ -CD

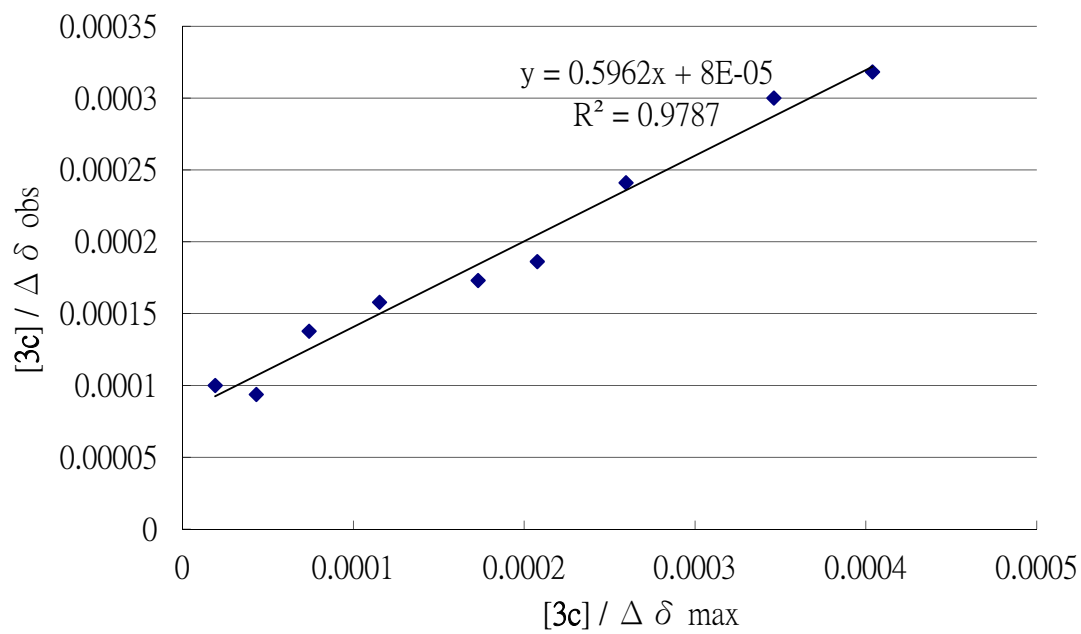

**Figure S5.**  $^1\text{H}$  NMR titration curve for **3b** and  $\beta\text{-CD}$

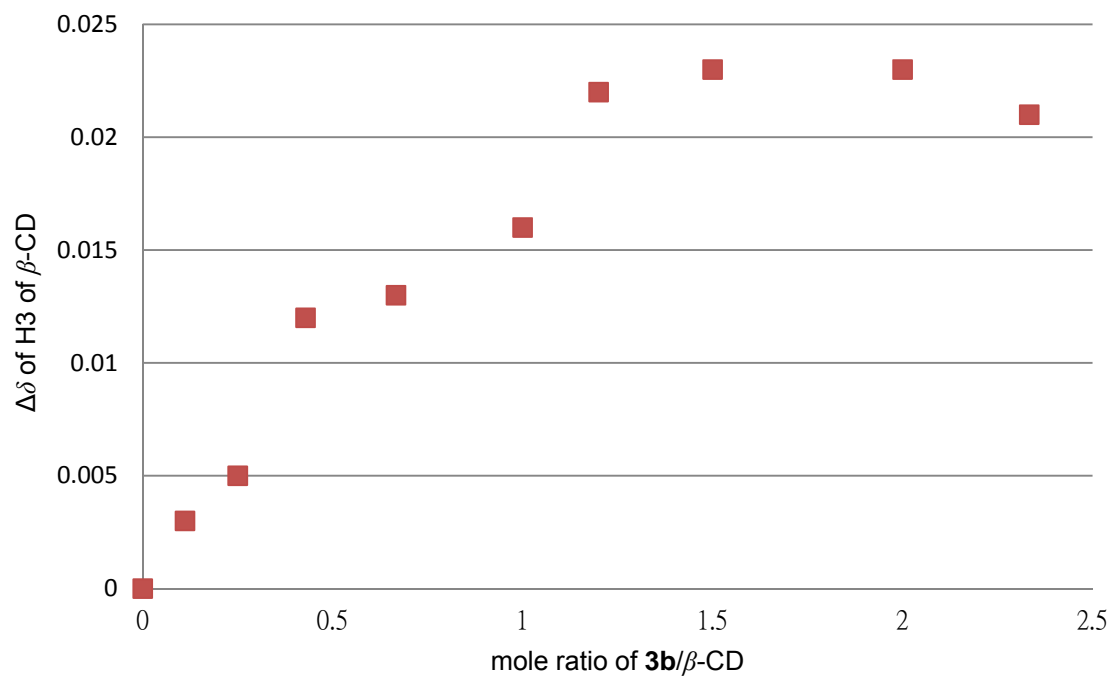

**Figure S6.**  $^1\text{H}$  NMR titration curve for **3c** and  $\beta\text{-CD}$

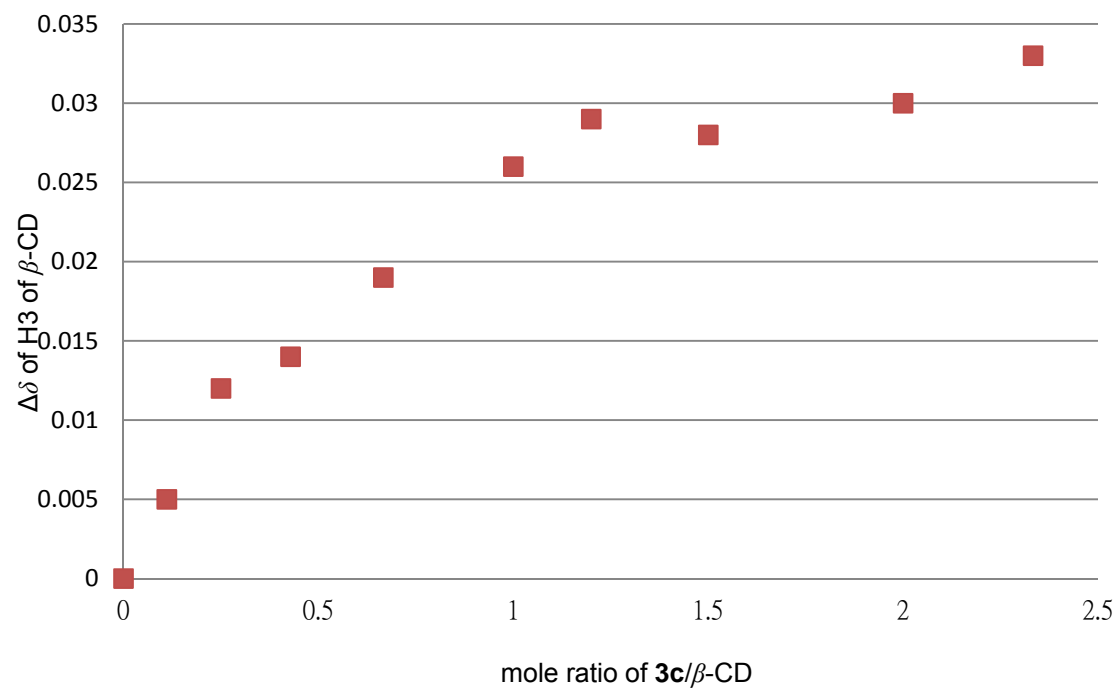

**Figure S7.**  $^1\text{H}$  NMR titration curve for **3d** and  $\beta$ -CD

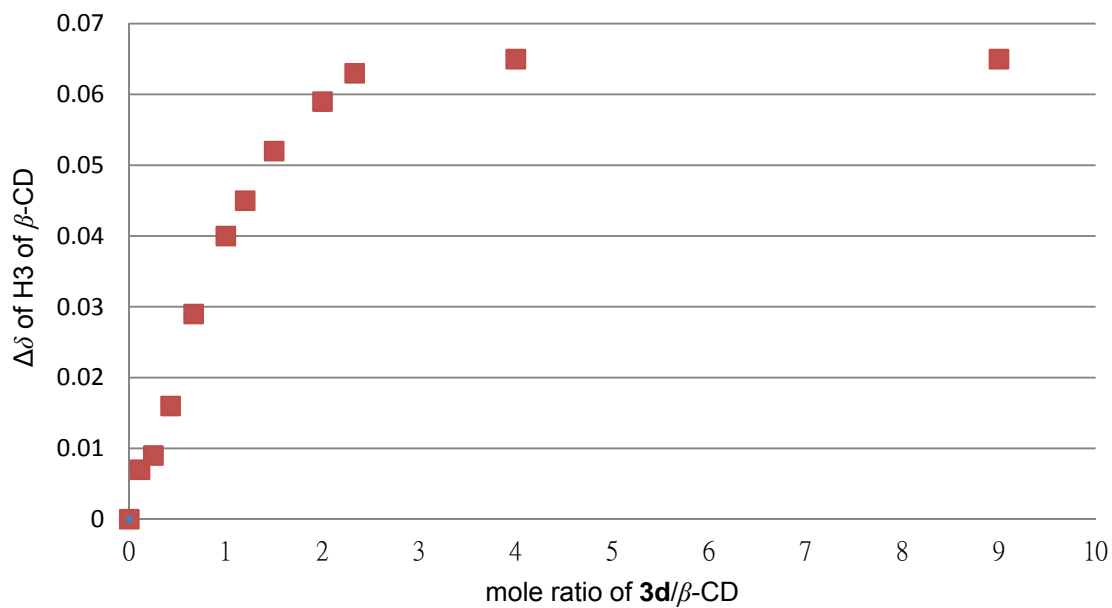

**Figure S8.**  $^1\text{H}$  NMR titration curve for **3a** and  $\alpha$ -CD

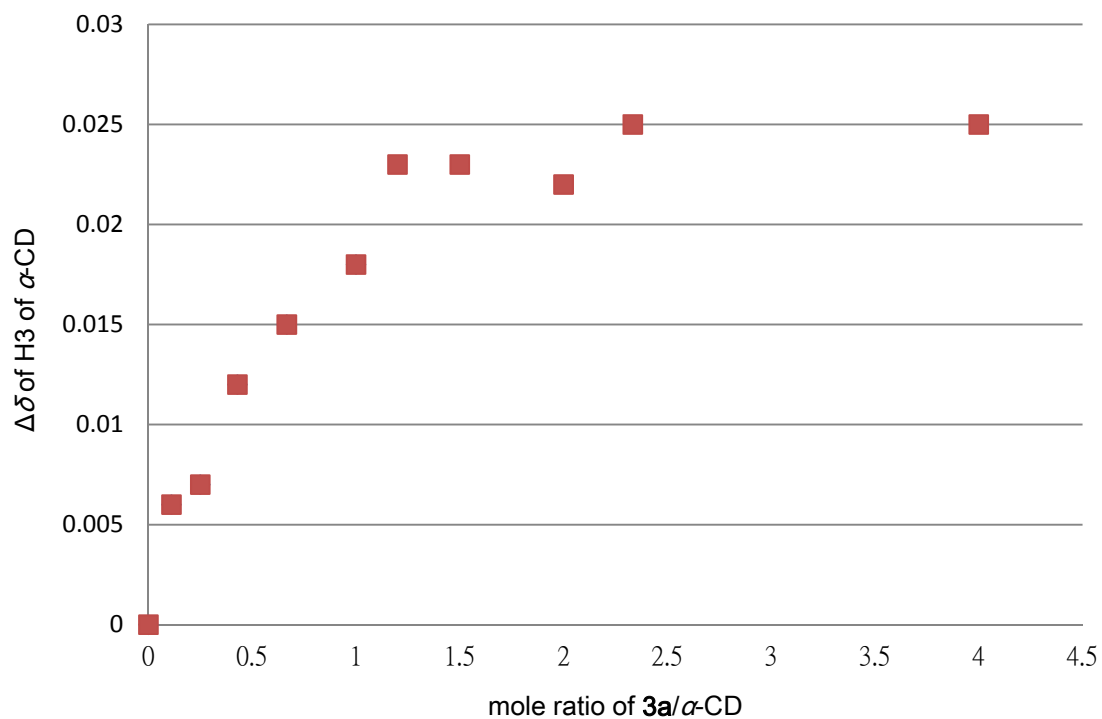

**Figure S9.**  $^1\text{H}$  NMR titration curve for **3b** and  $\alpha$ -CD

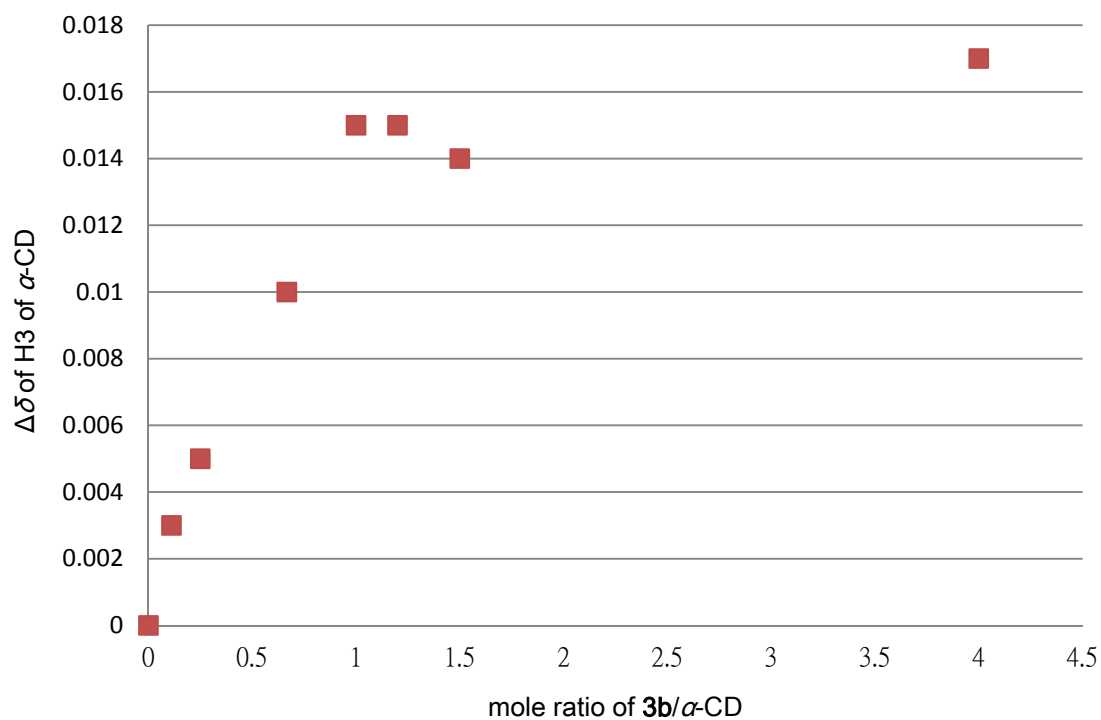

**Figure S10.**  $^1\text{H}$  NMR titration curve for **3c** and  $\alpha$ -CD

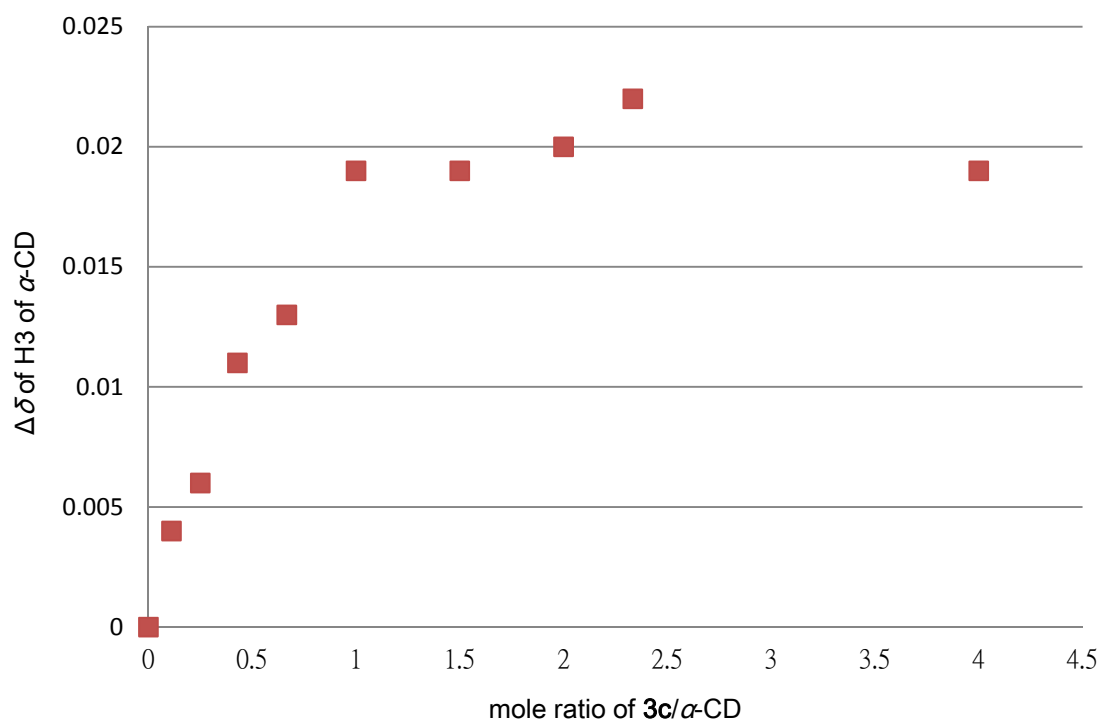

**Figure S11.**  $^1\text{H}$  NMR titration curve for **3d** and  $\alpha$ -CD

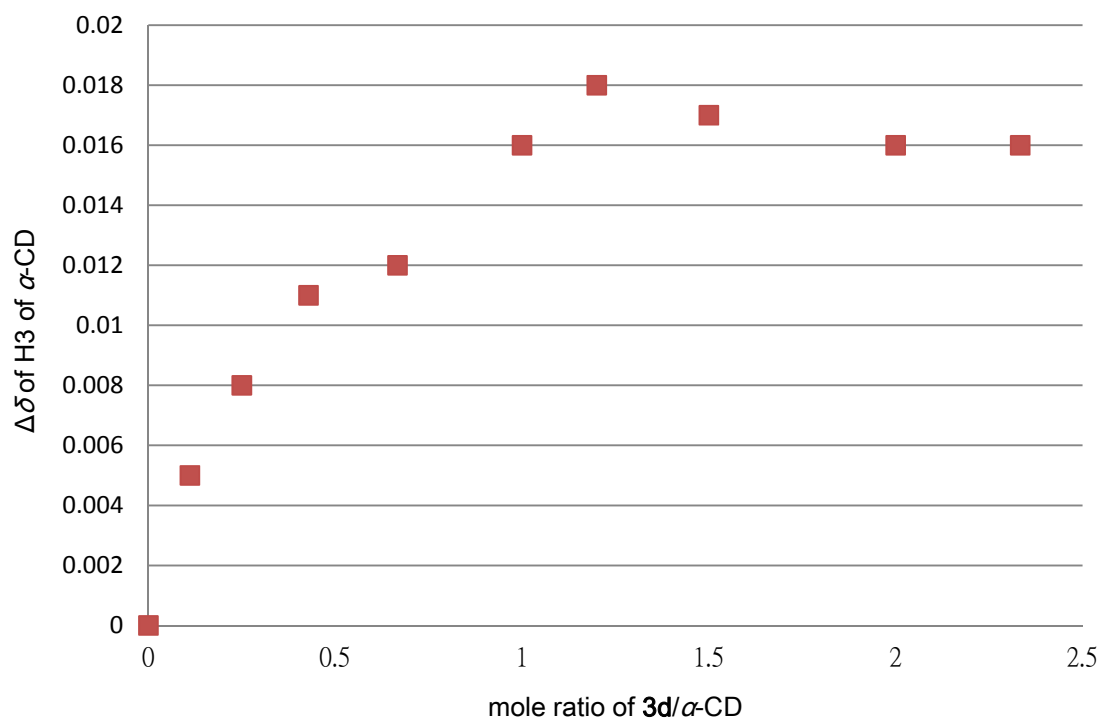

**Figure S12.**  $^1\text{H}$  NMR titration curve for **3a** and  $\gamma$ -CD

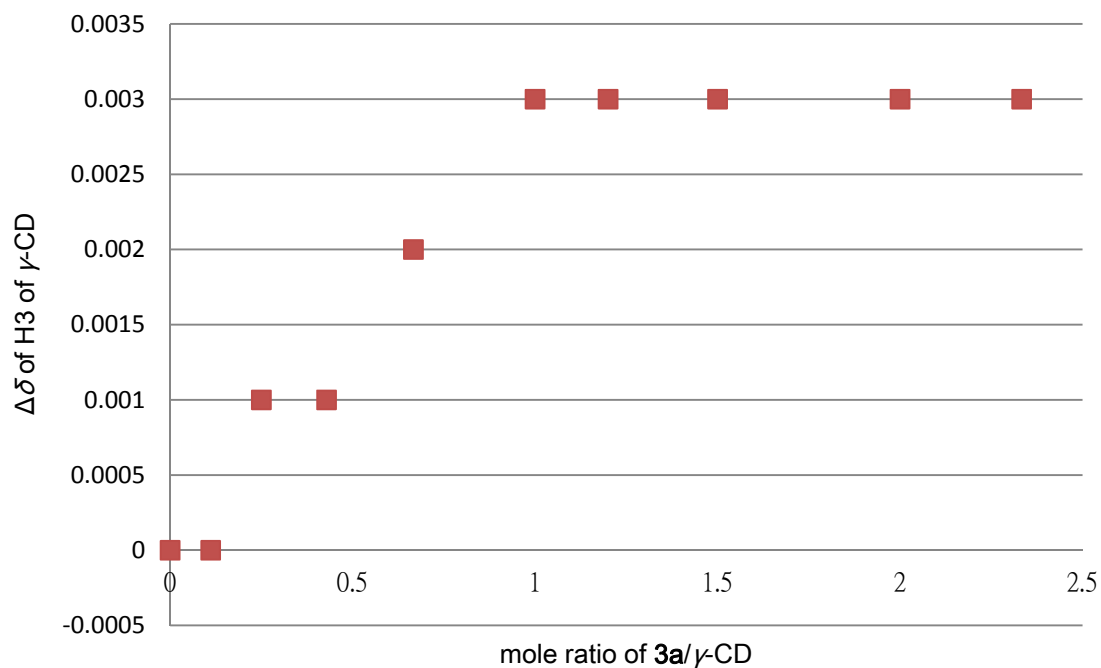

**Figure S13.**  $^1\text{H}$  NMR titration curve for **3b** and  $\gamma$ -CD

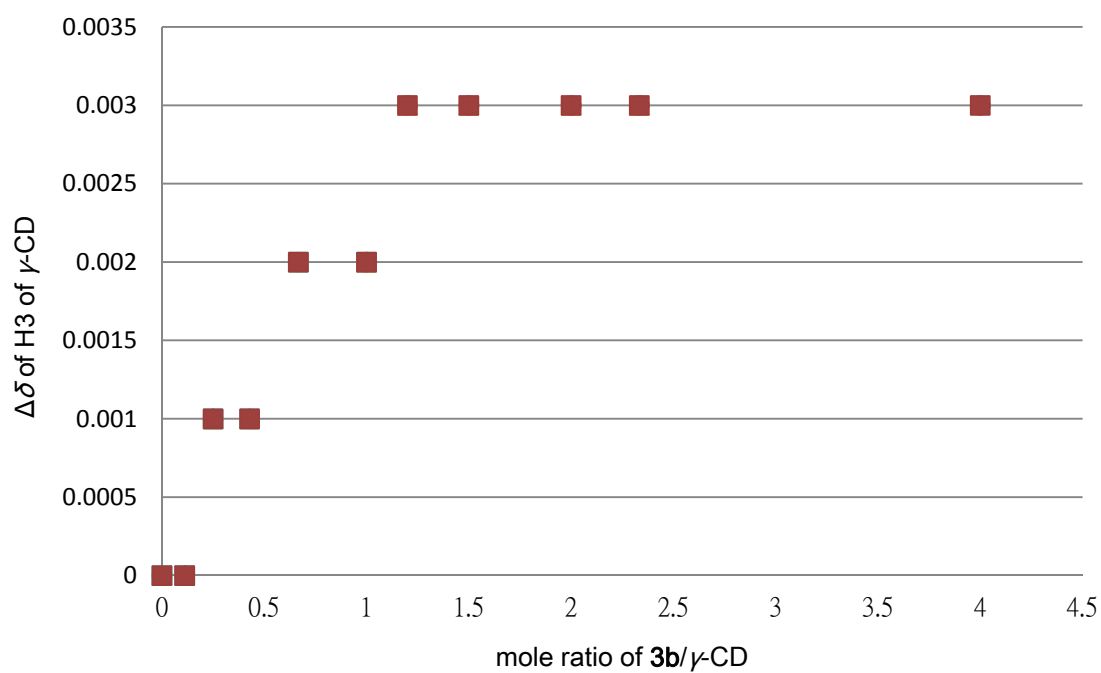

**Figure S14.**  $^1\text{H}$  NMR titration curve for **3c** and  $\gamma$ -CD

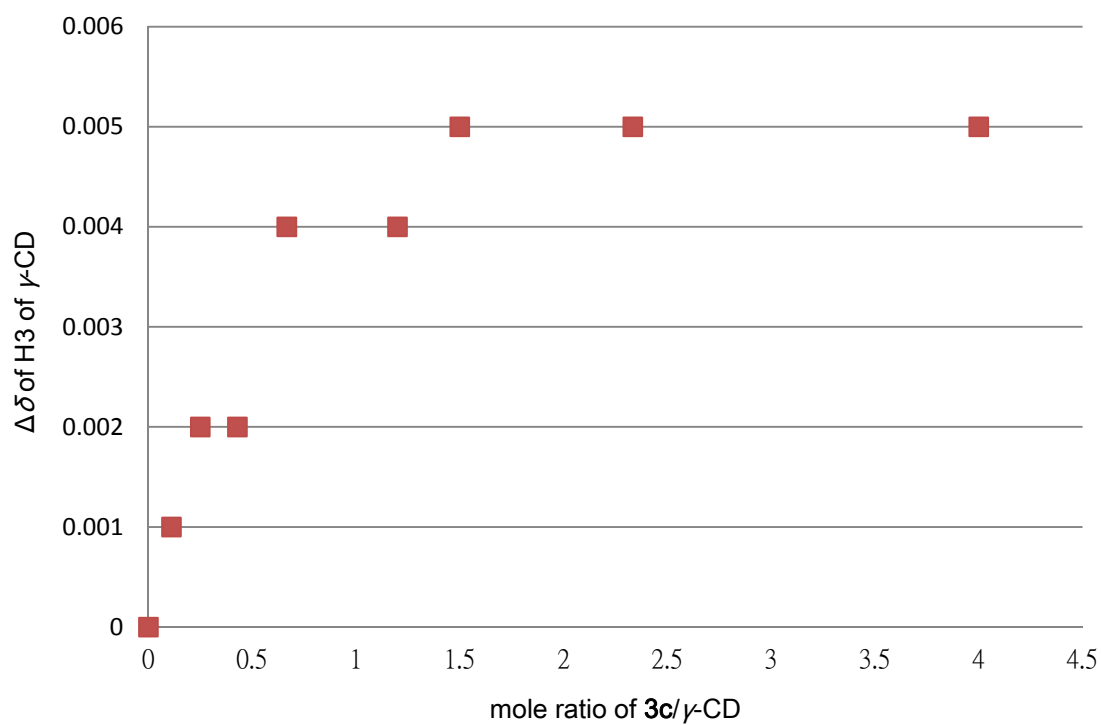

**Figure S15.**  $^1\text{H}$  NMR titration curve for **3d** and  $\gamma$ -CD

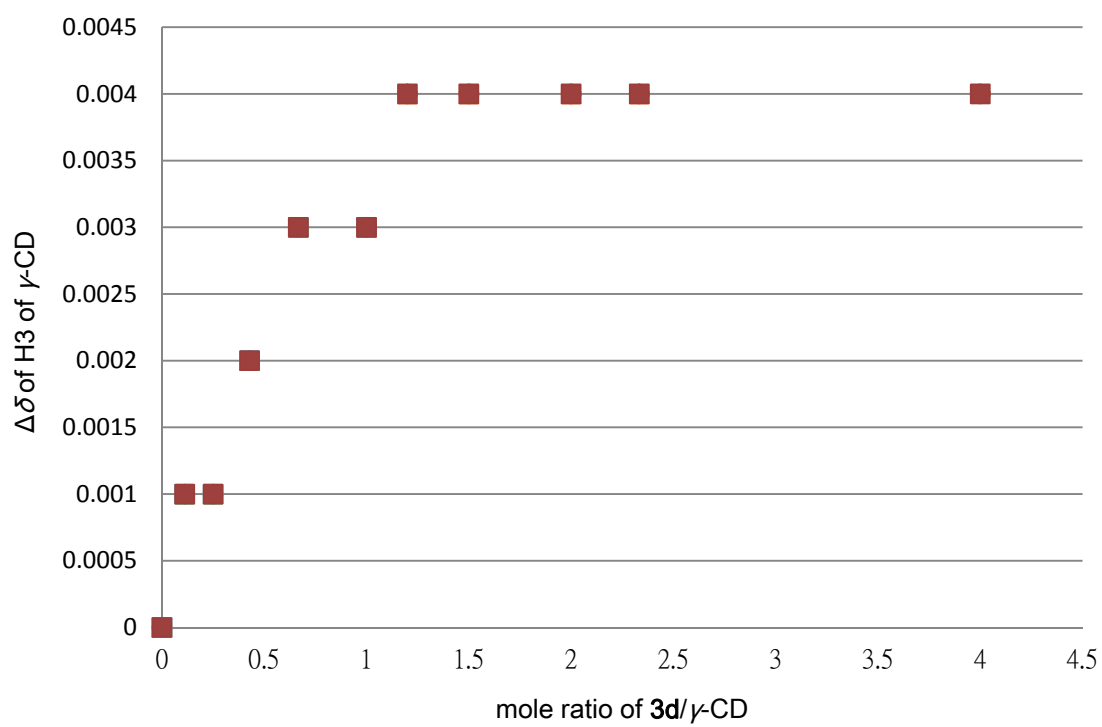



### 3,7-dimethyloctyl benzoate (3a)

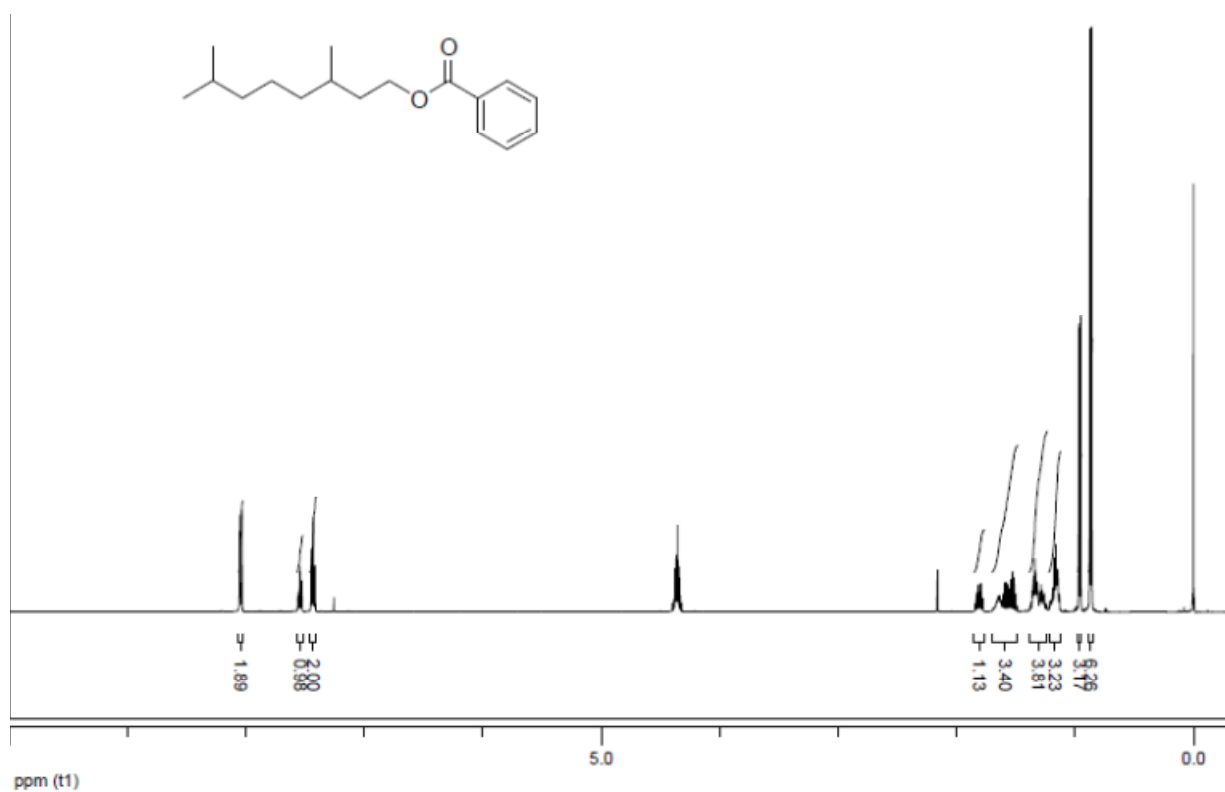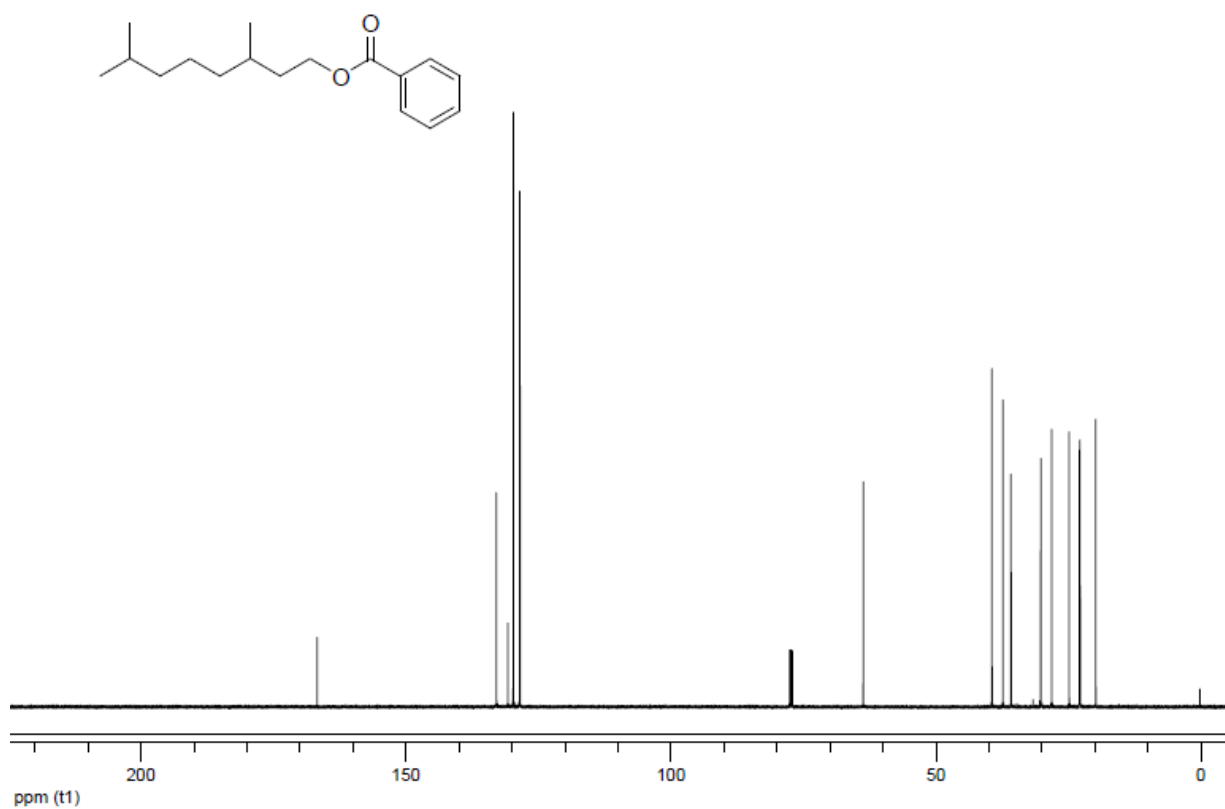

### 3,7-dimethyloctyl 4-*tert*-butylbenzoate (3b)

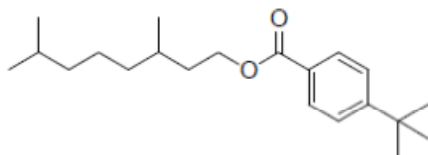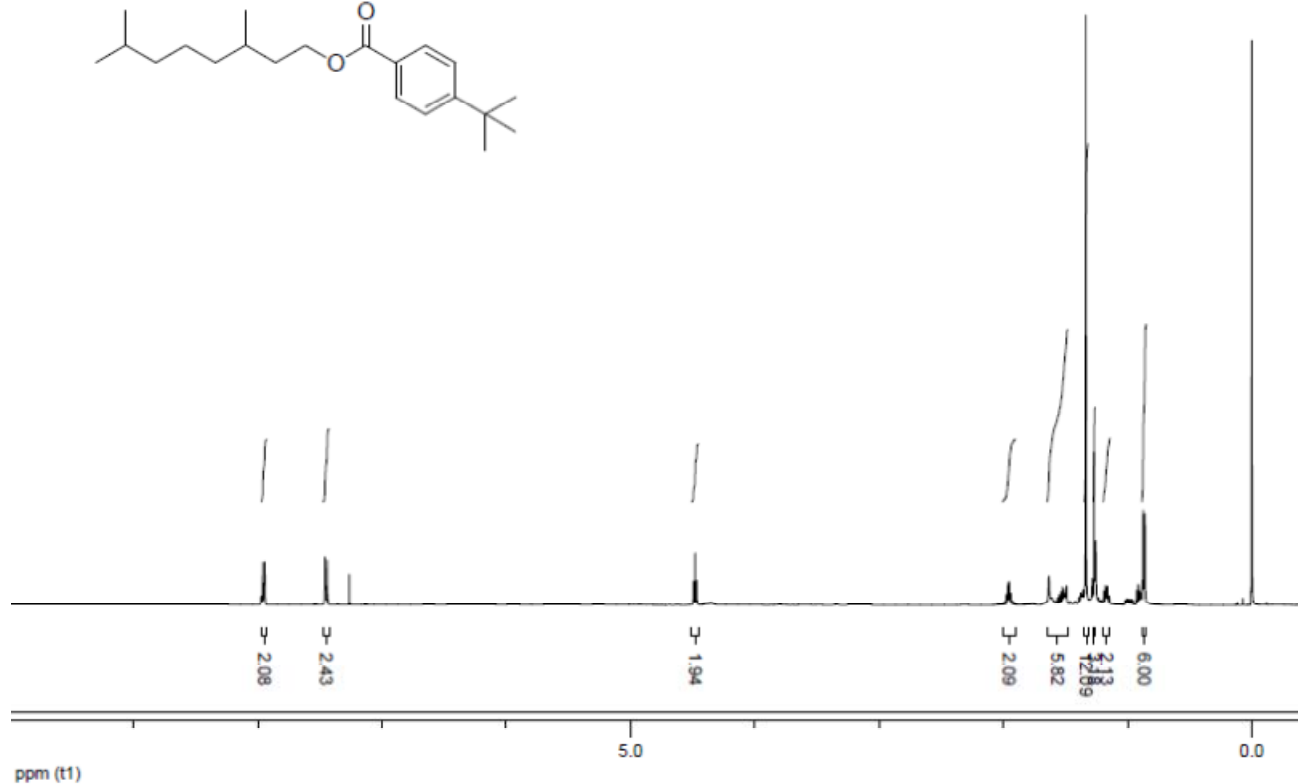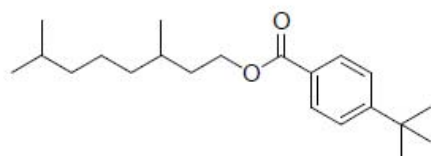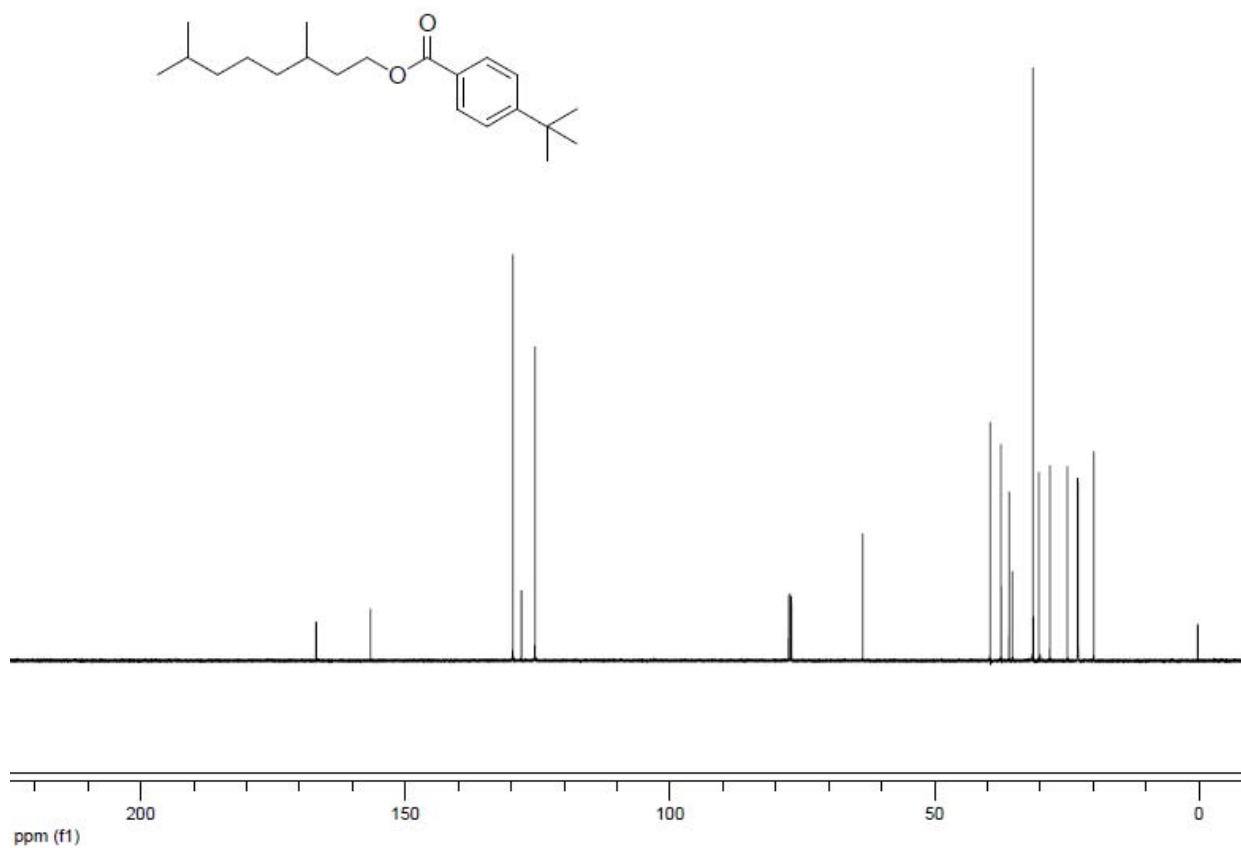

### 3,7-dimethyloctyl pivalate (3c)

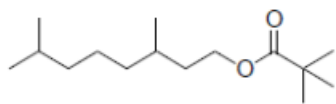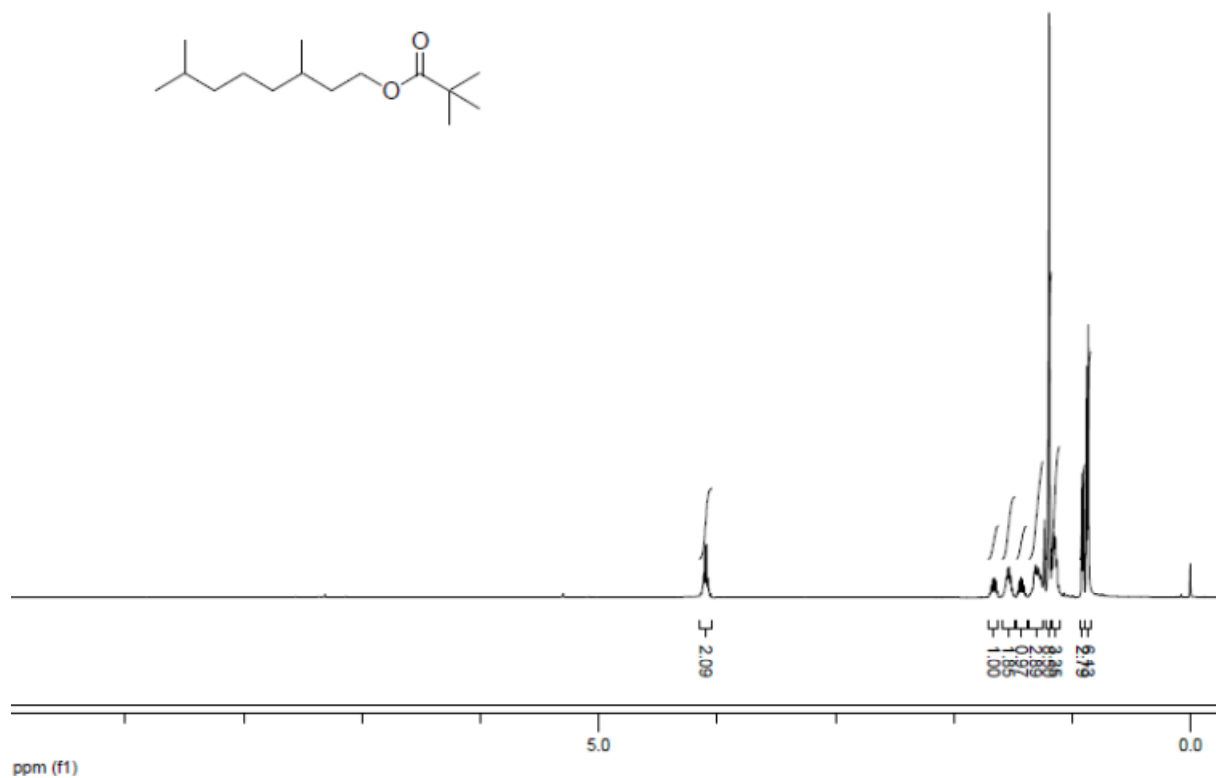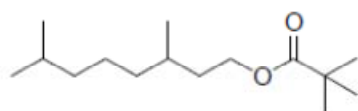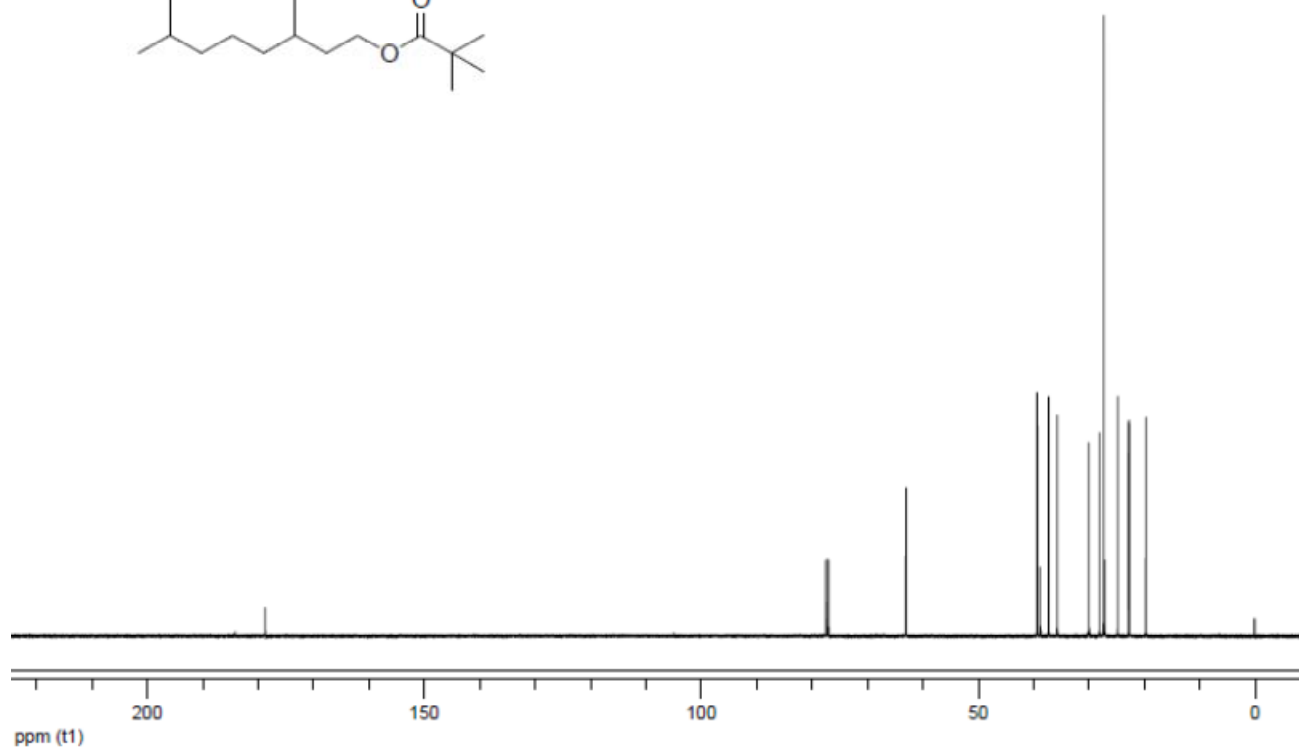

### 3,7-dimethyloctyl acetate (3d)

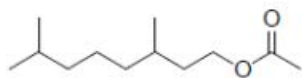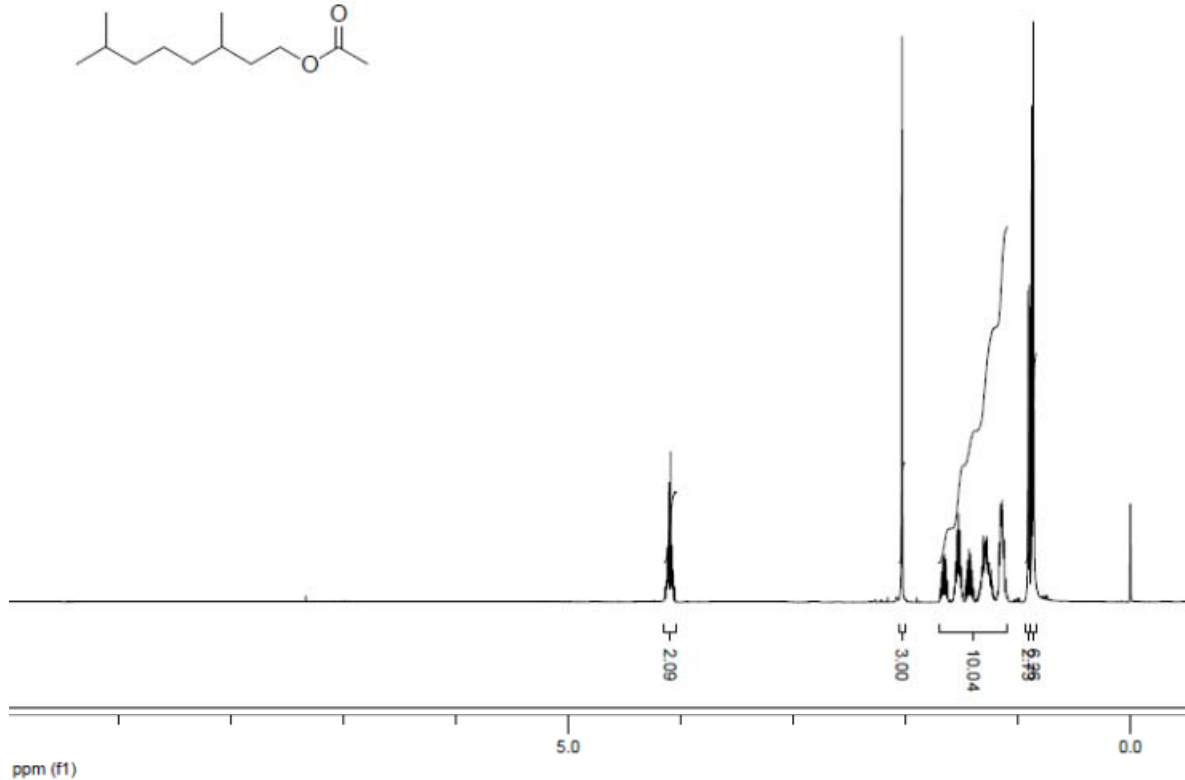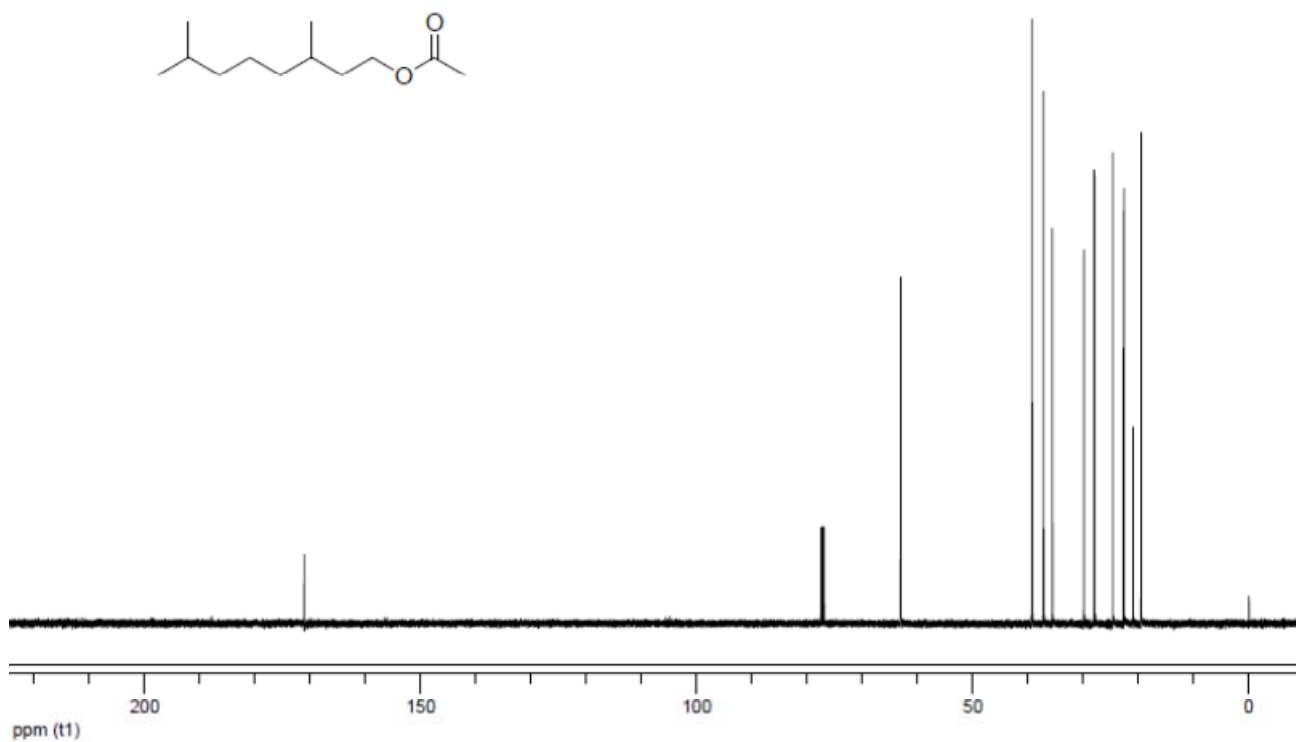

### 7-hydroxy-3,7-dimethyloctyl benzoate (4a)

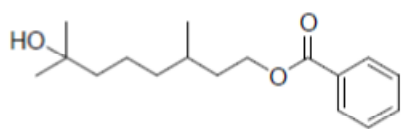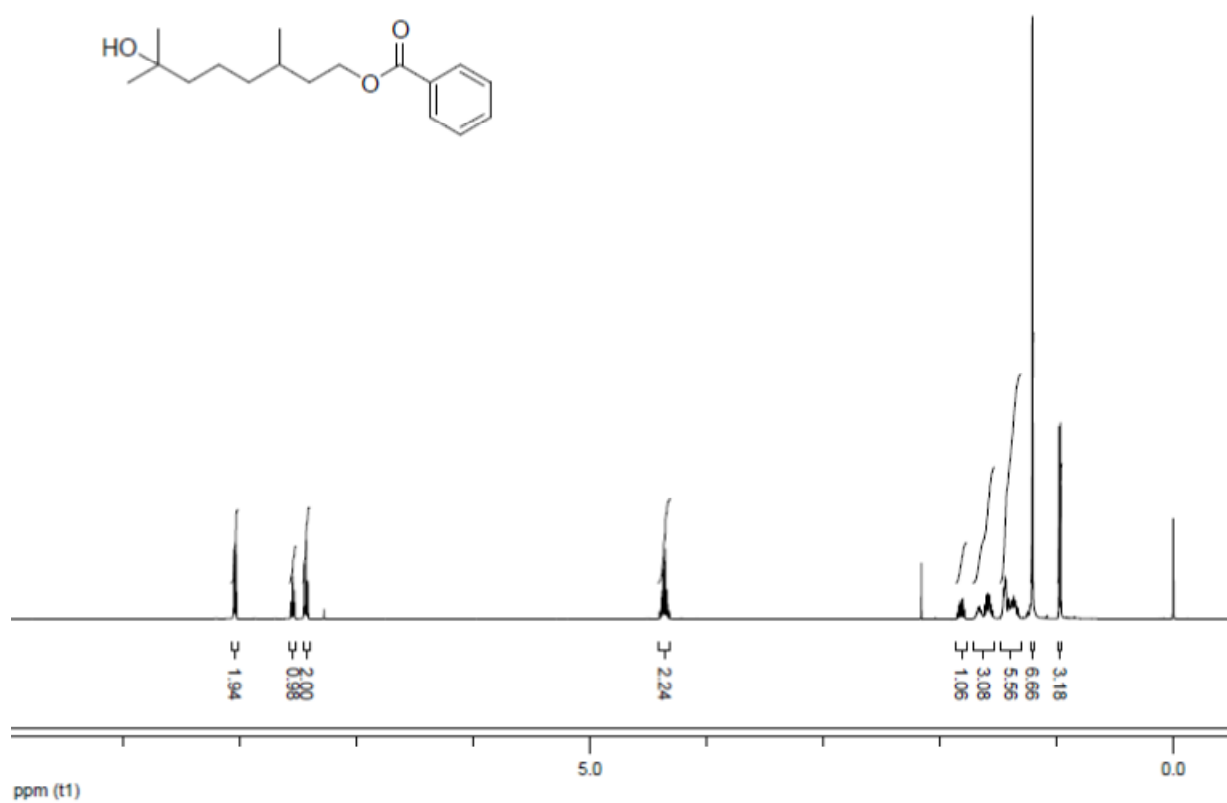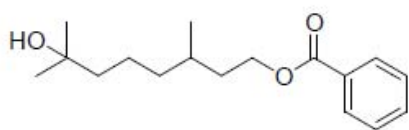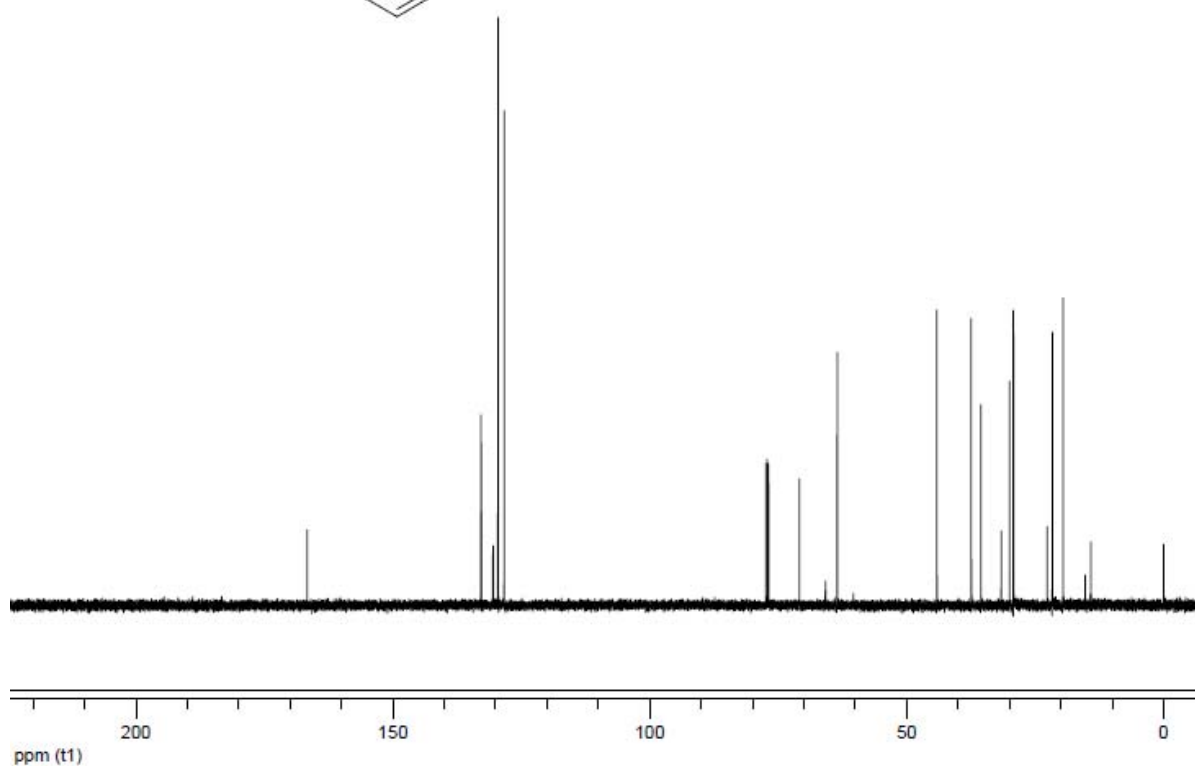

### 3-hydroxy-3,7-dimethyloctyl benzoate (4a')

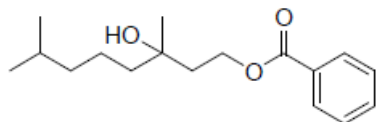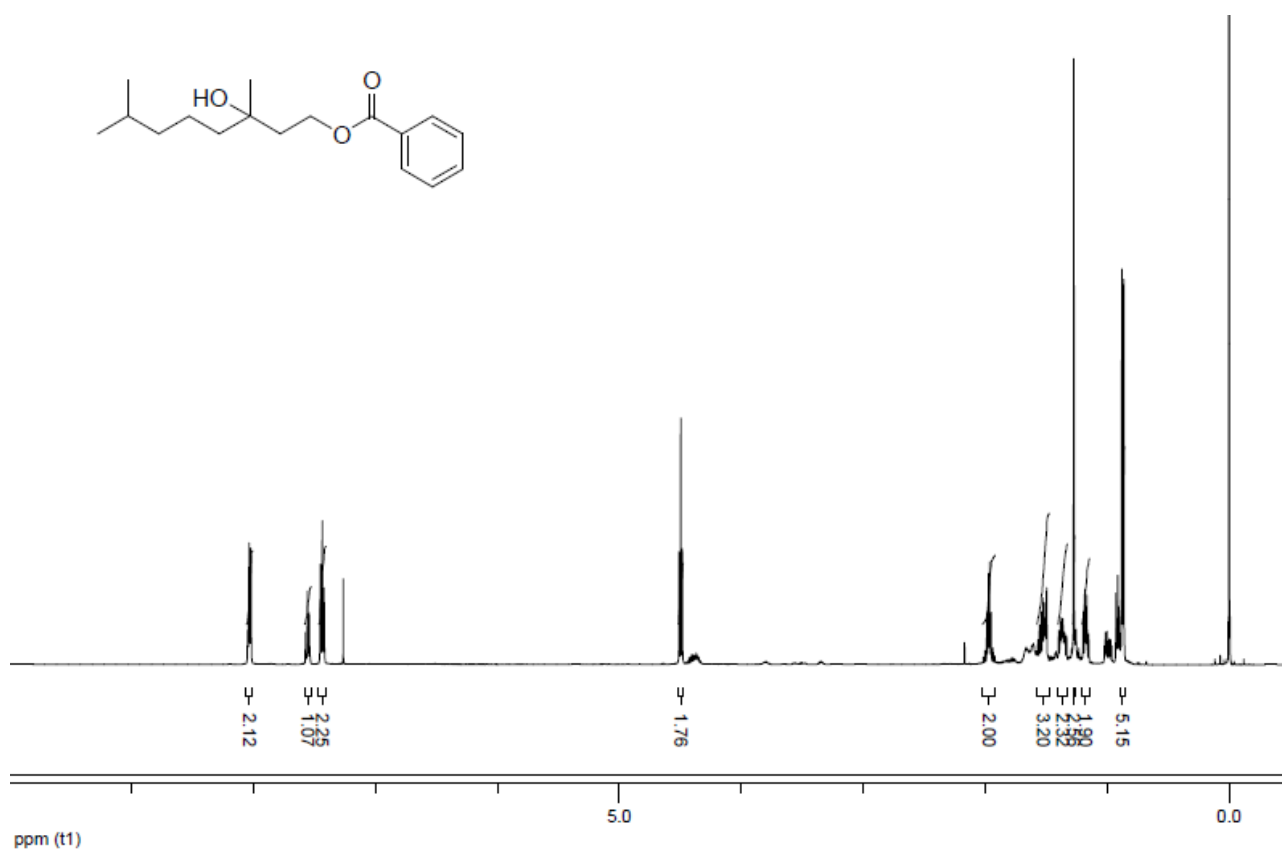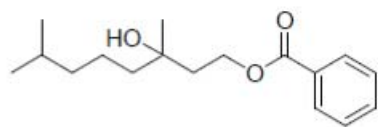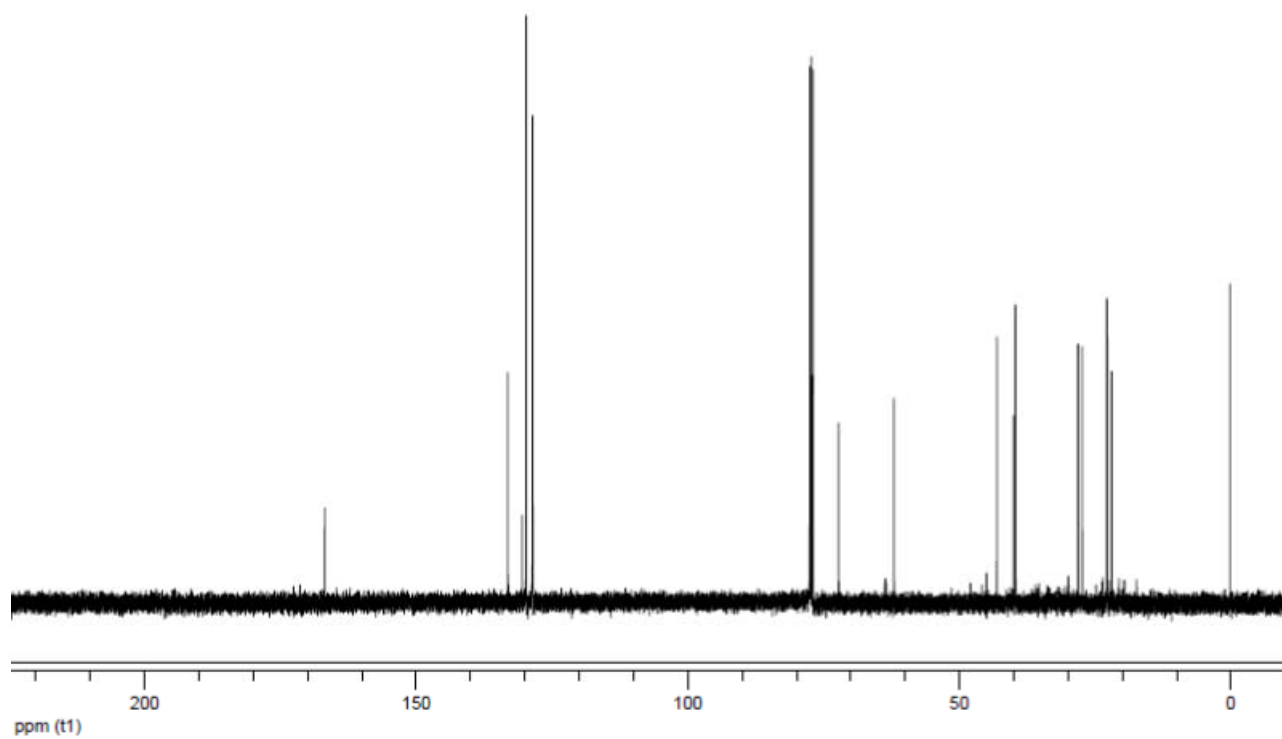



### 3-hydroxy-3,7-dimethyloctyl 4-*tert*-butylbenzoate (4b')

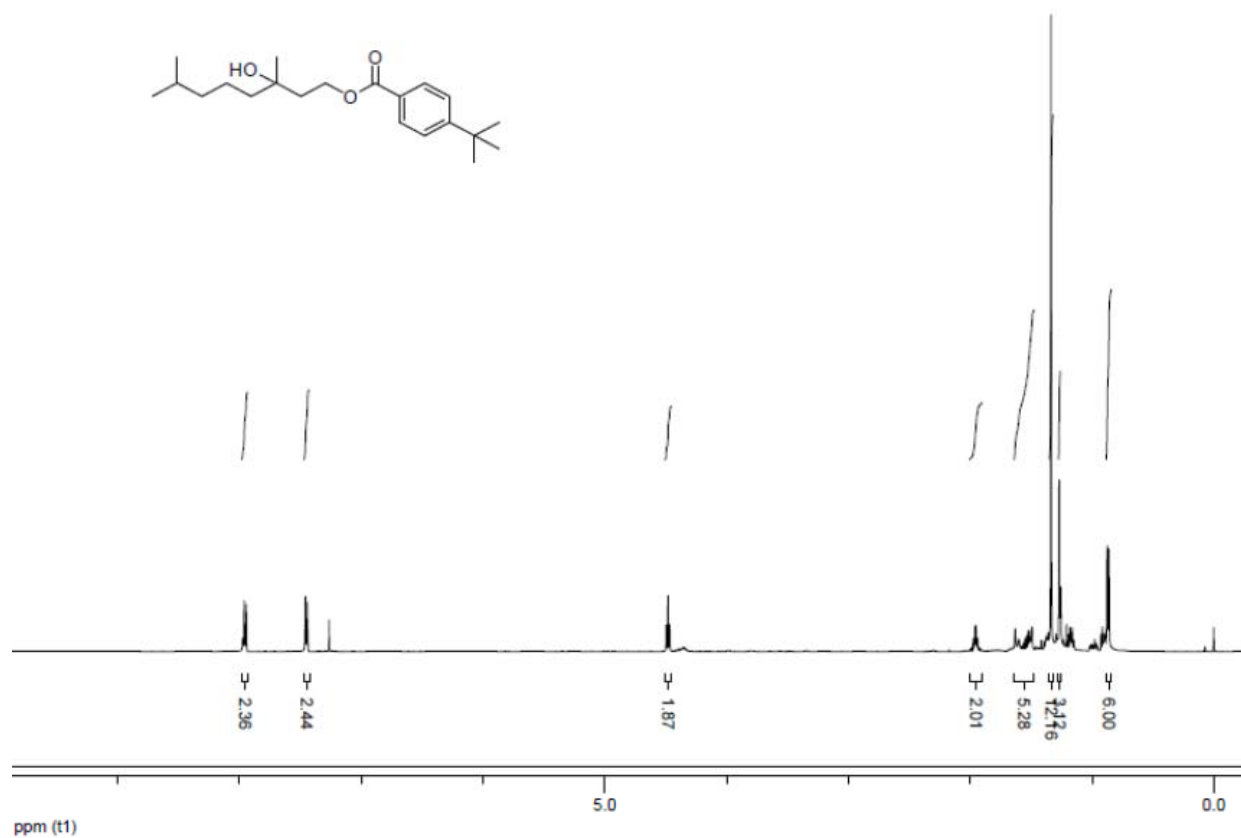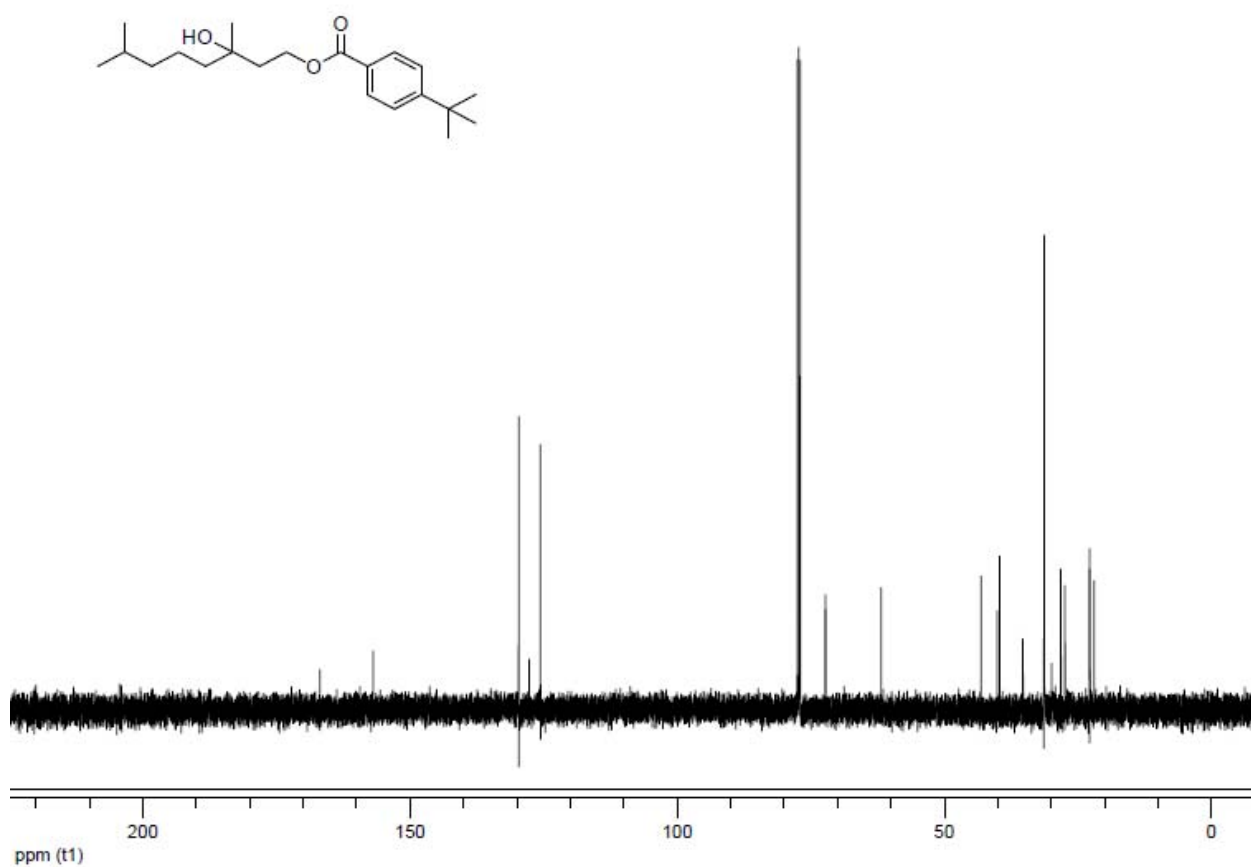



### 7-hydroxy-3,7-dimethyloctyl pivalate (4c)

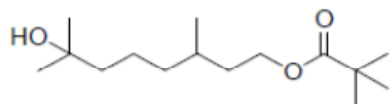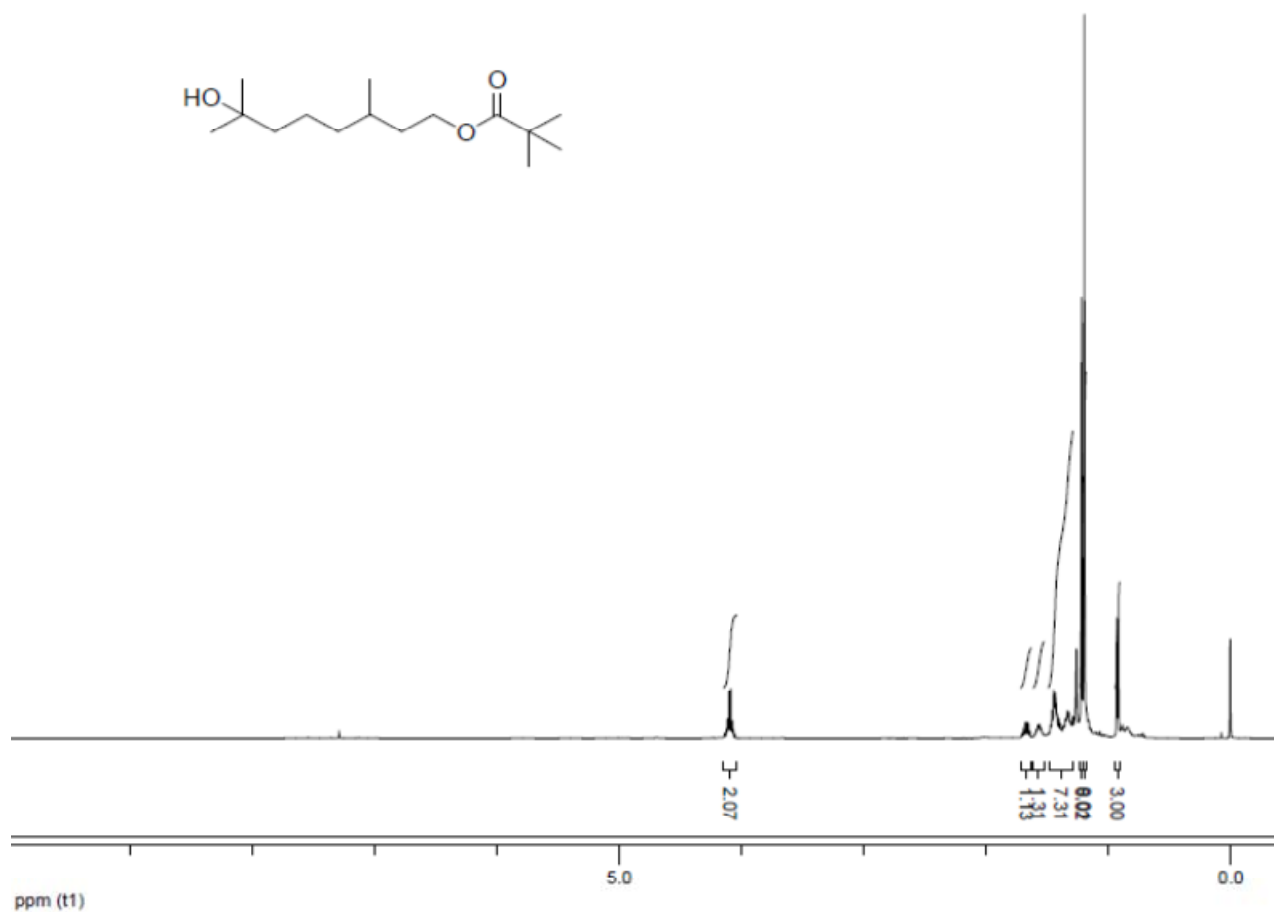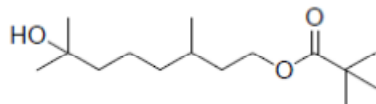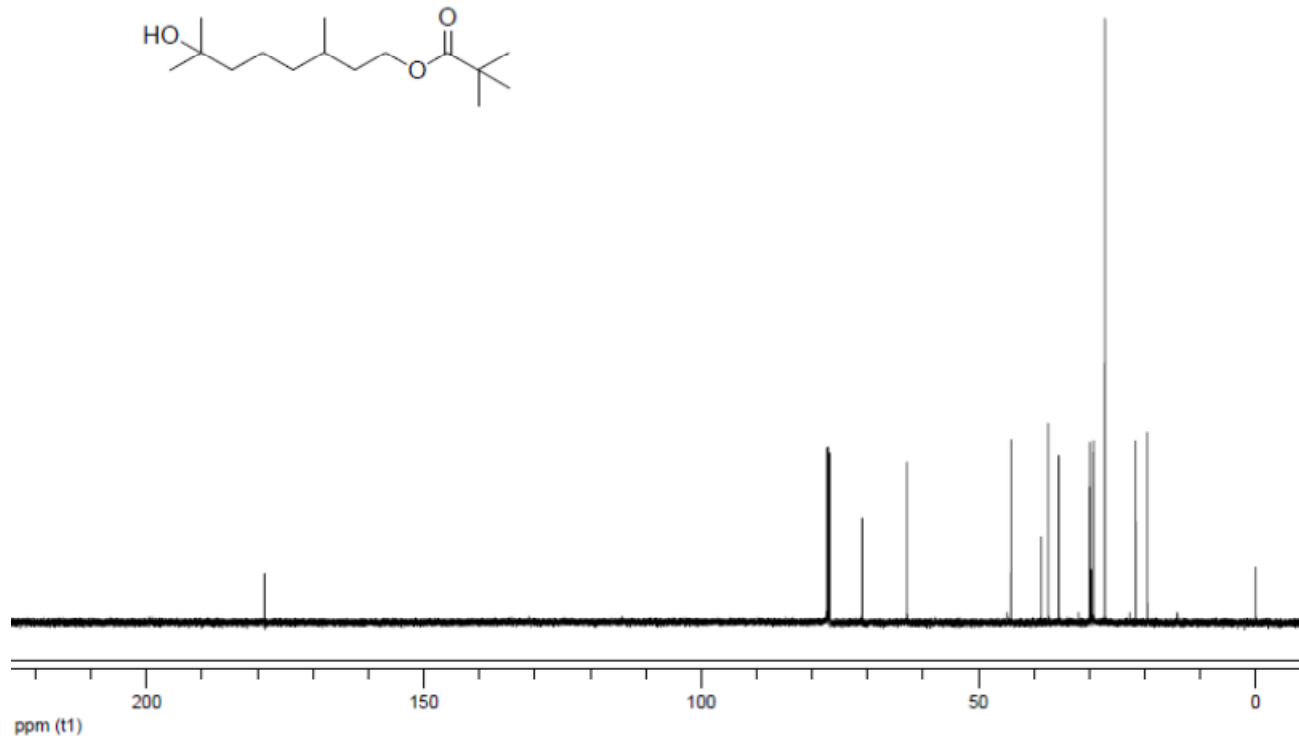

### 3-hydroxy-3,7-dimethyloctyl pivalate (4c')

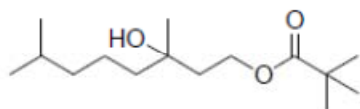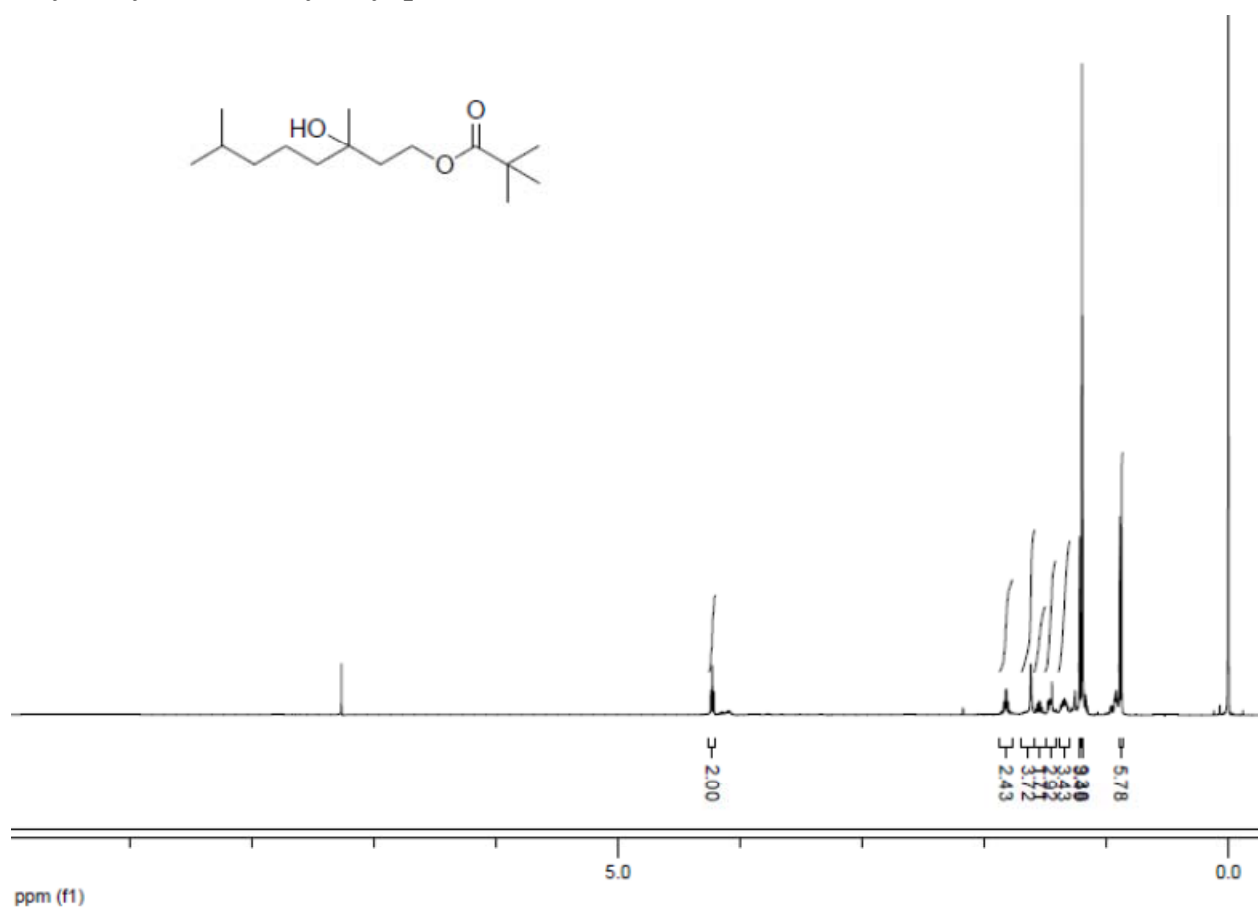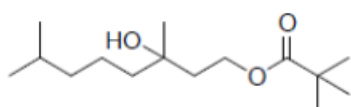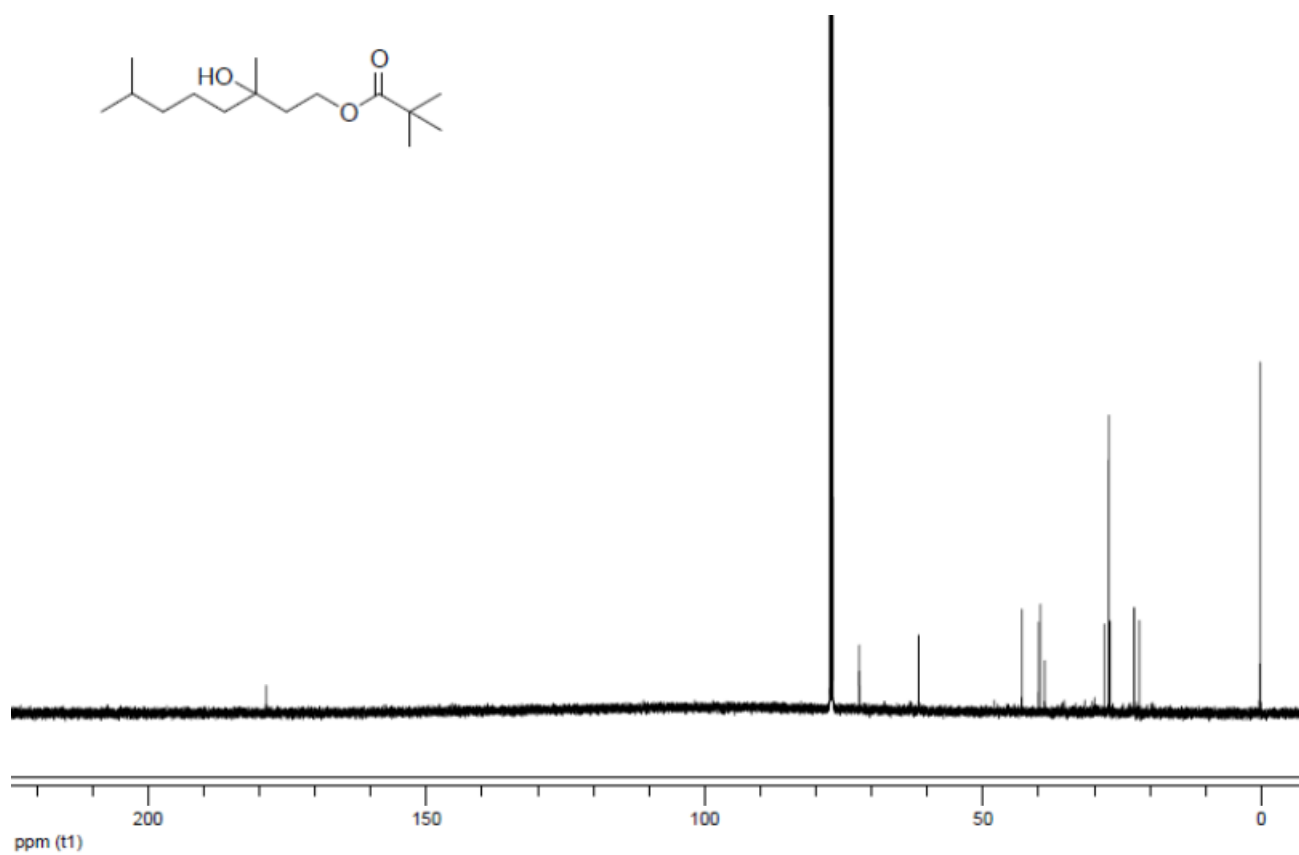

### 7-hydroxy-3,7-dimethyloctyl acetate (4d)

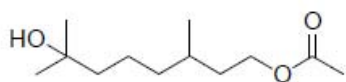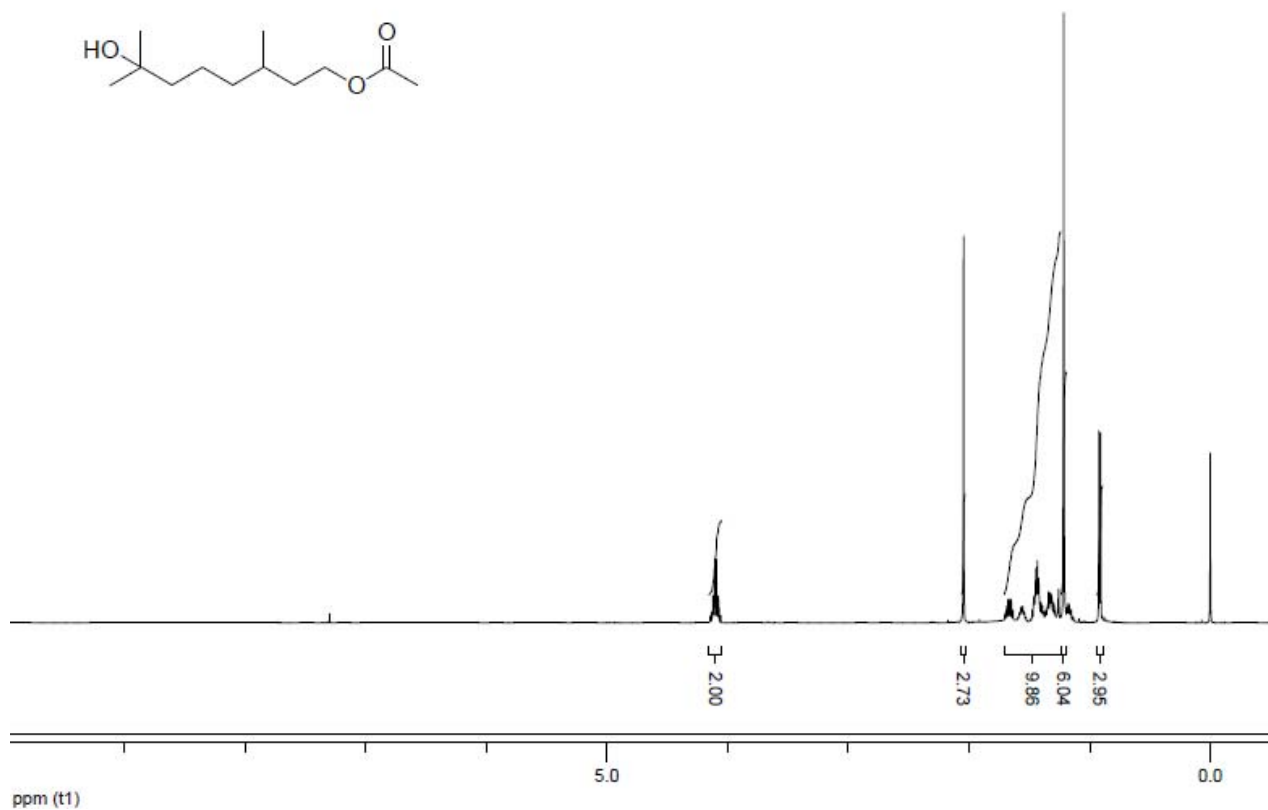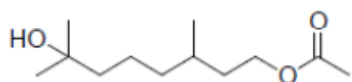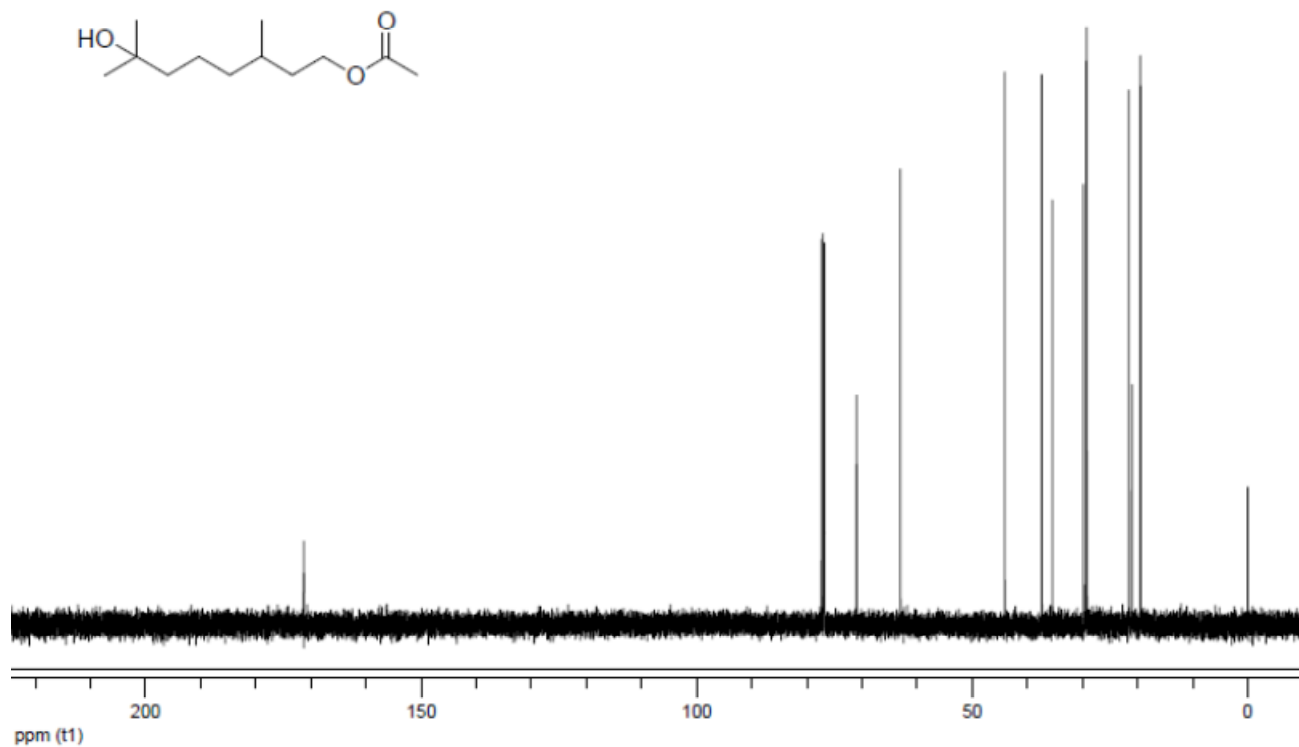

### 3-hydroxy-3,7-dimethyloctyl acetate (4d')

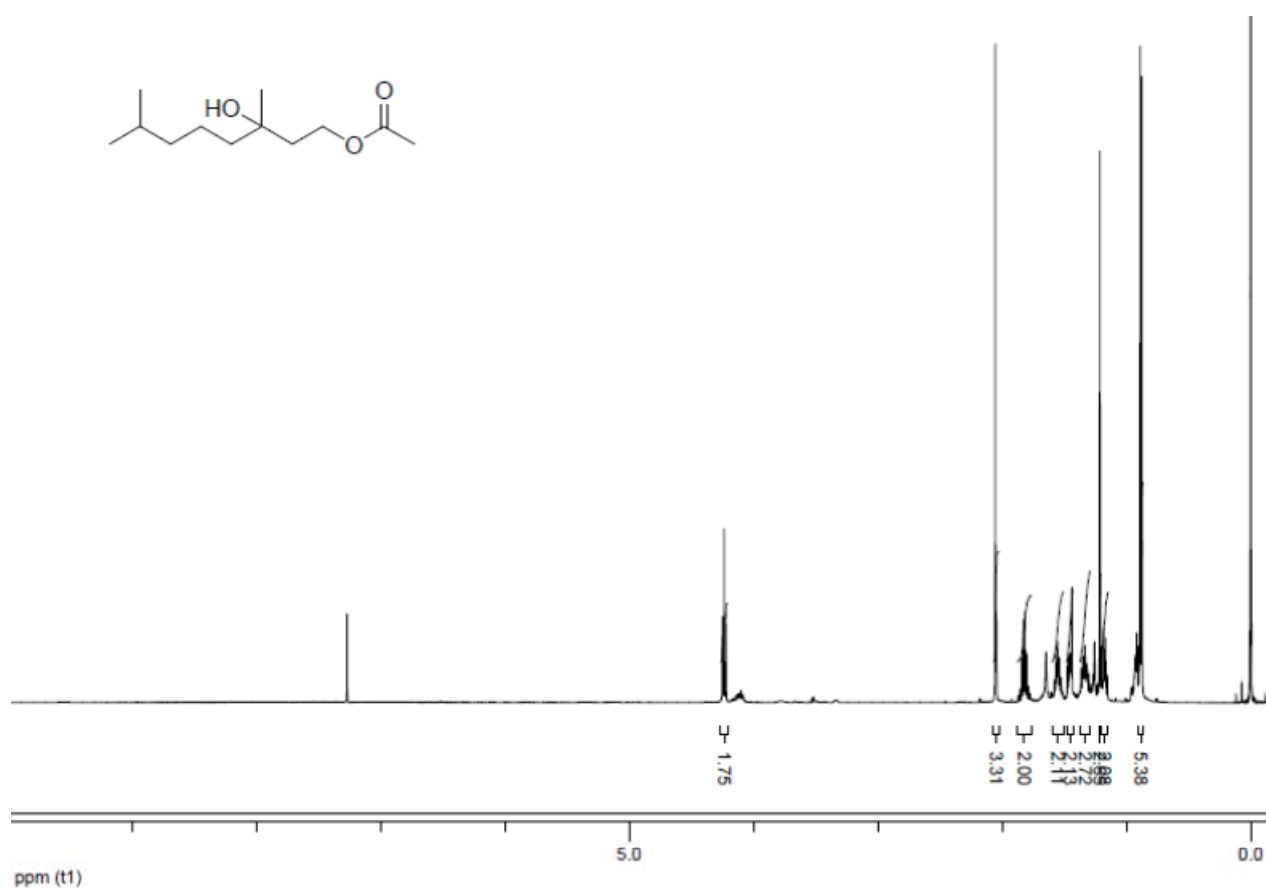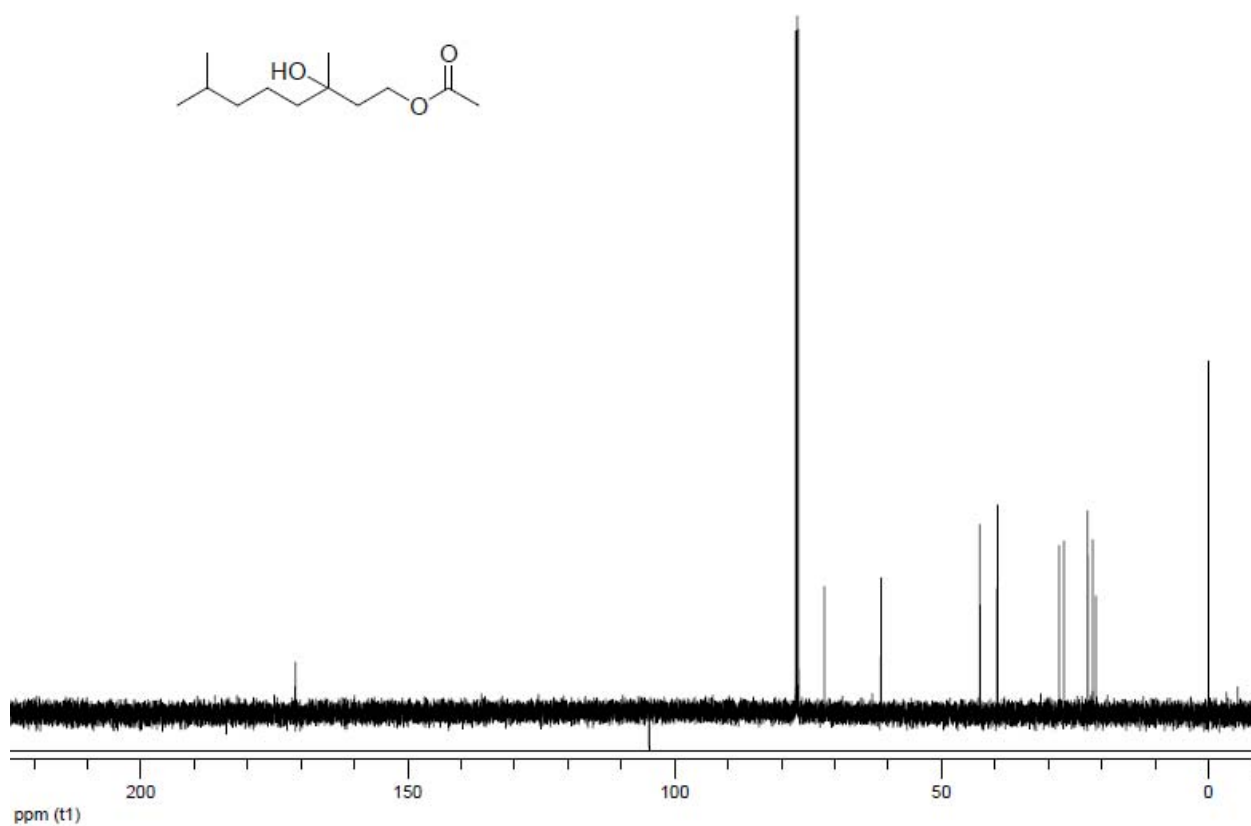

**Table 1, entry 1 (Table S3, entry 3; Table S4, entry 2)**

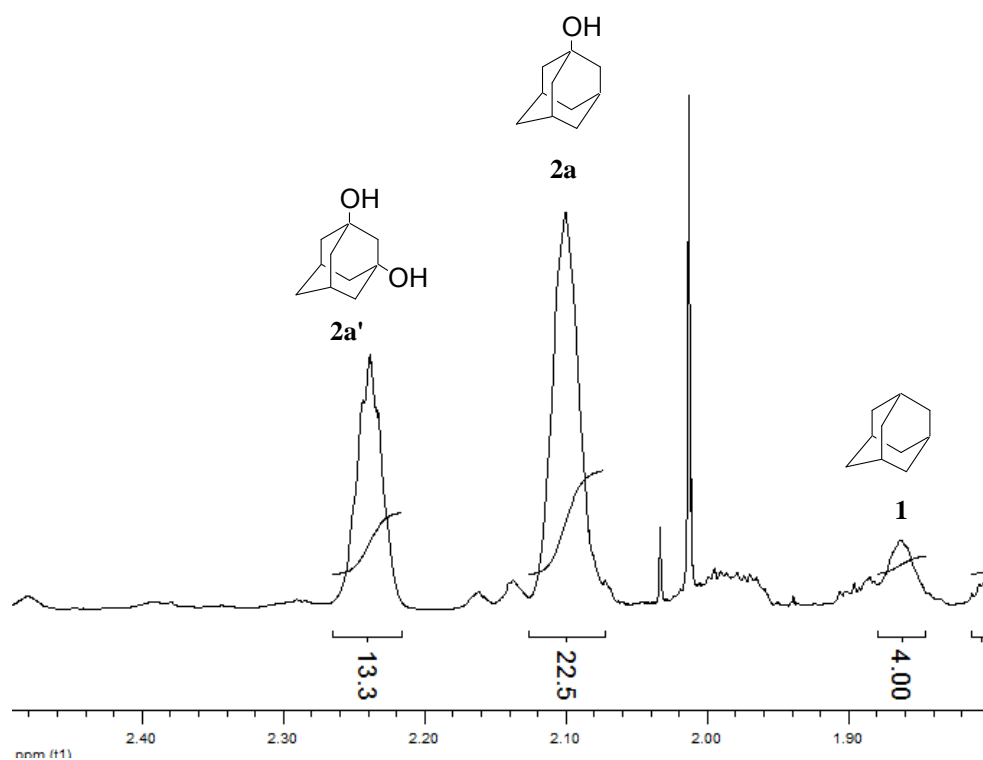

**Calculation of the ratio of adamantane (1) to products (Table 1, entry 1)**

**1 : 2a : 2a'**

$$= [4/4 \div (4/4 + 22.5/3 + 13.3/2) \times 100] : [22.5/3 \div (4/4 + 22.5/3 + 13.3/2) \times 100] : [13.3/2 \div (4/4 + 22.5/3 + 13.3/2) \times 100]$$

$$= 7 : 50 : 43$$

**Table 1, entry 2**

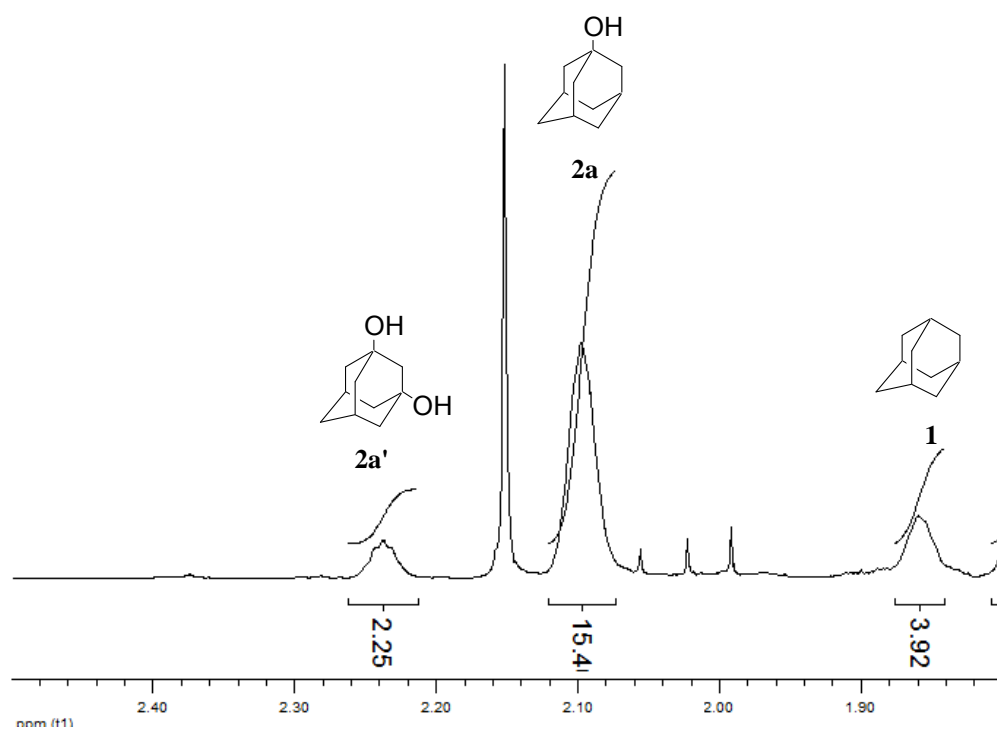

**Table 1, entry 3**

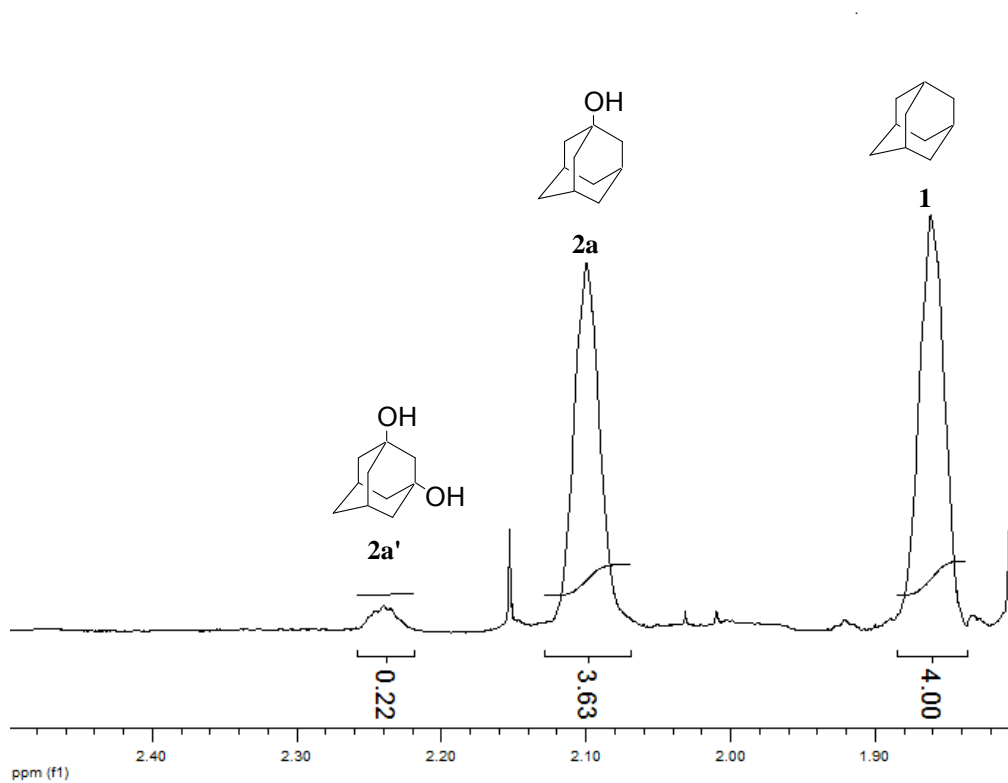

**Table 1, entry 4**

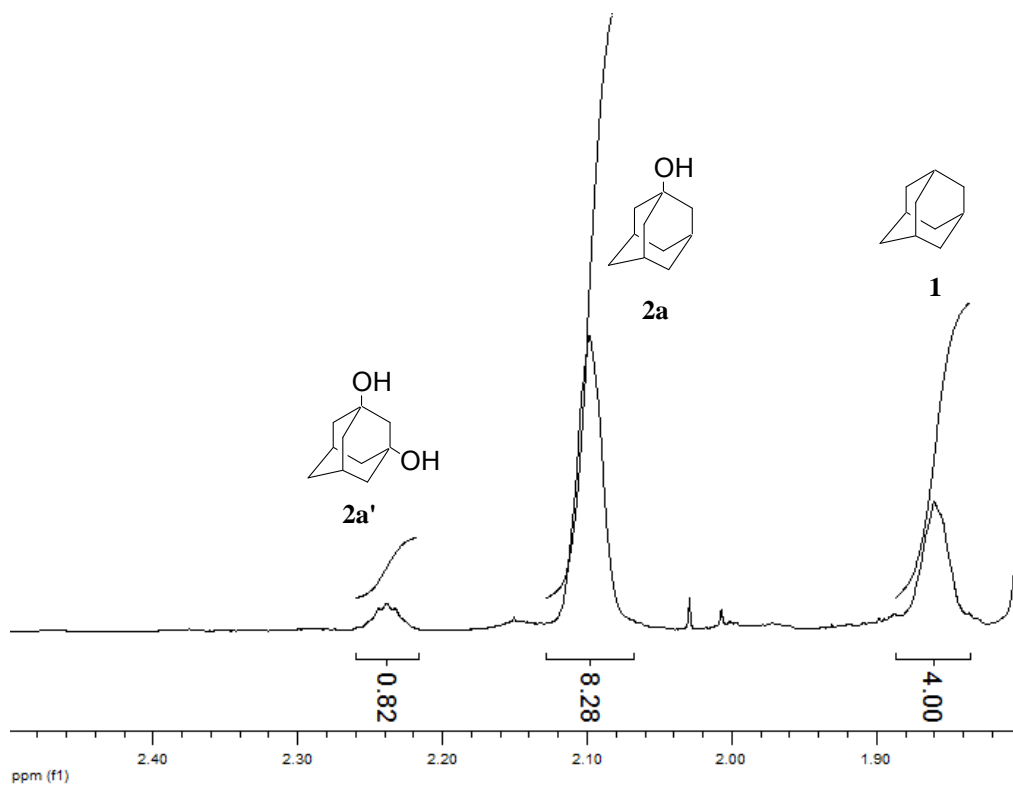

**Table 1, entry 5**

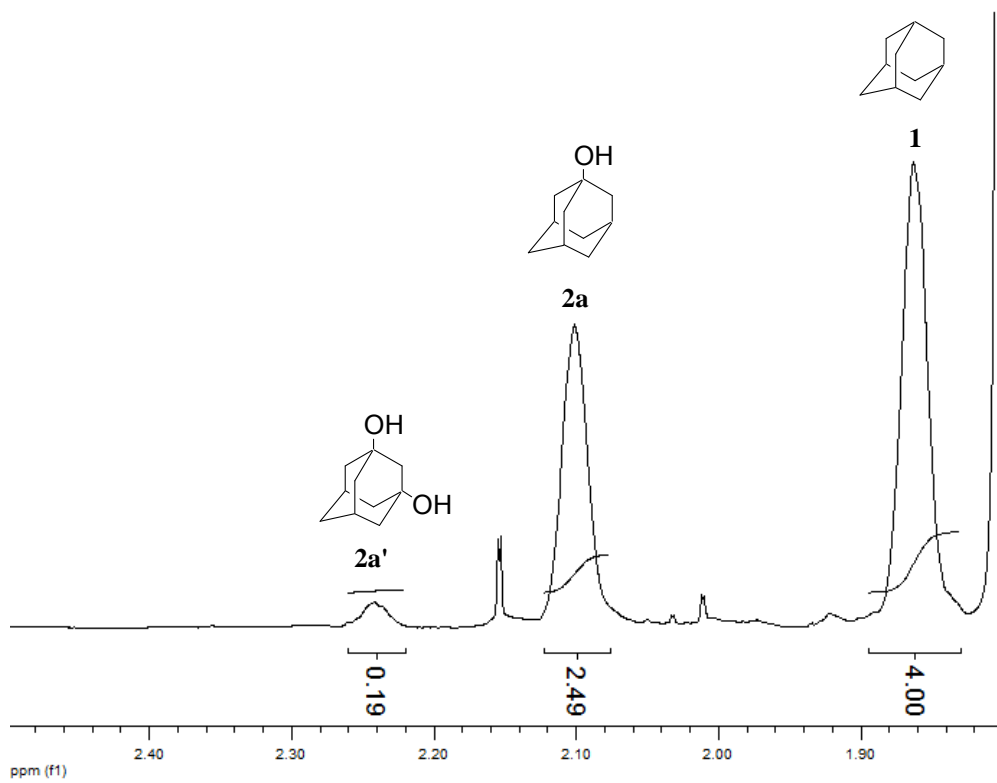

**Table 1, entry 6**

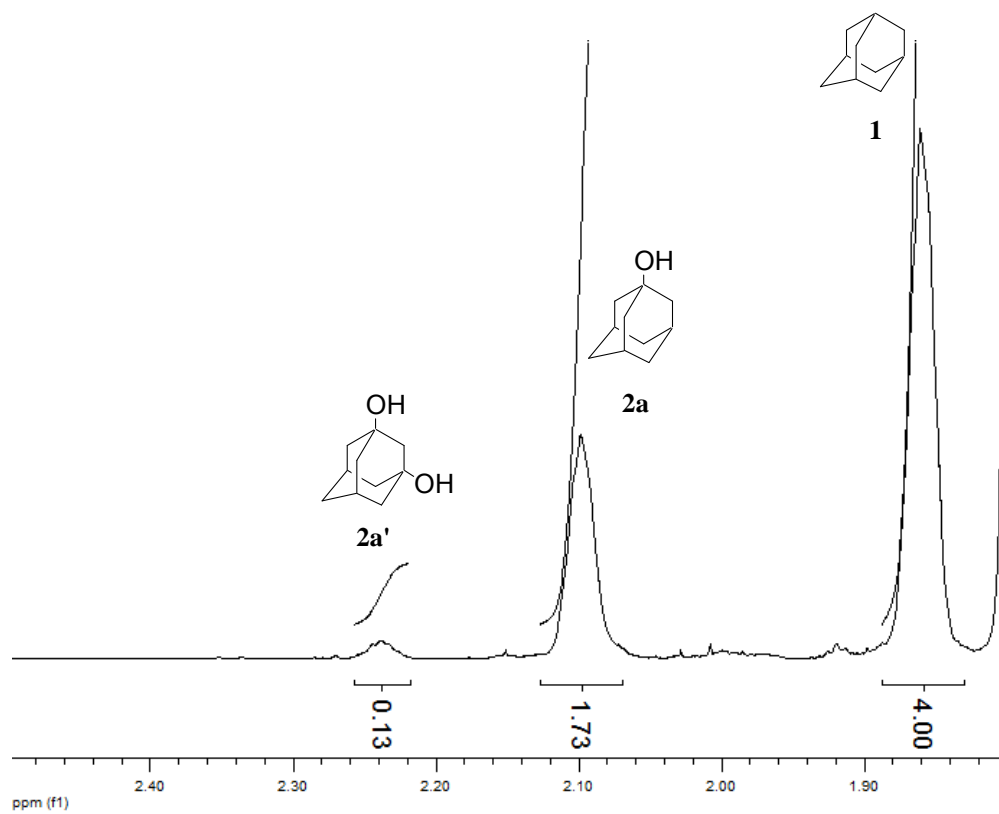

**Table 1, entry 7**

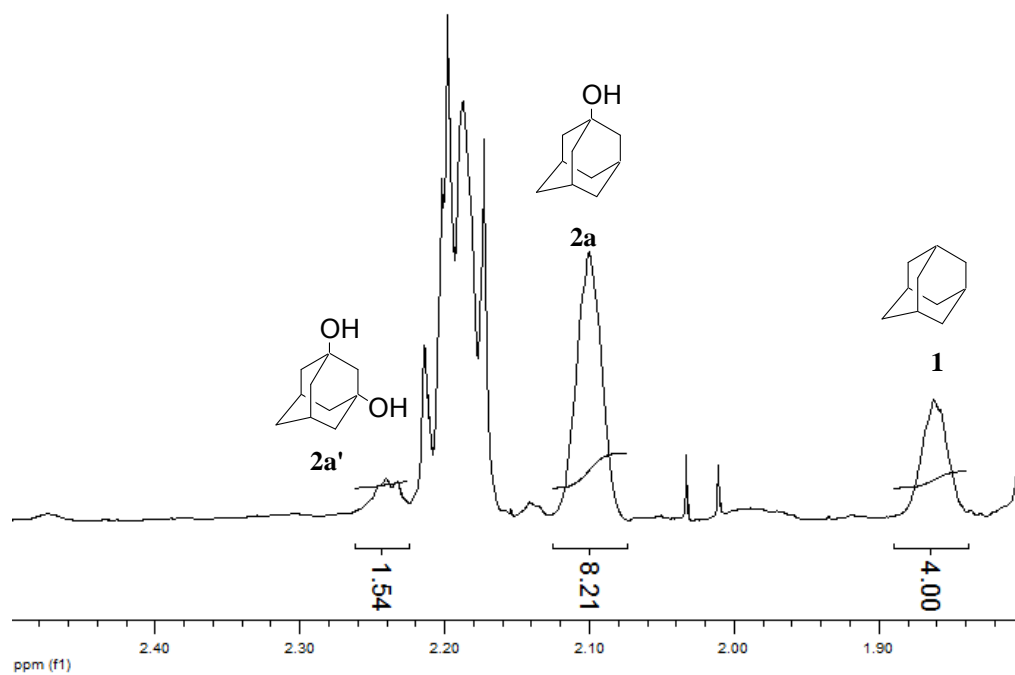



**Table 1, entry 8**

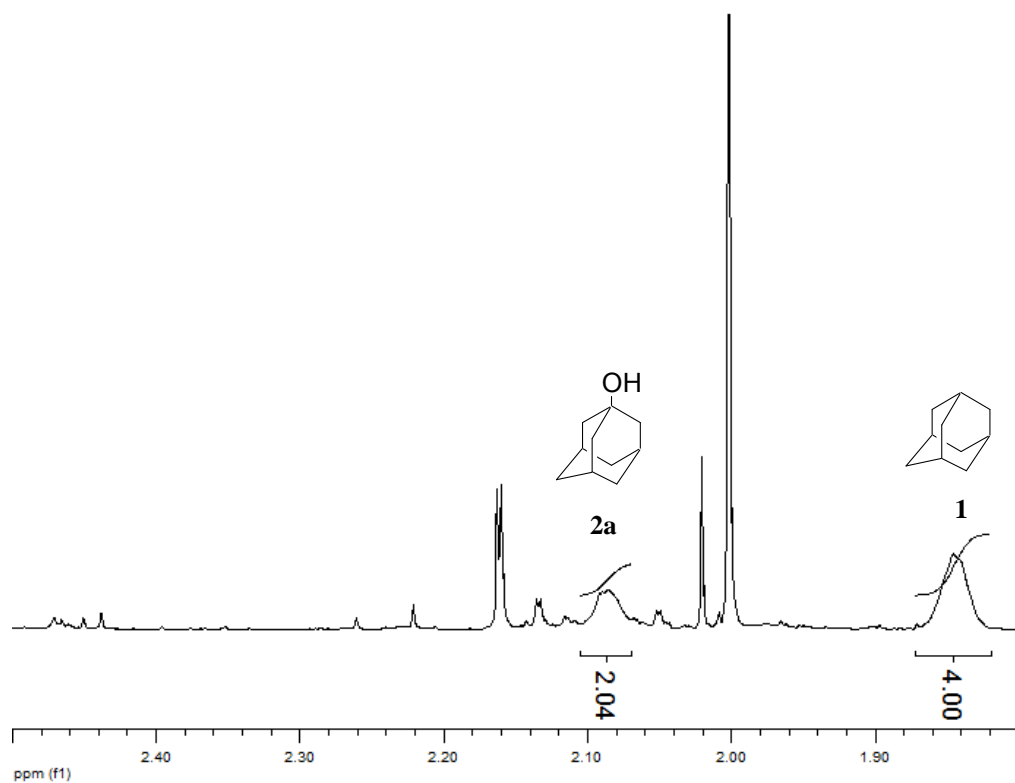

**Table 2, entry 1 (Table 3, entry 2; Table S6, entry 3)**

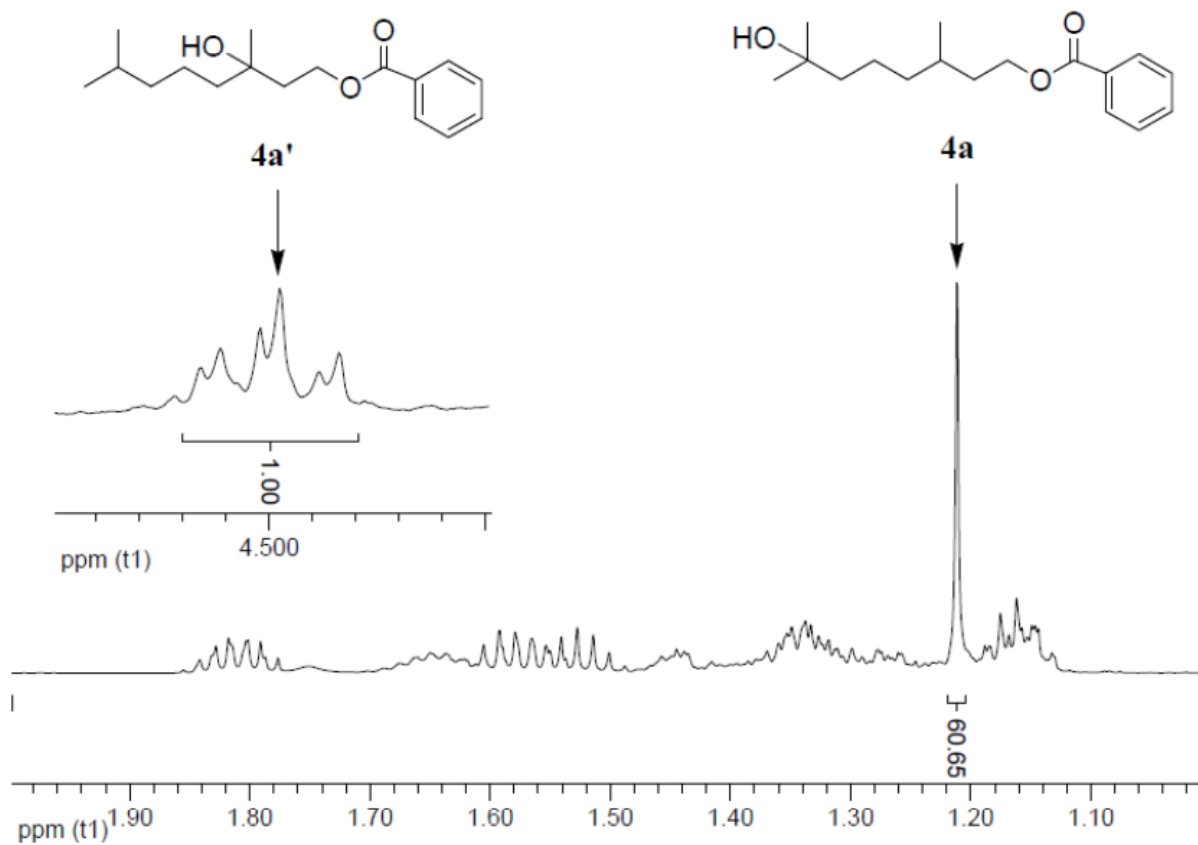

**Table 2, entry 2 (Table 3, entry 4)**

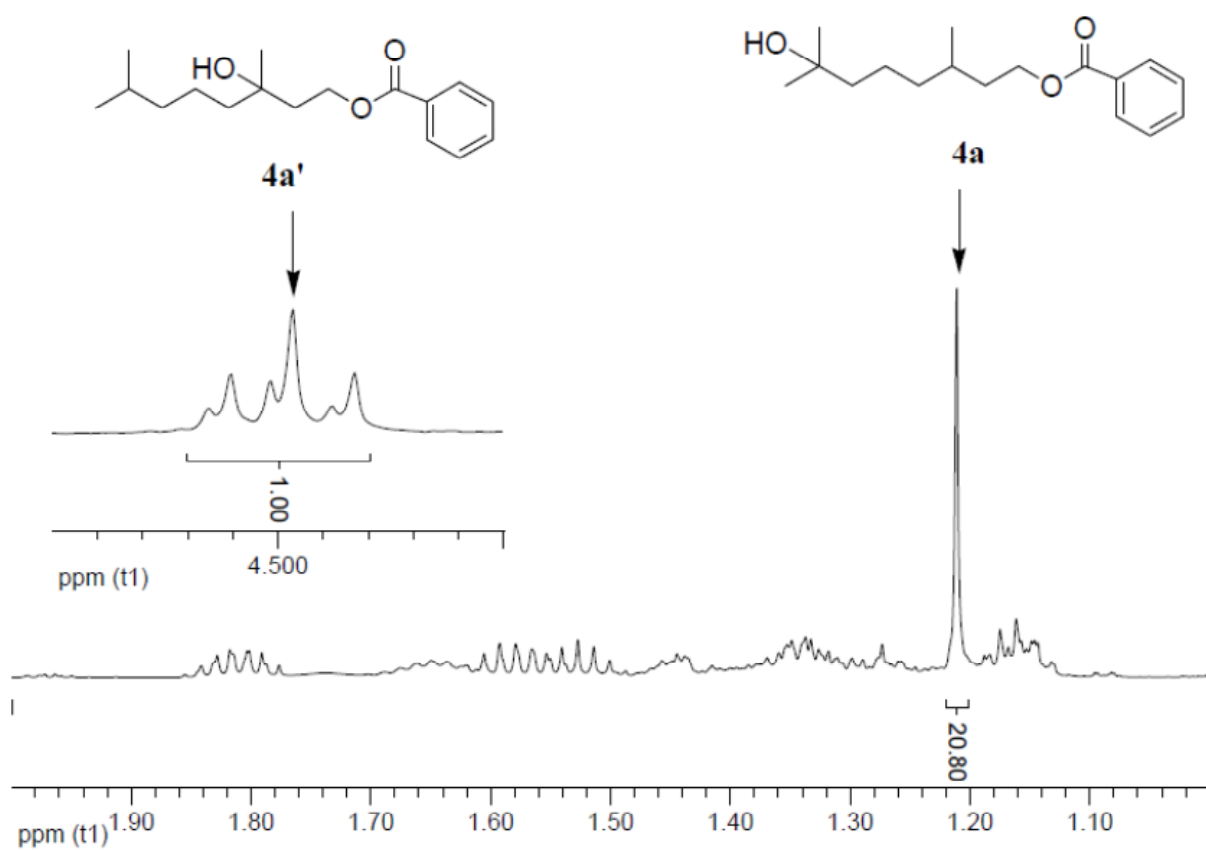

**Table 2, entry 3**

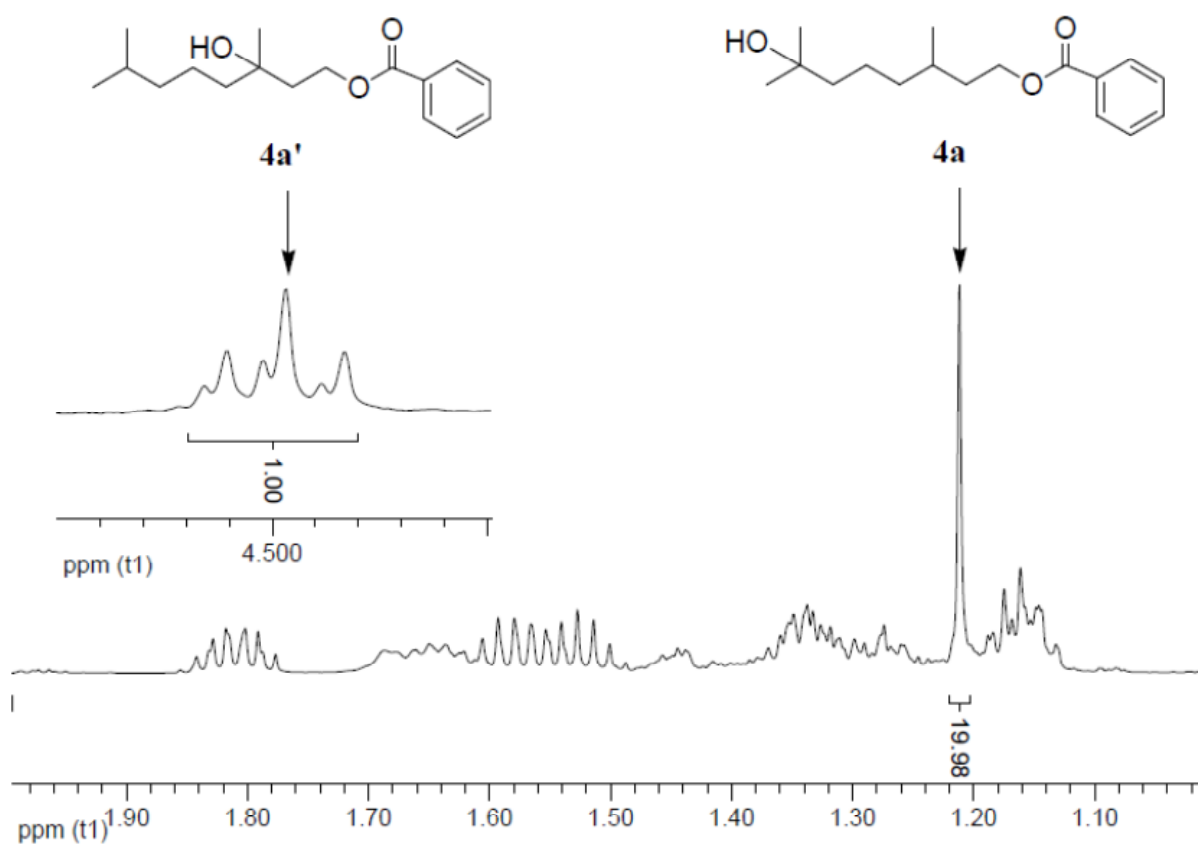

**Table 2, entry 4**

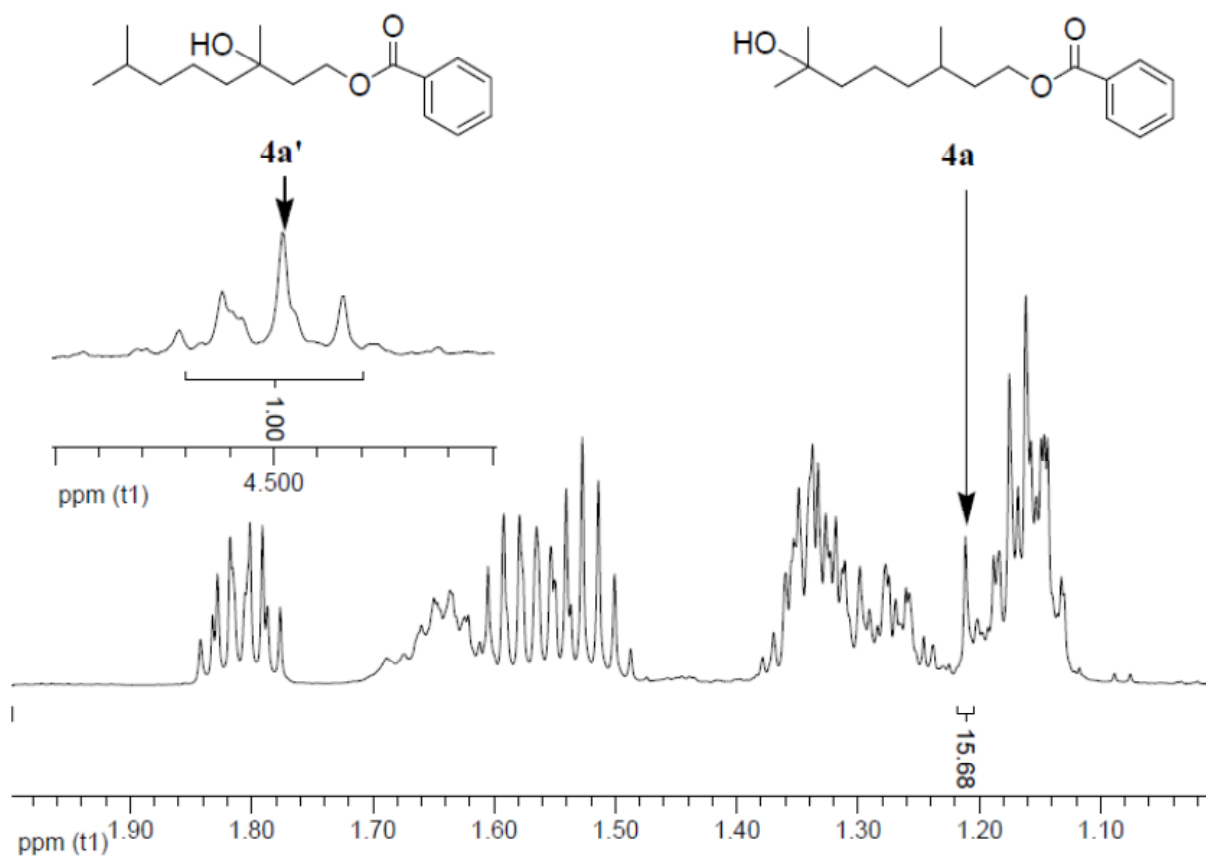

**Table 3, entry 1**

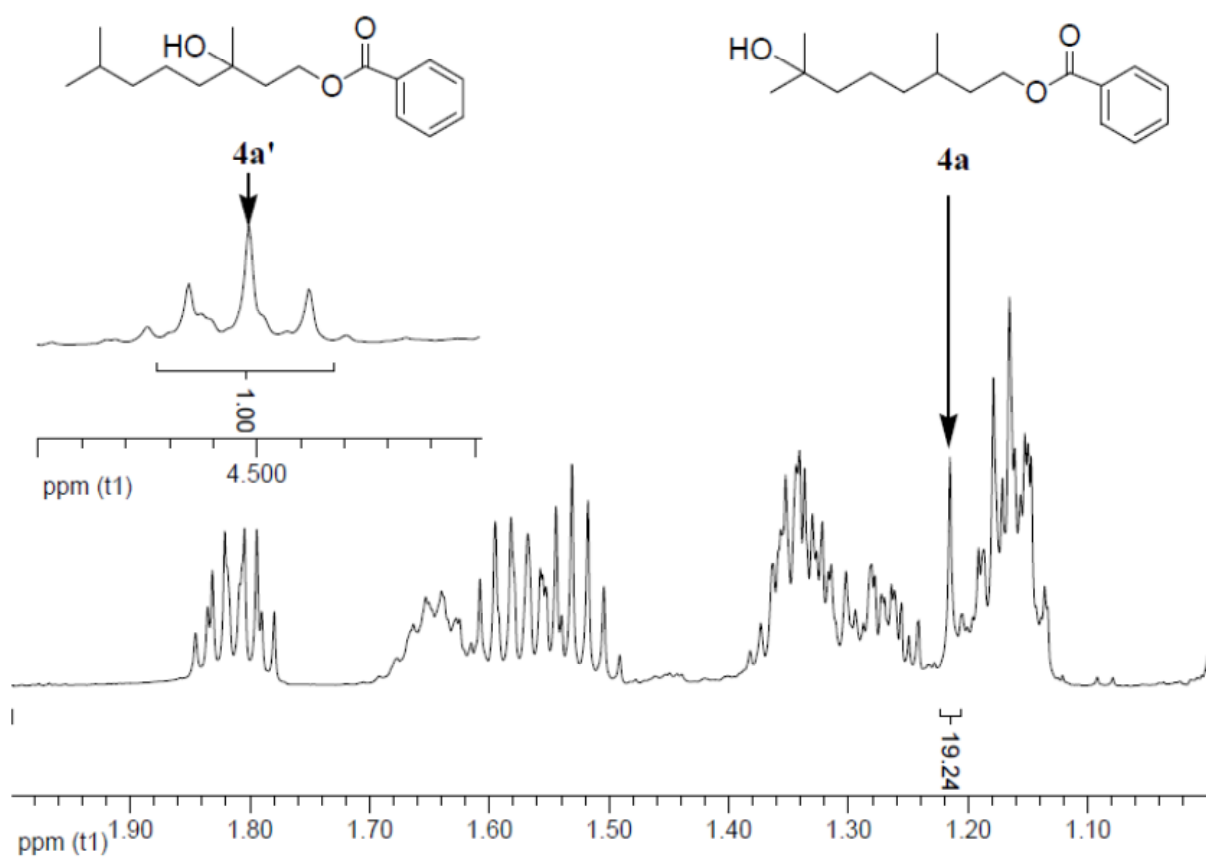

**Table 3, entry 3**

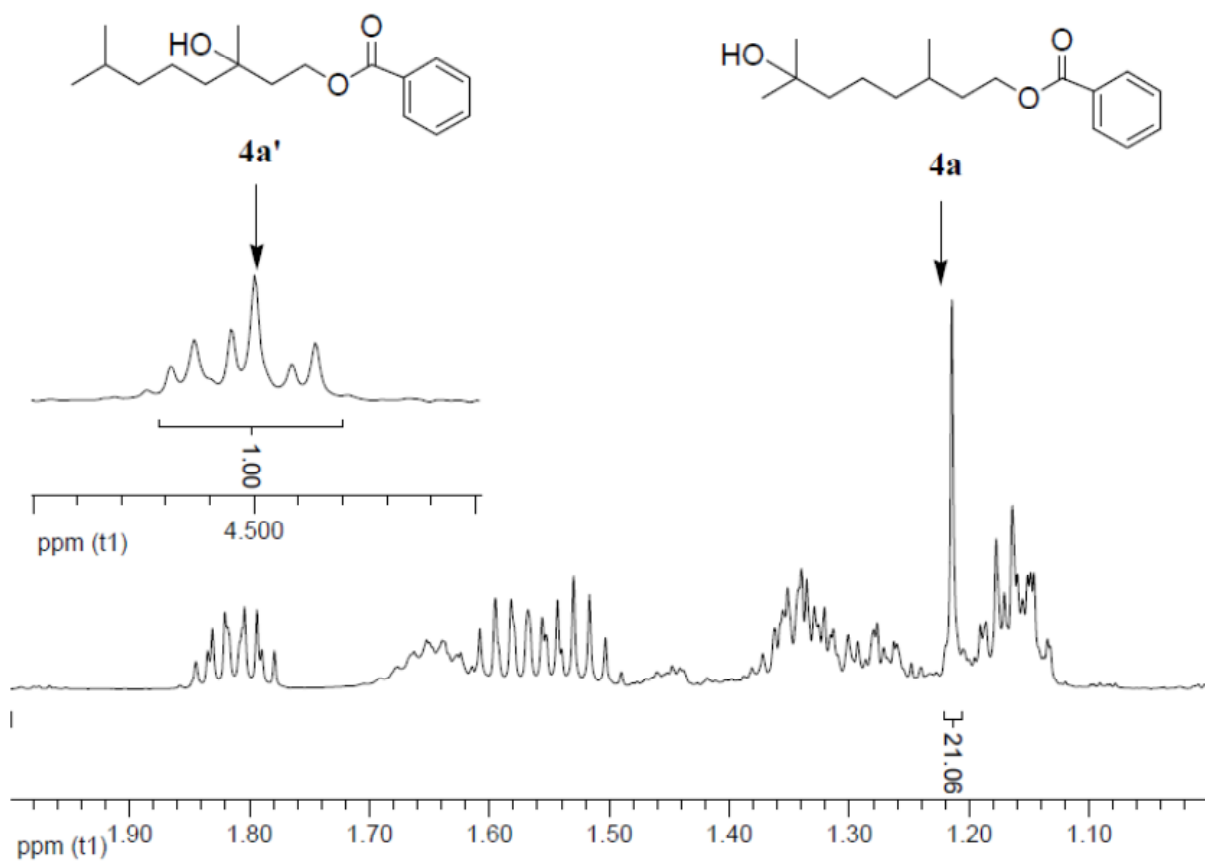

**Table 3, entry 5**

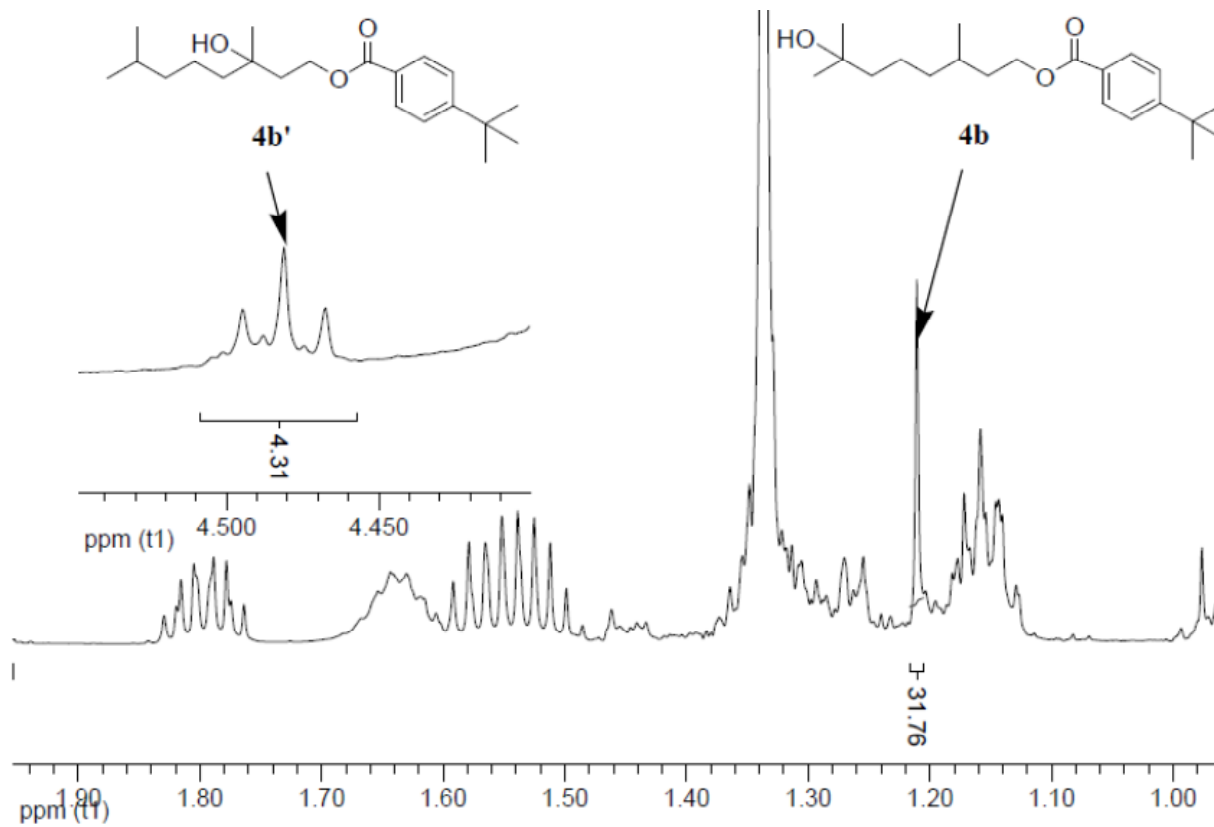

**Table 3, entry 6**

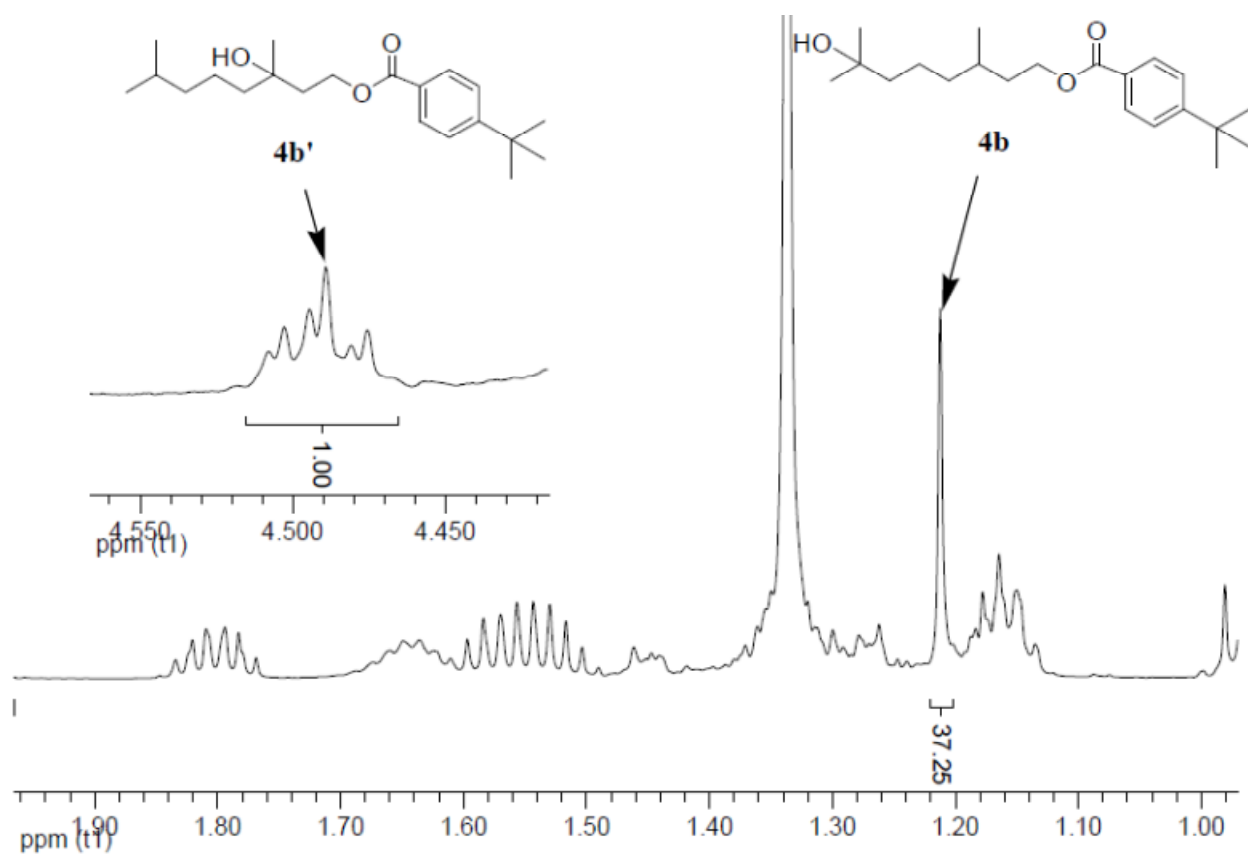

**Table 3, entry 7**

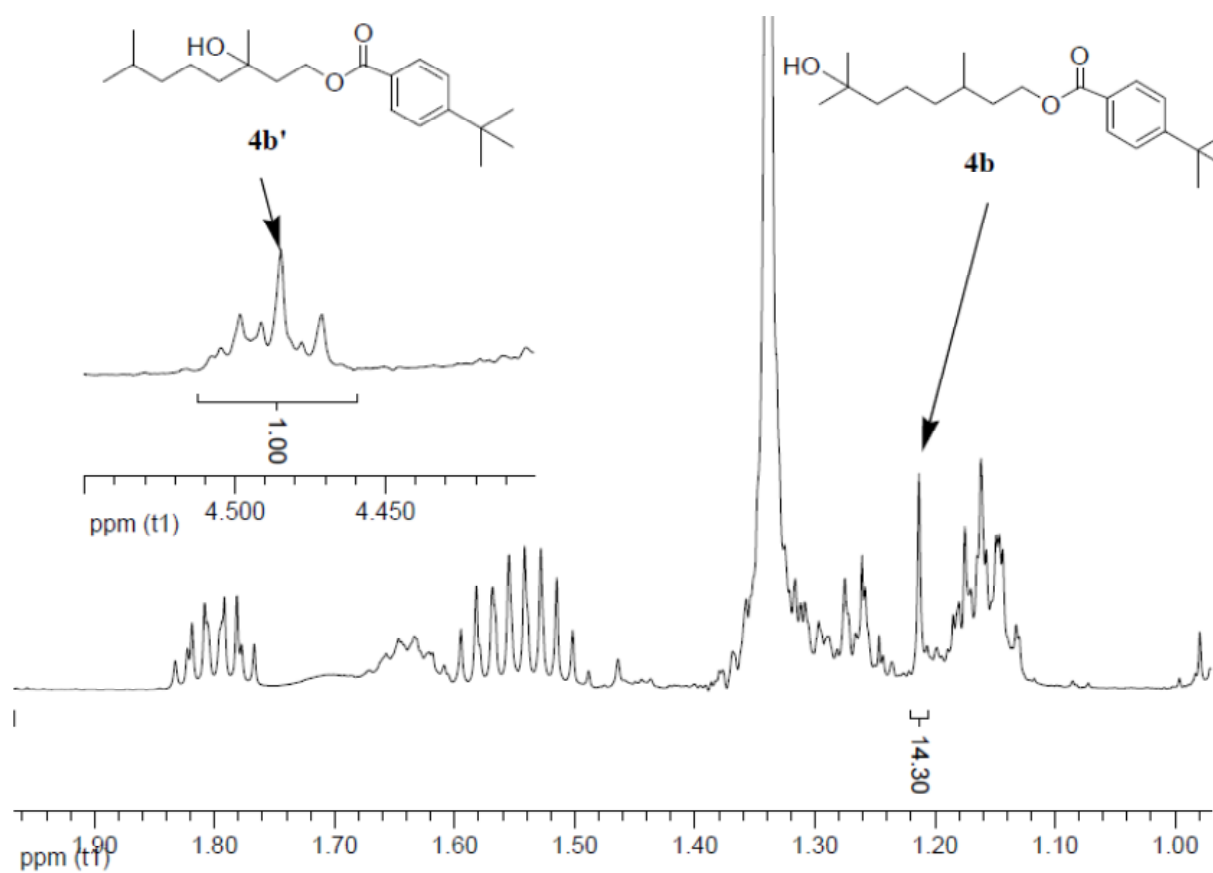

**Table 3, entry 8**

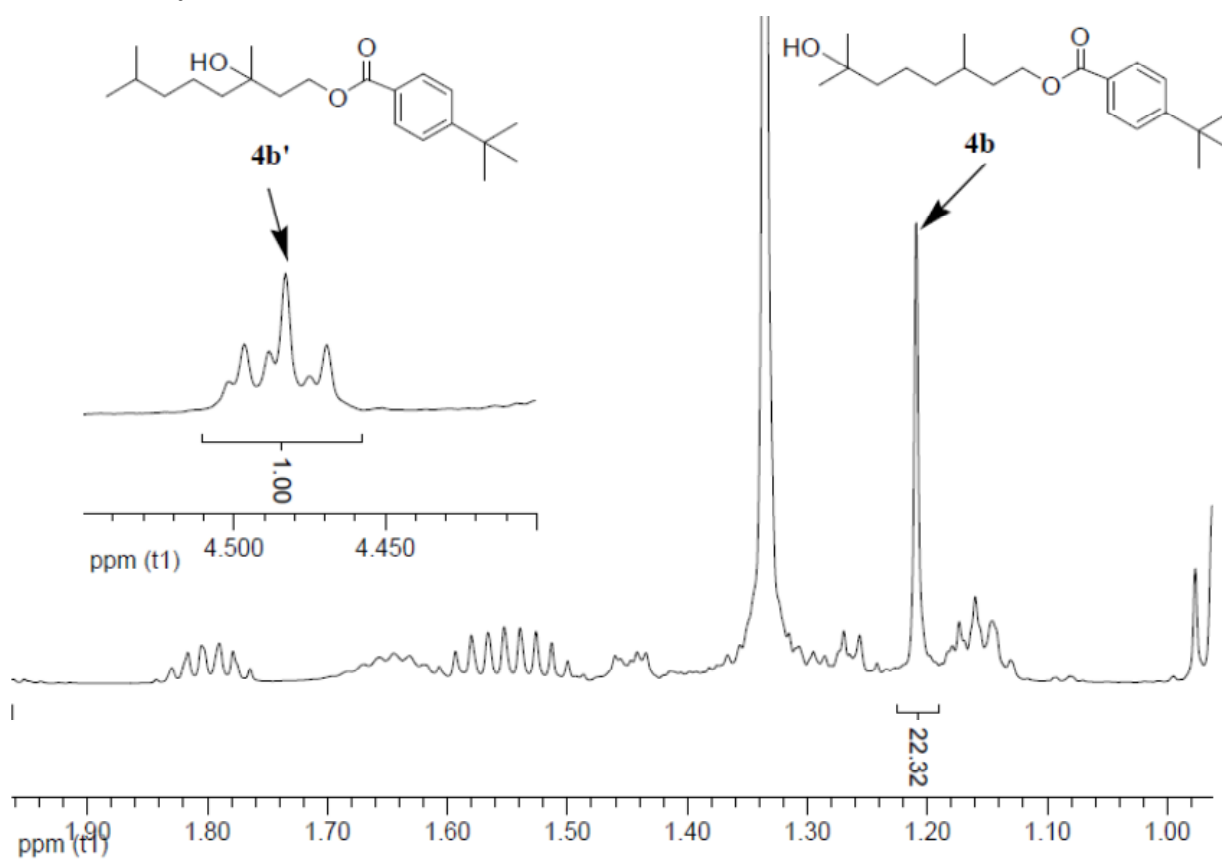

**Table 3, entry 9**

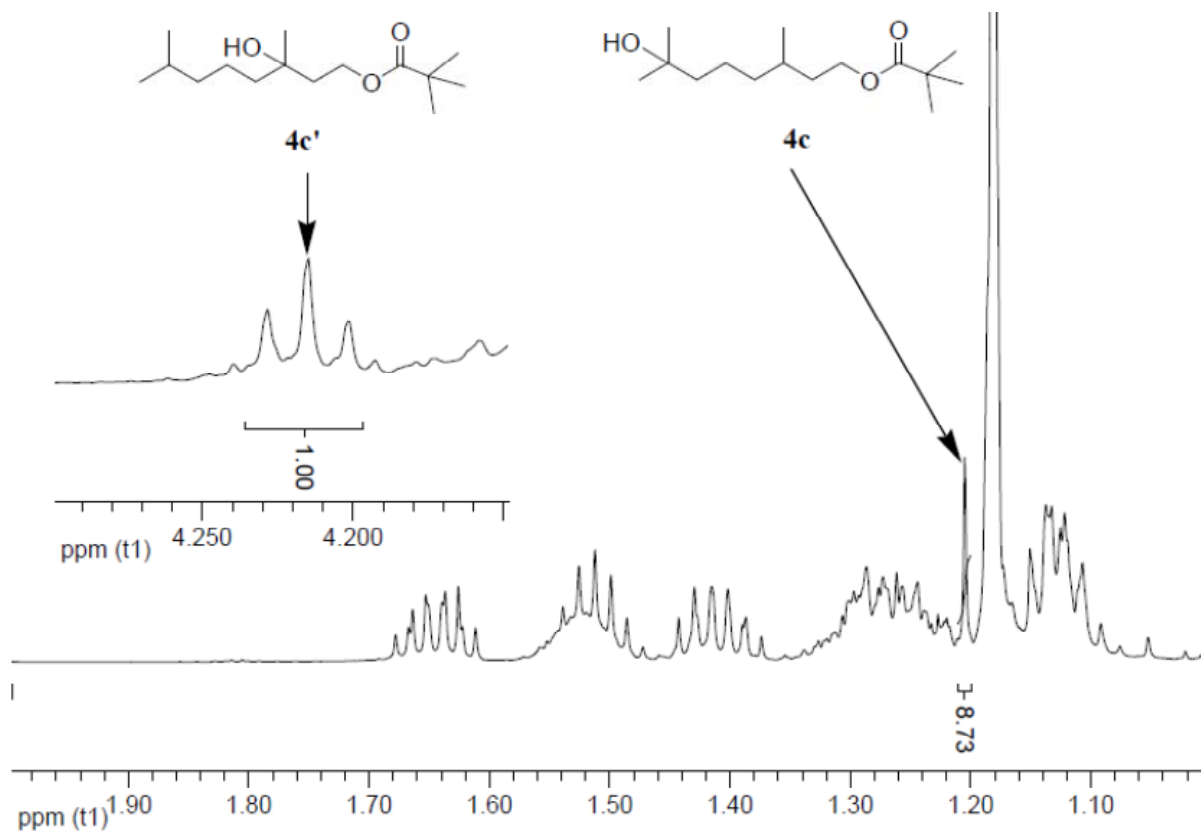

**Table 3, entry 10**

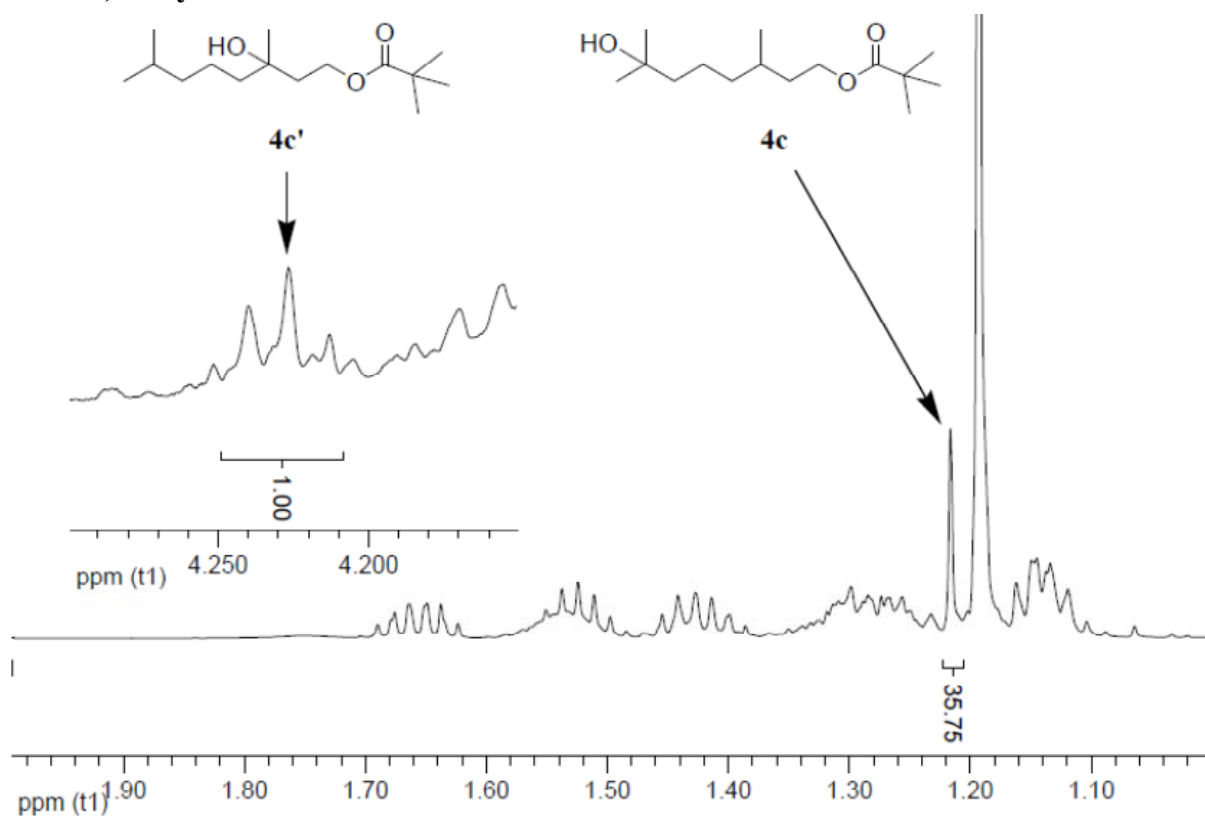

**Table 3, entry 11**

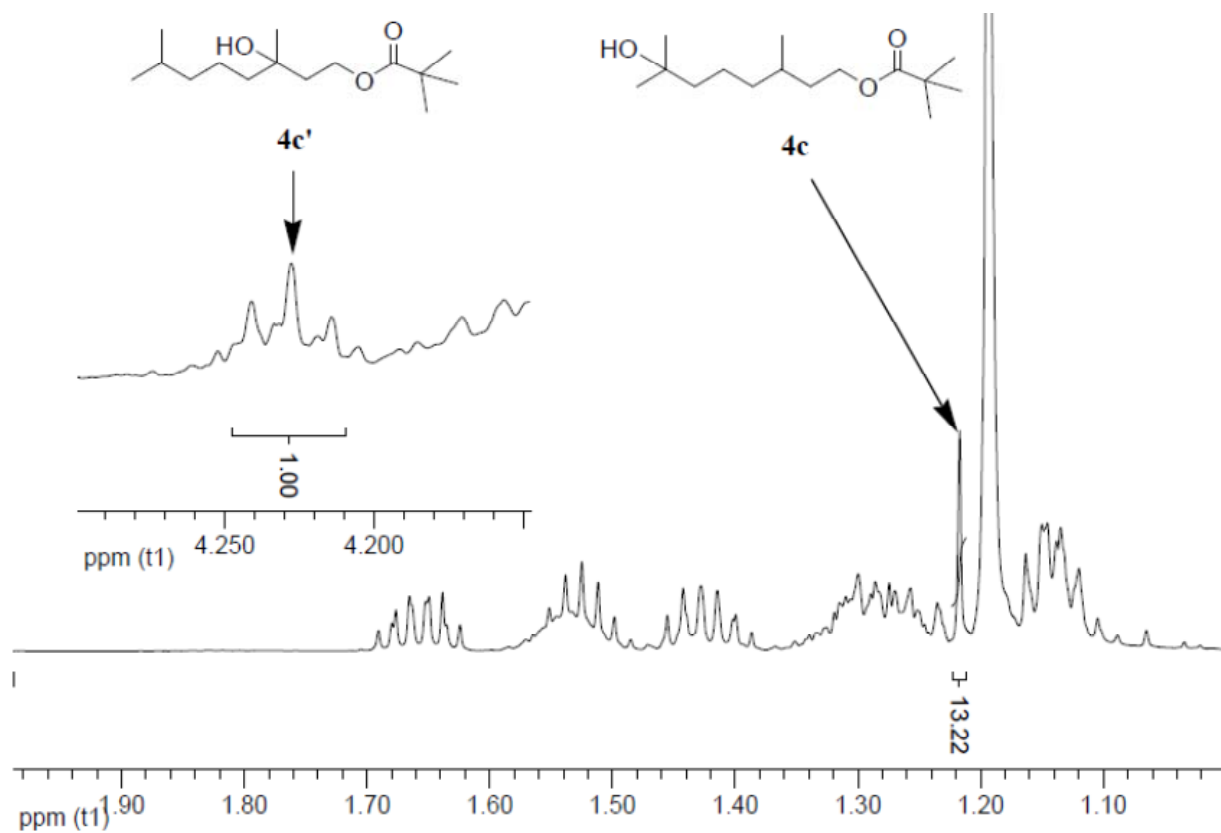

**Table 3, entry 12**

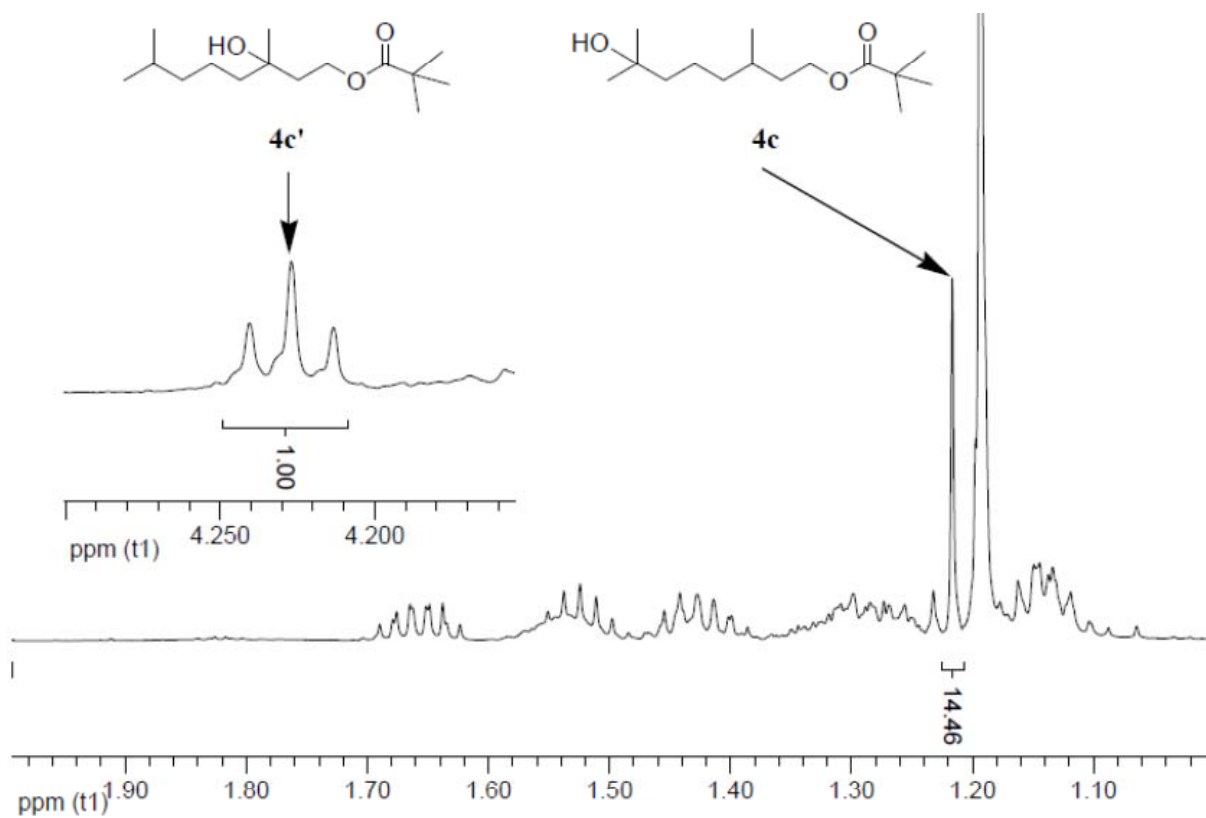

**Table 3, entry 14**

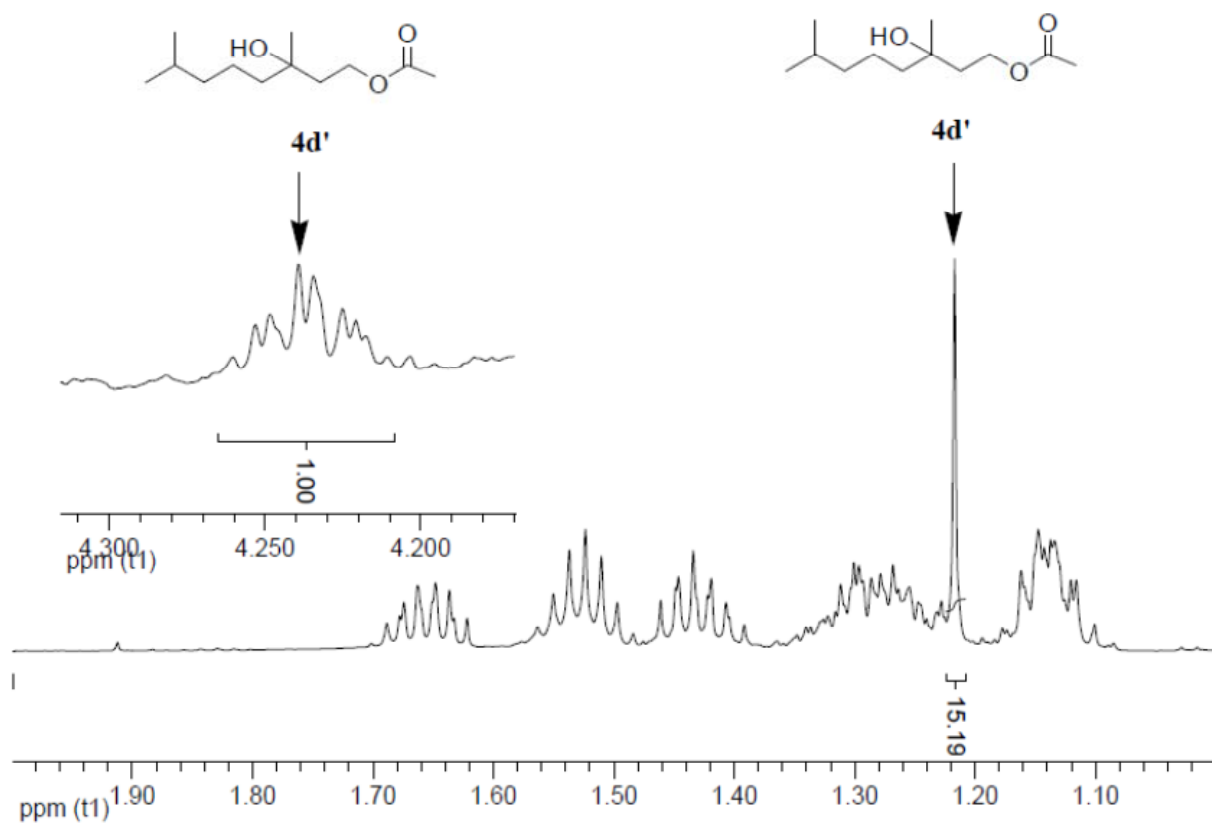



**Table 3, entry 15**

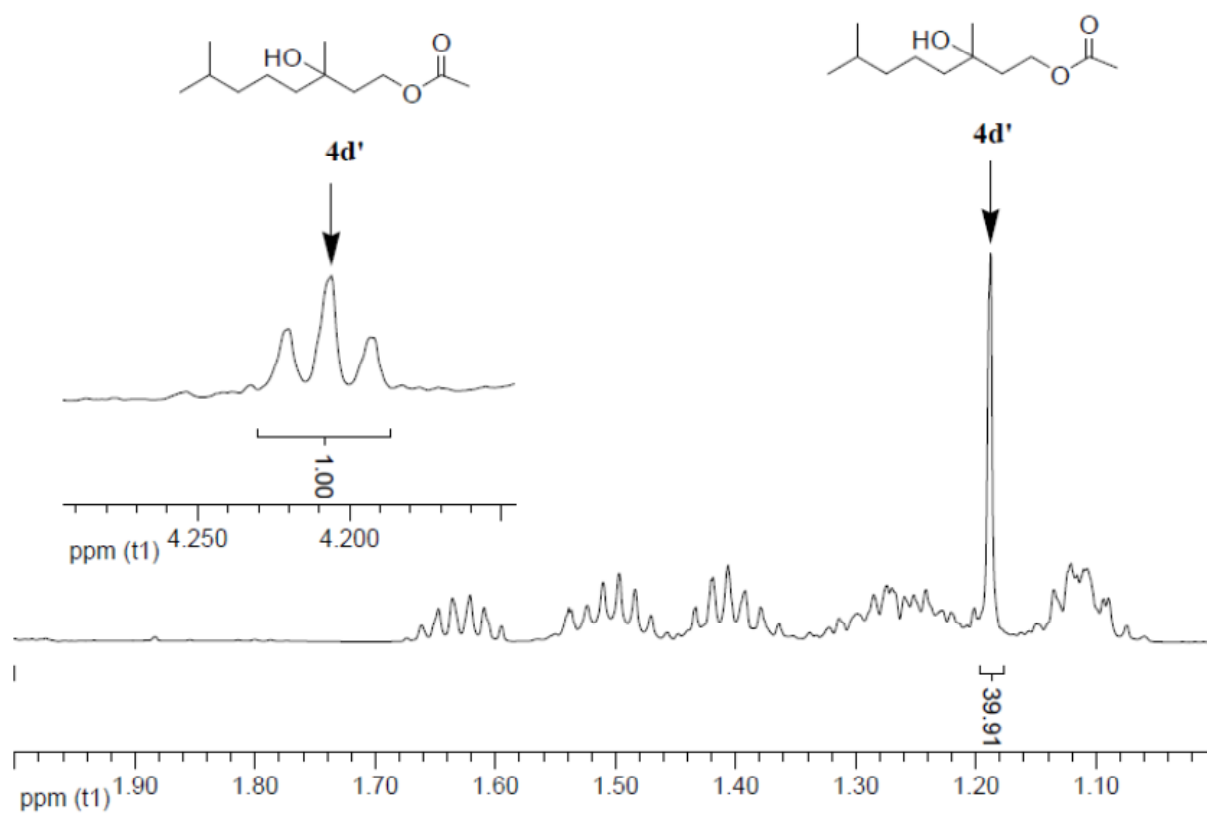

**Table 3, entry 16**

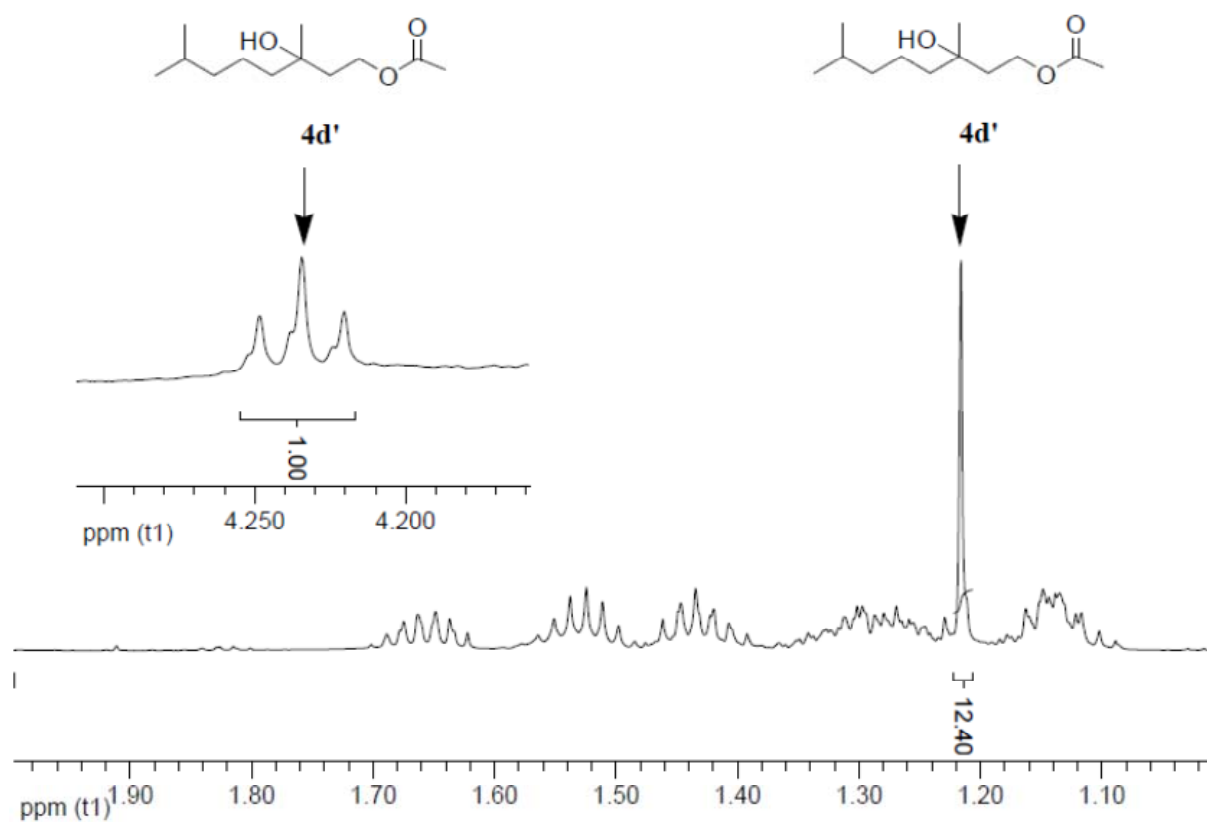

**Table S1, entry 1 (Table S2, entry 1; Table S3, entry 1)**

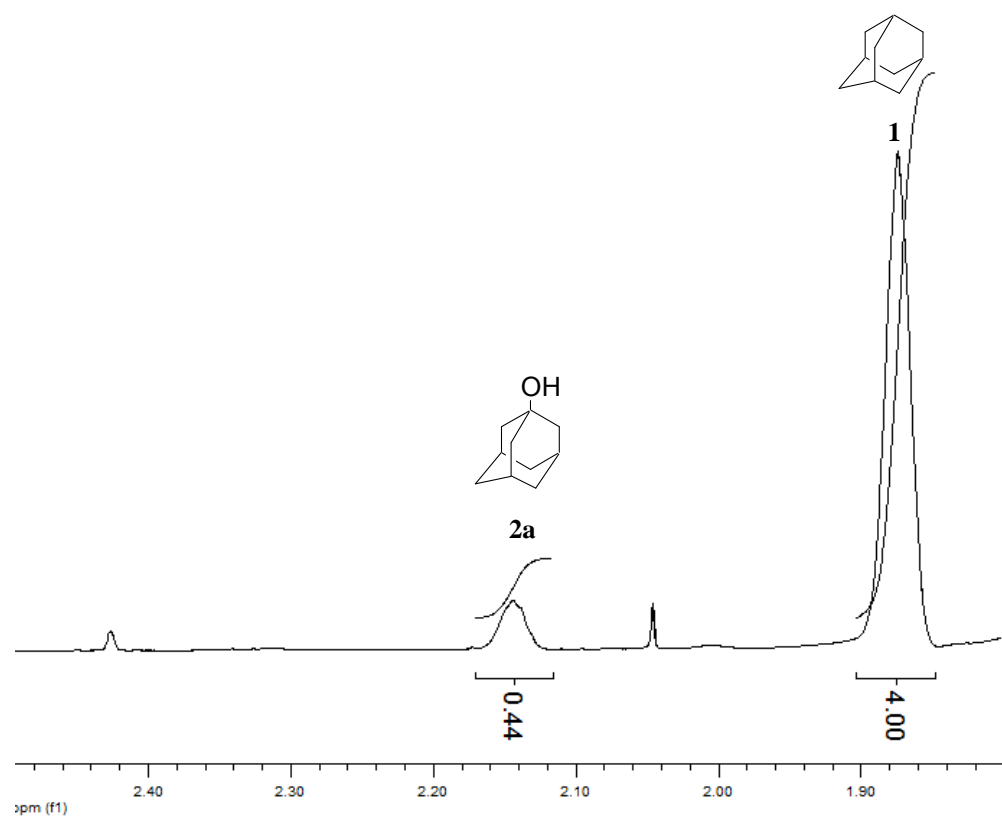

**Table S1, entry 2**

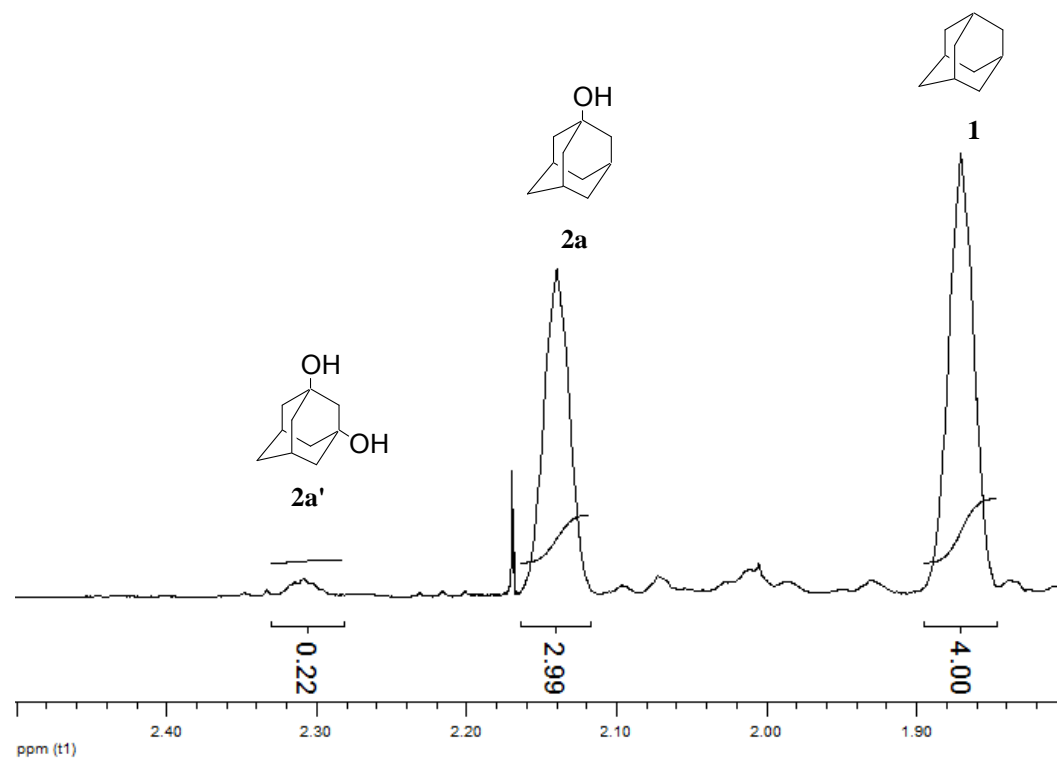

**Table S1, entry 3**

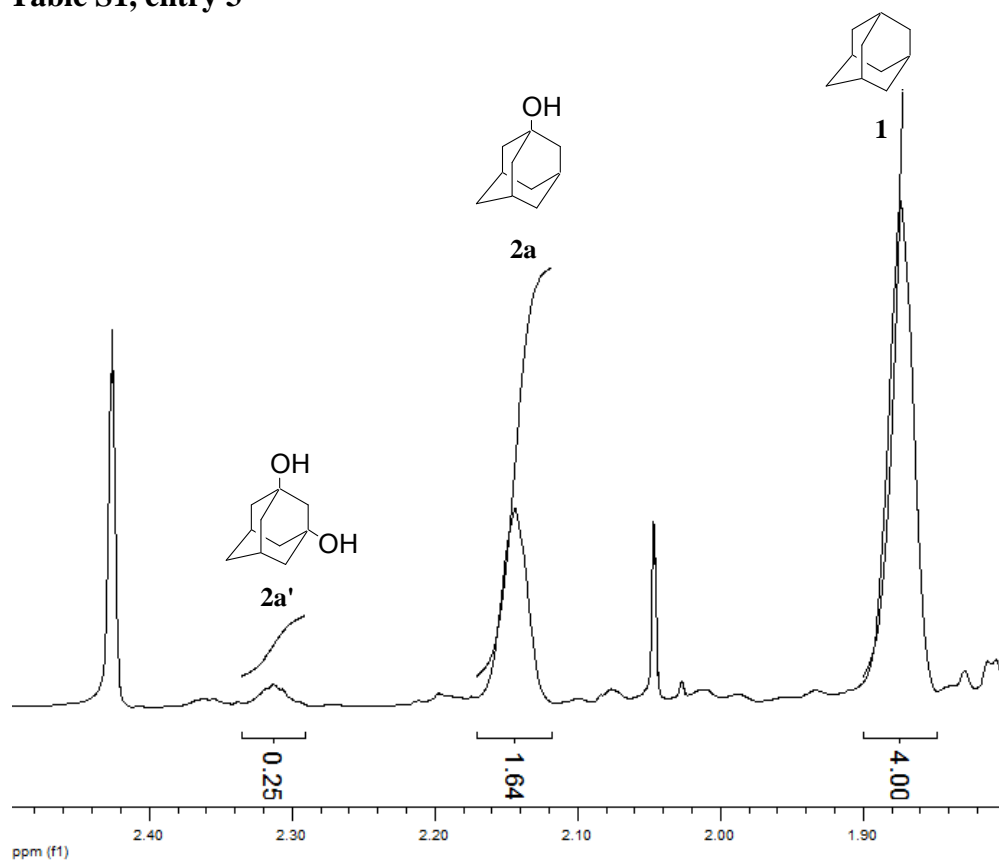

**Table S2, entry 2**

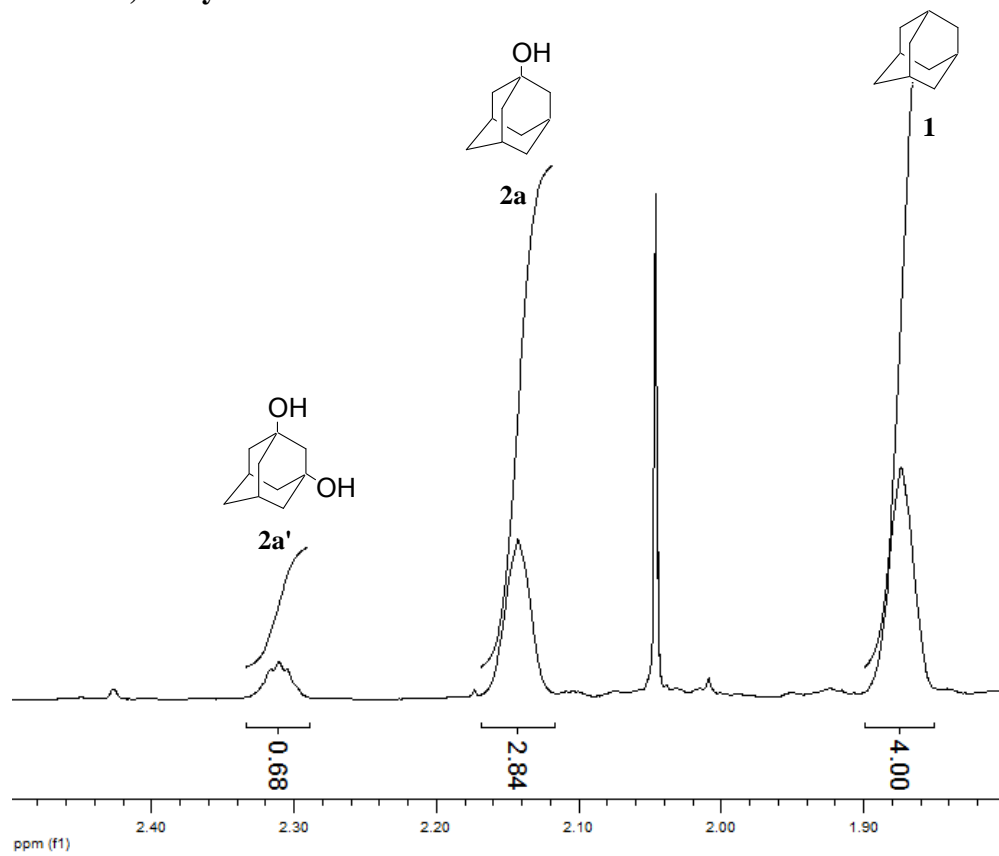

**Table S2, entry 3**

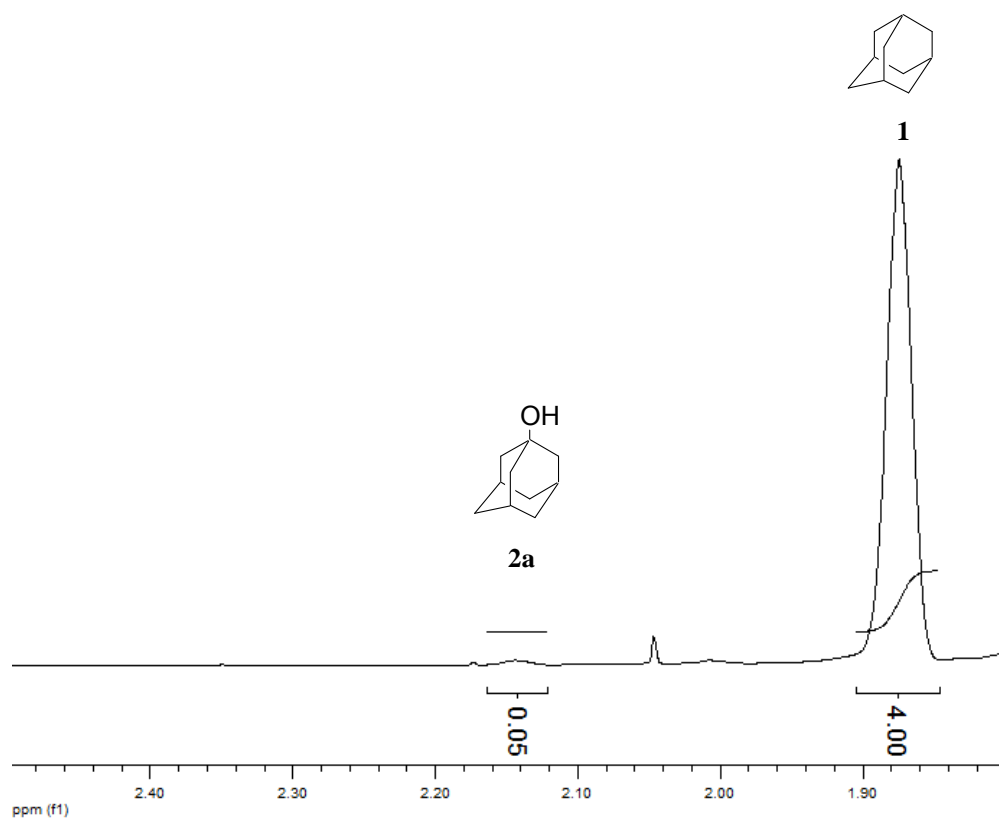

**Table S2, entry 4**

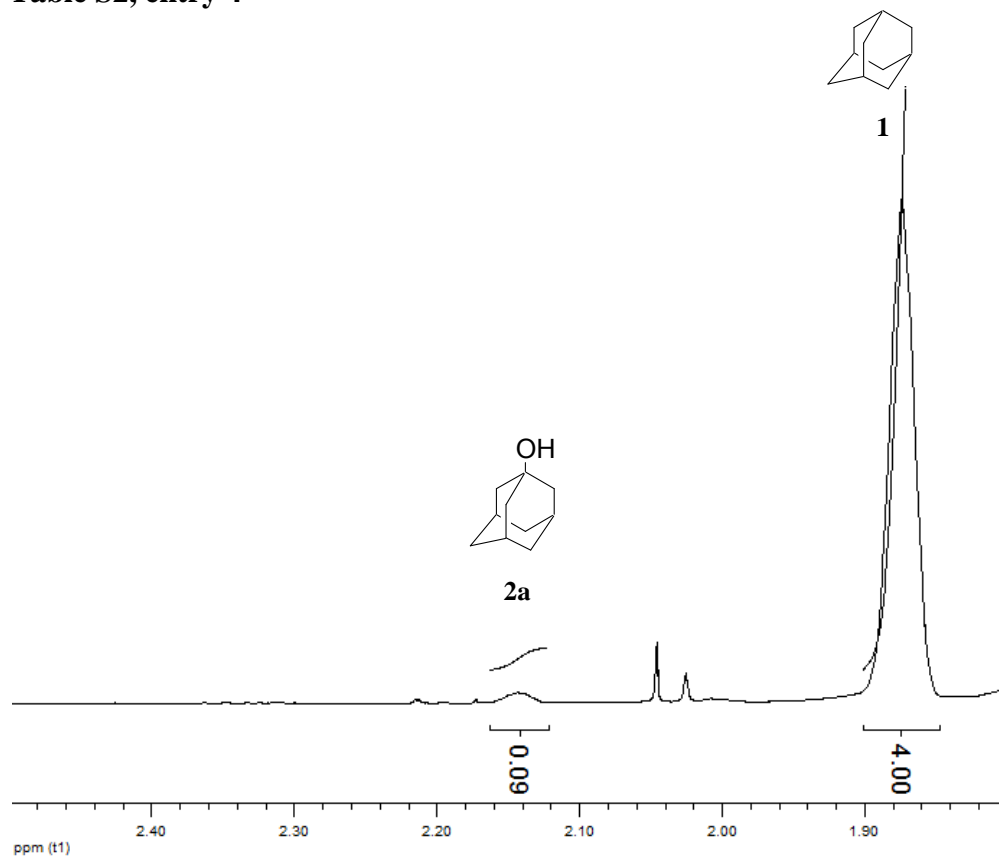

**Table S2, entry 5**

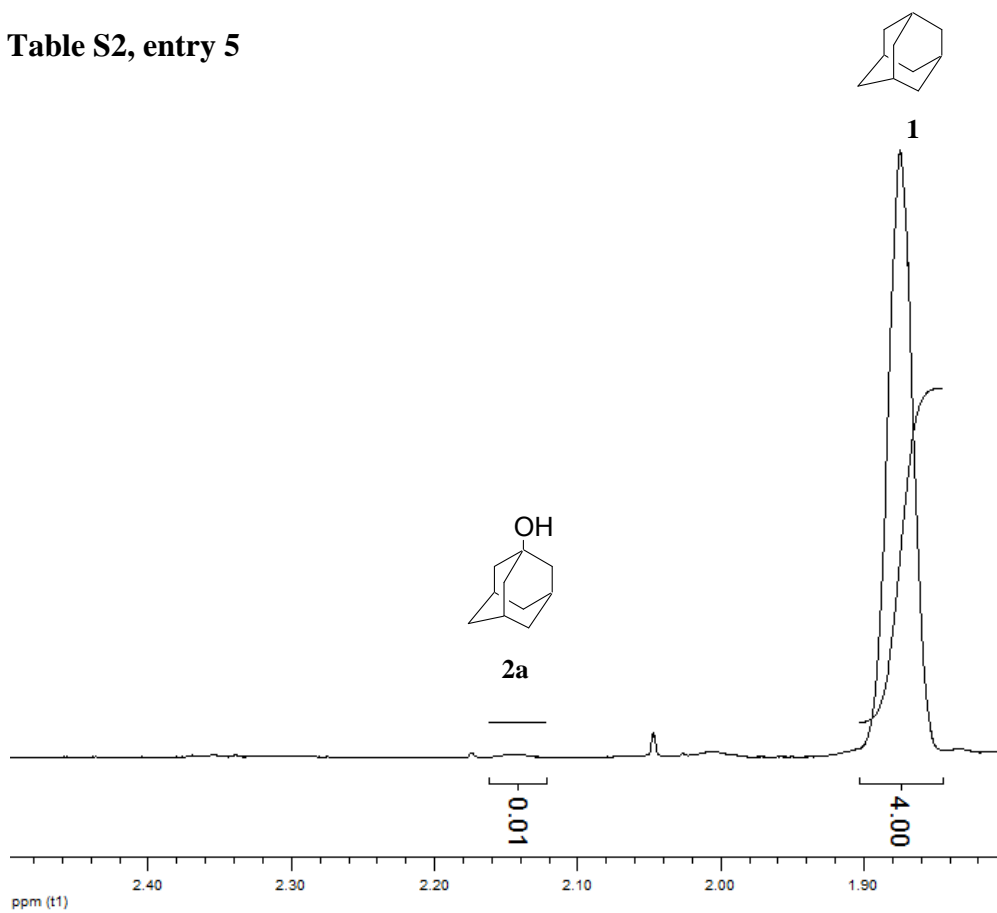

**Table S3, entry 2**

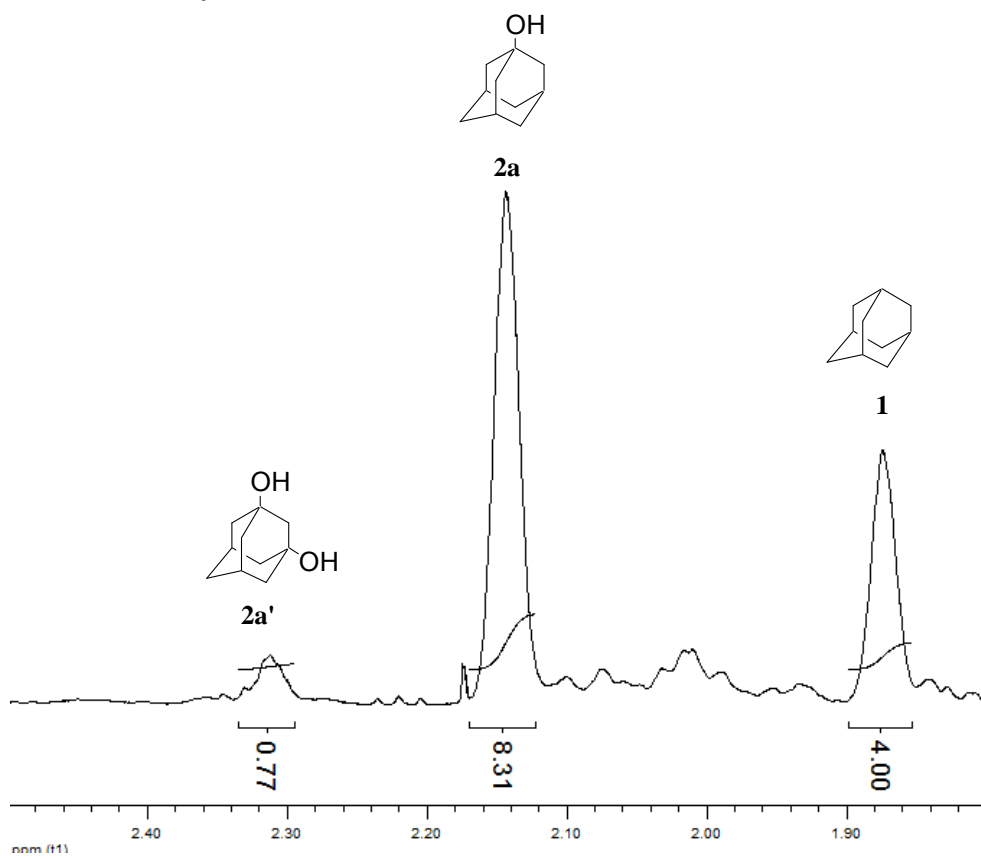

**Table S3, entry 4**

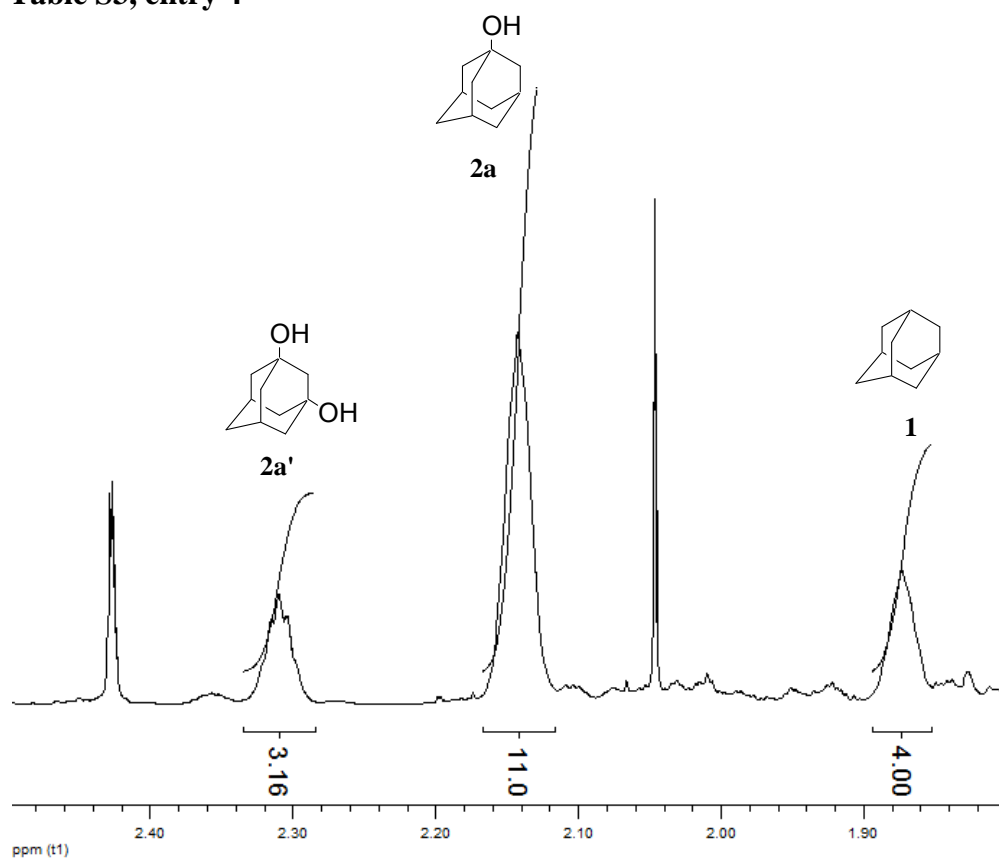

**Table S3, entry 5**

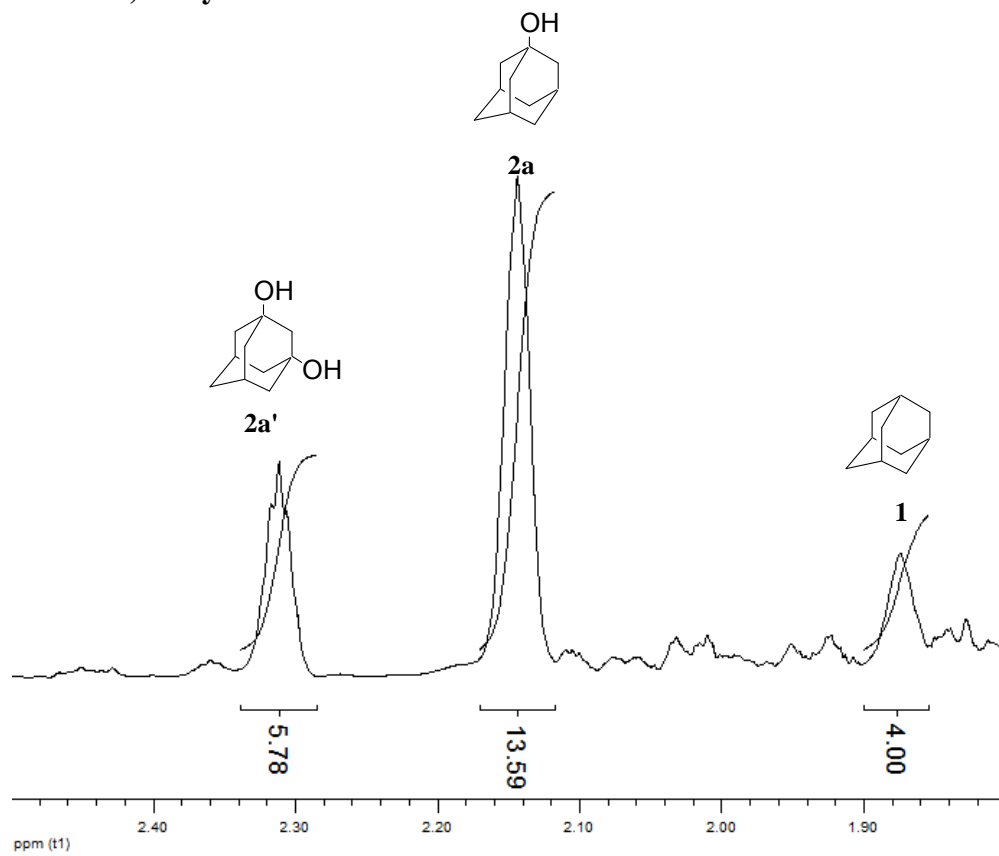

Table S4, entry 1

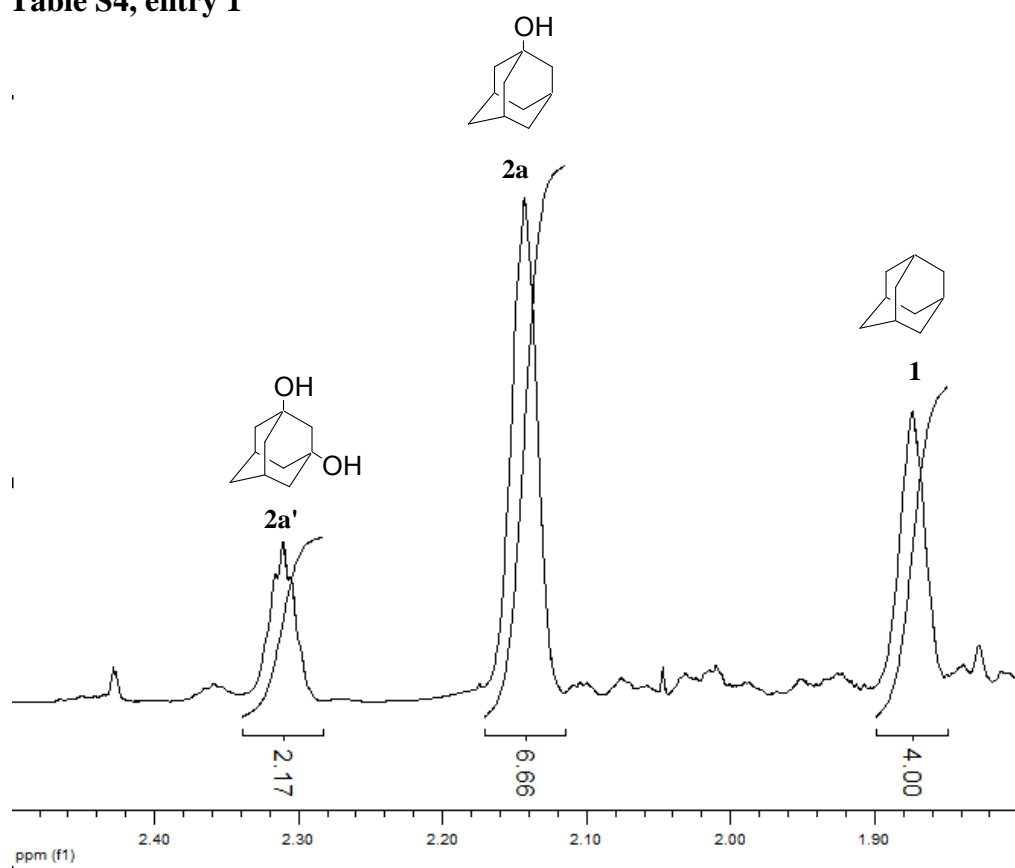

Table S4, entry 3

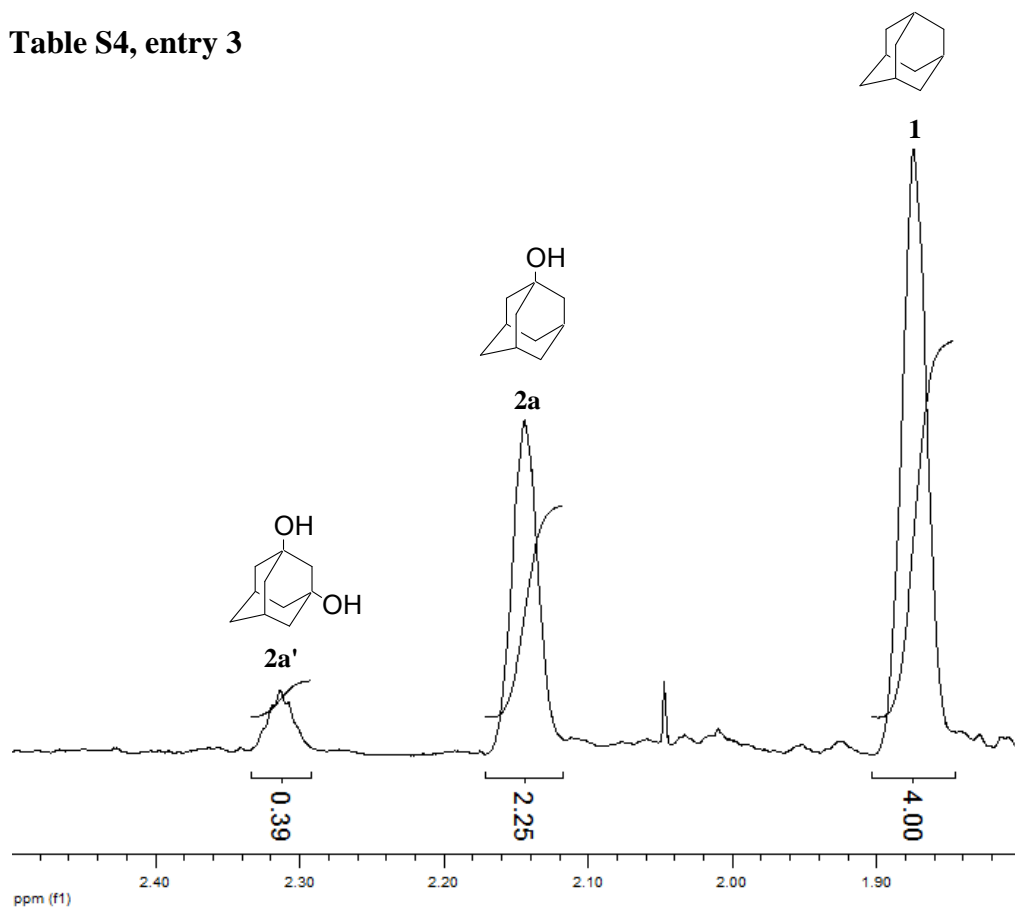

**Table S4, entry 4**

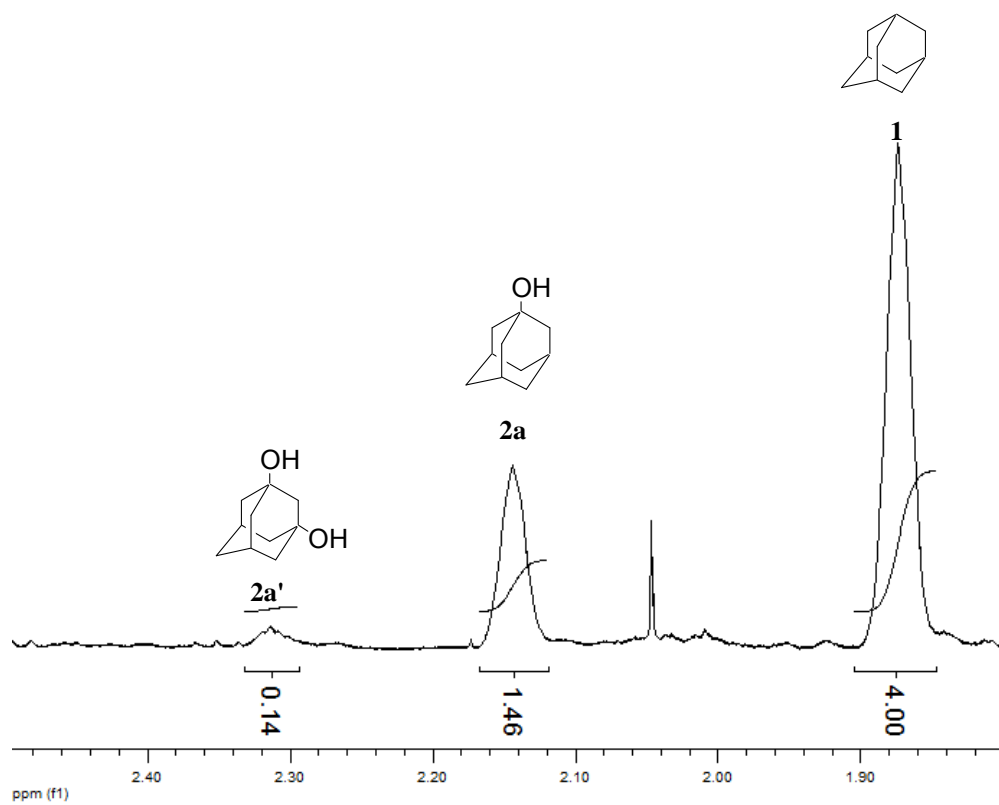



**Table S5, entry 1**

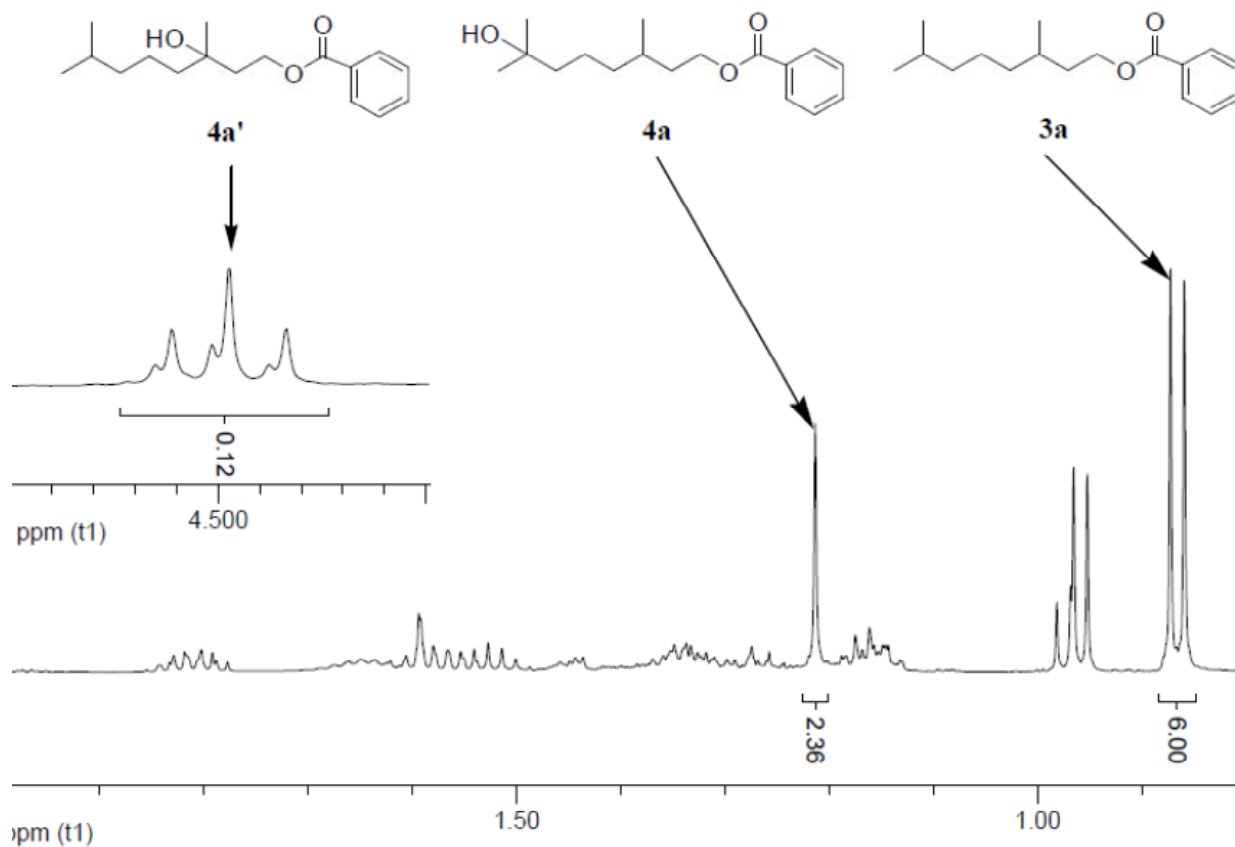

**Ratio of 3a : 4a : 4a'(Table S5, entry 1)**

$$= [6/6 \div (6/6 + 2.36/6 + 0.12/2) \times 100] : [2.36/6 \div (6/6 + 2.36/6 + 0.12/2) \times 100] : [0.12/2 \div (6/6 + 2.36/6 + 0.12/2) \times 100]$$

$$= 69 : 27 : 4$$

**Table S5, entry 2**

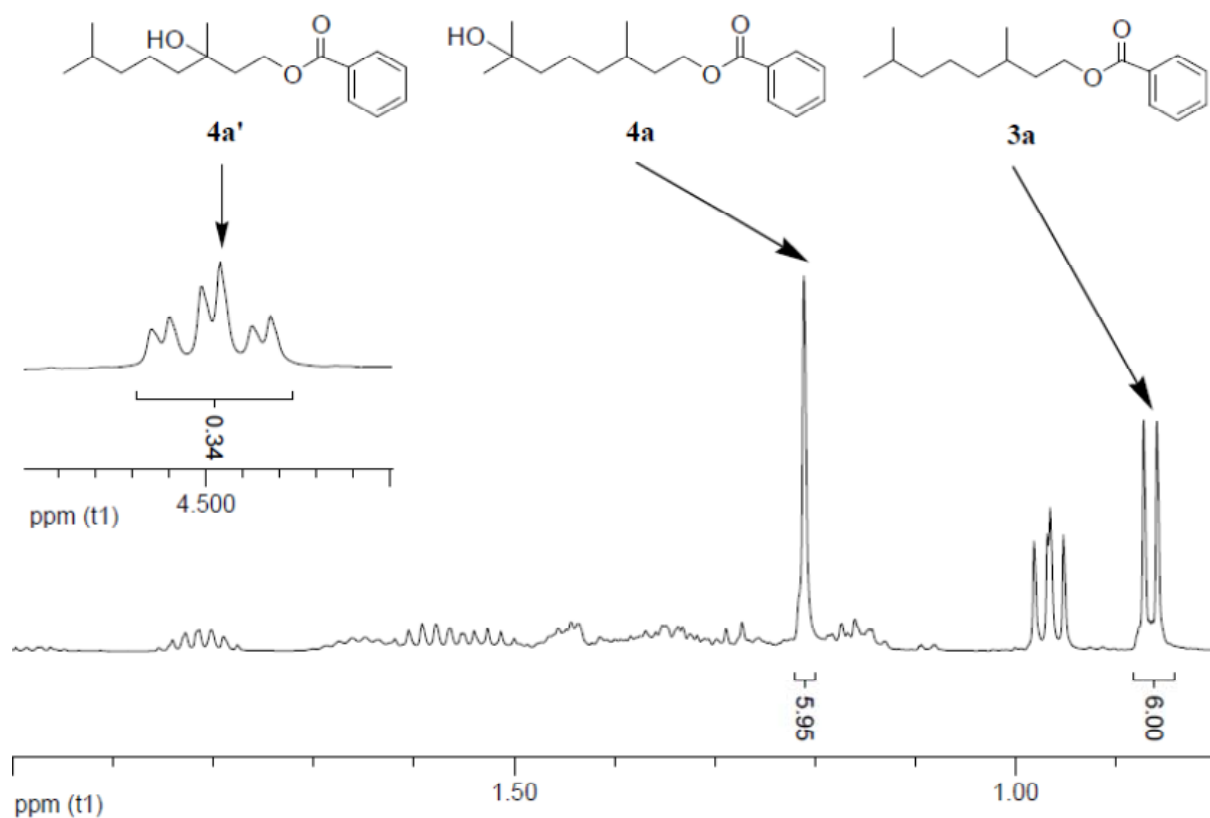

**Table S6, entry 1**

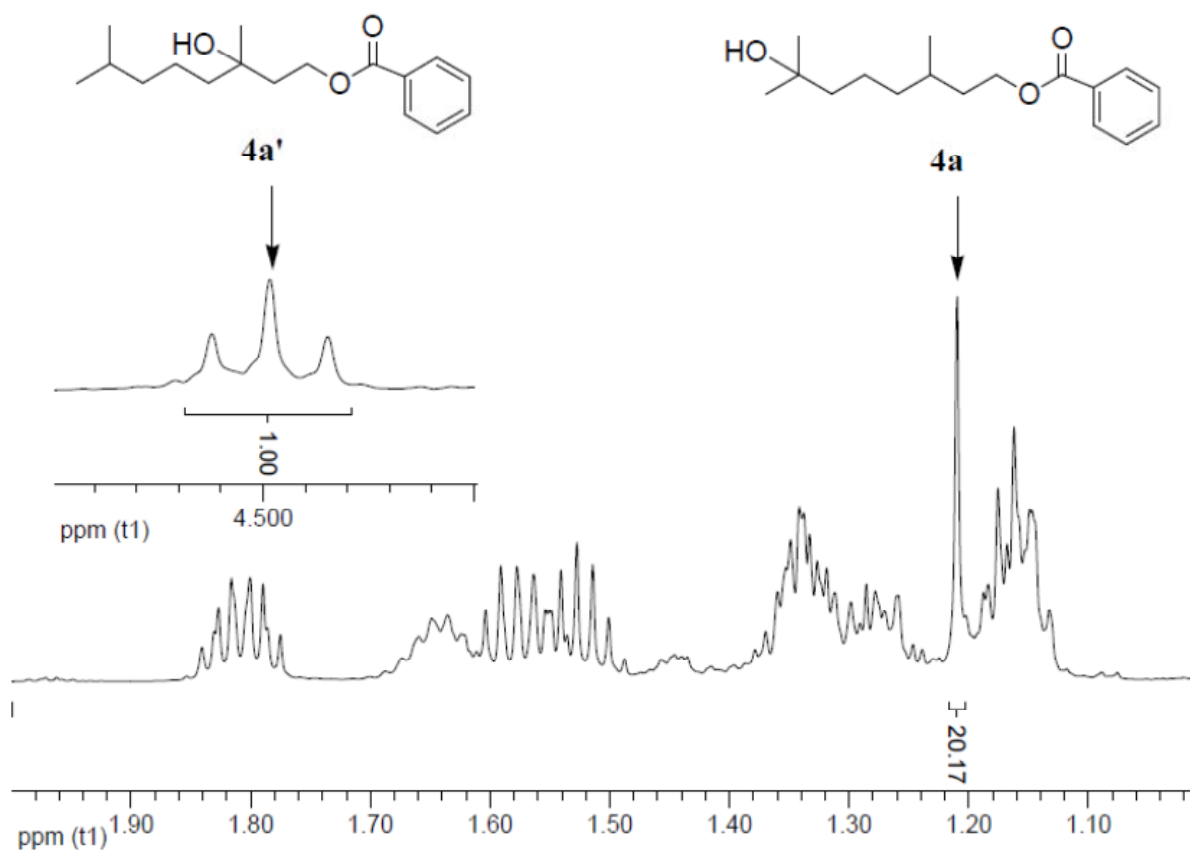

**Table S6, entry 2**

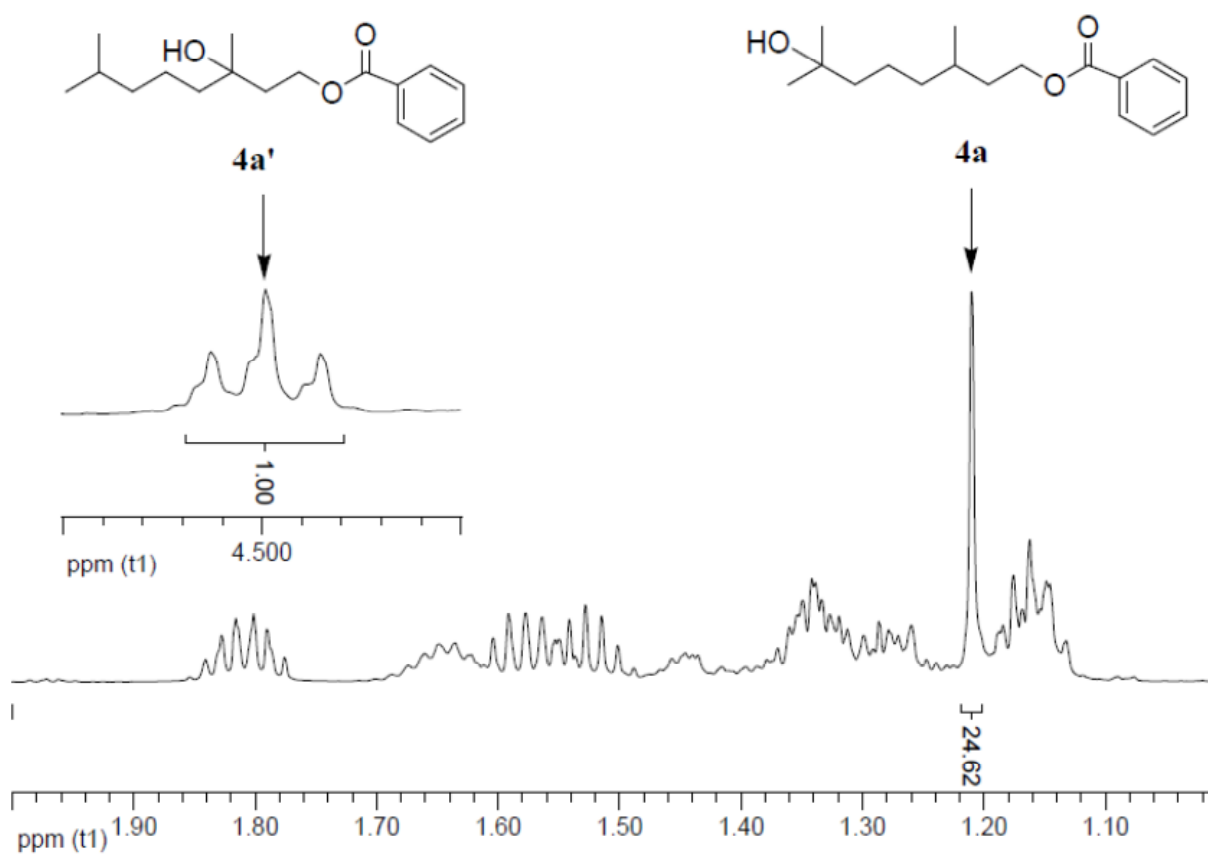

**Table S6, entry 4**

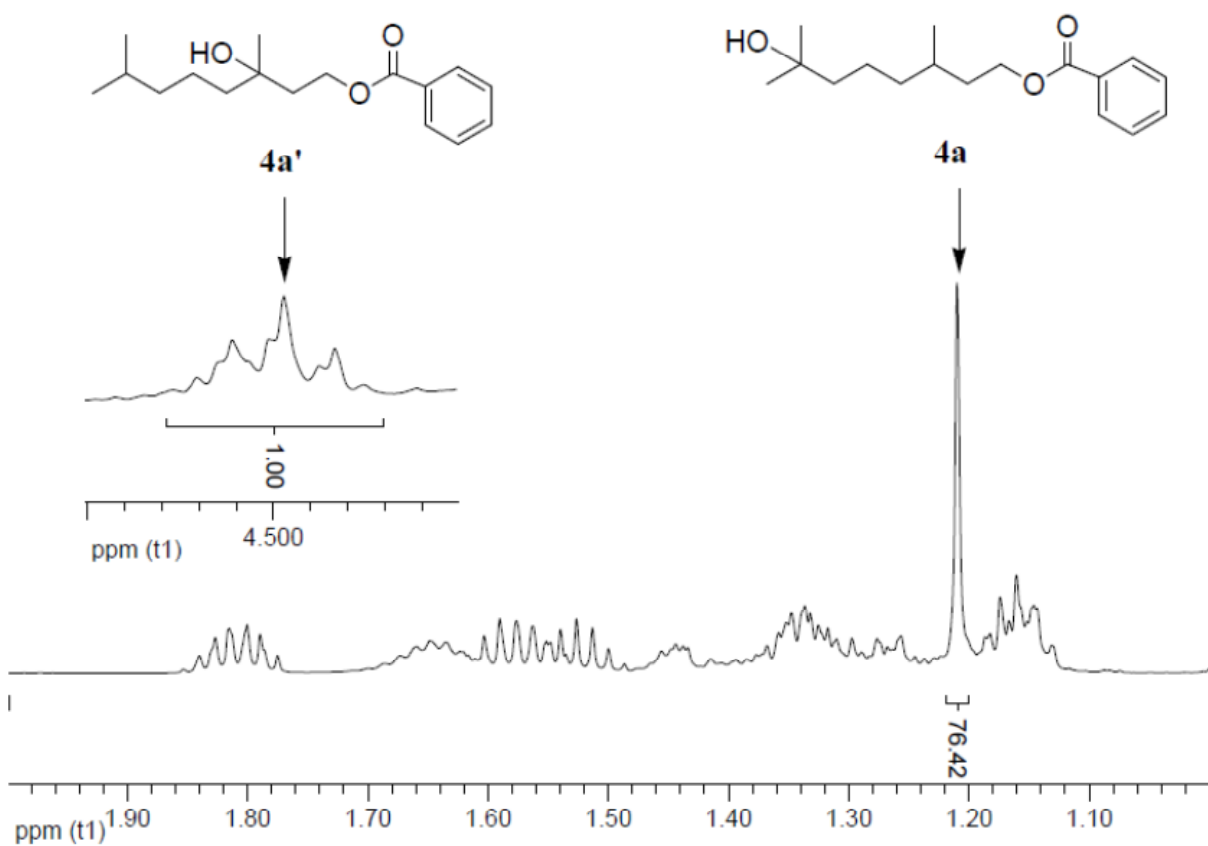

**Table S6, entry 5**

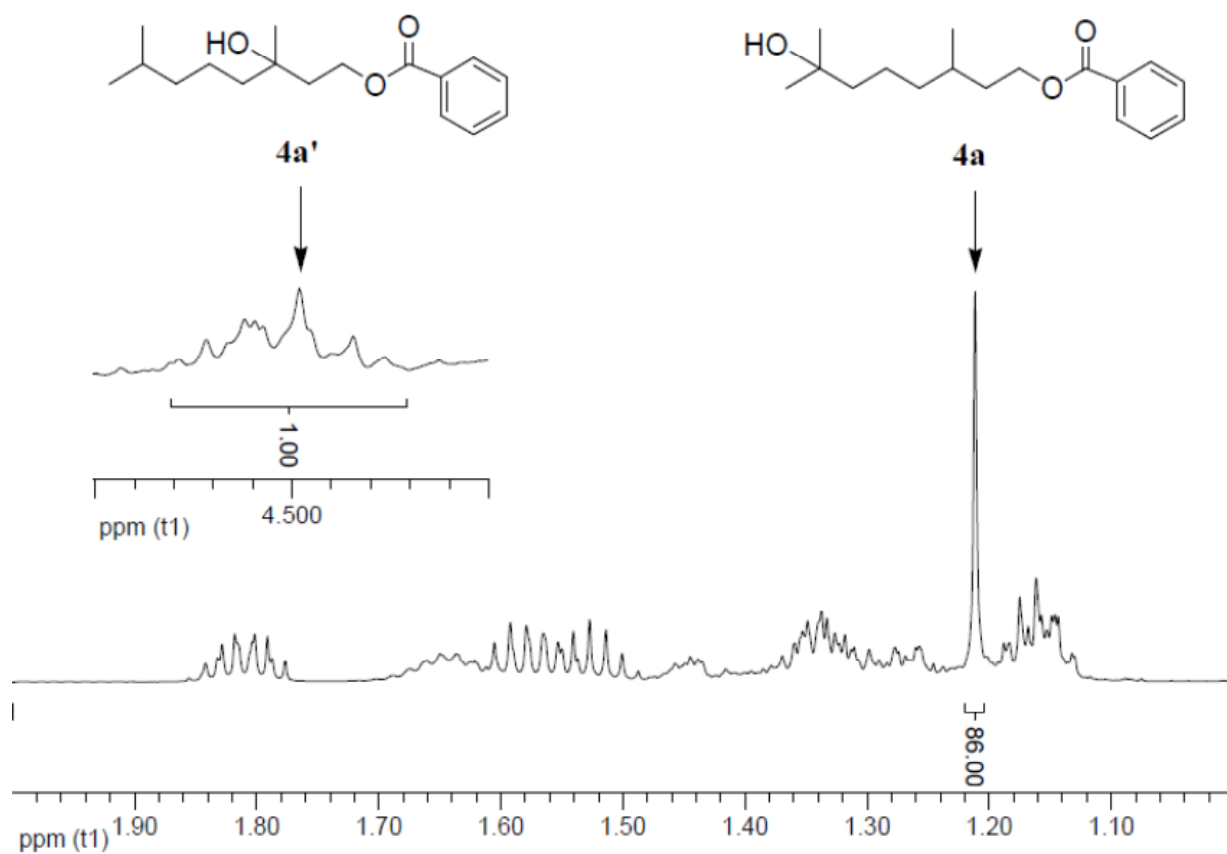

**Table S6, entry 6**

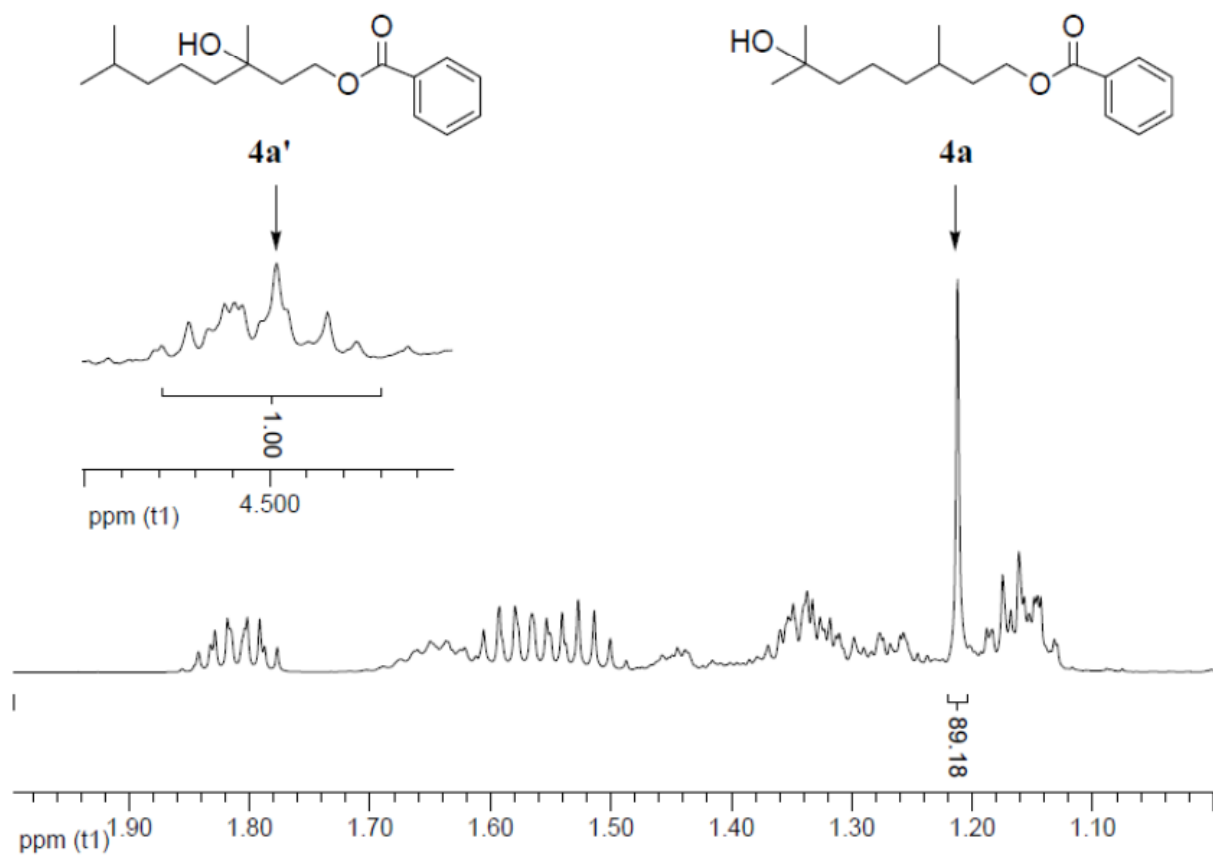

### Partial contour plot of 2D ROESY spectrum for binding of **5a** to $\beta$ -CD in D<sub>2</sub>O.

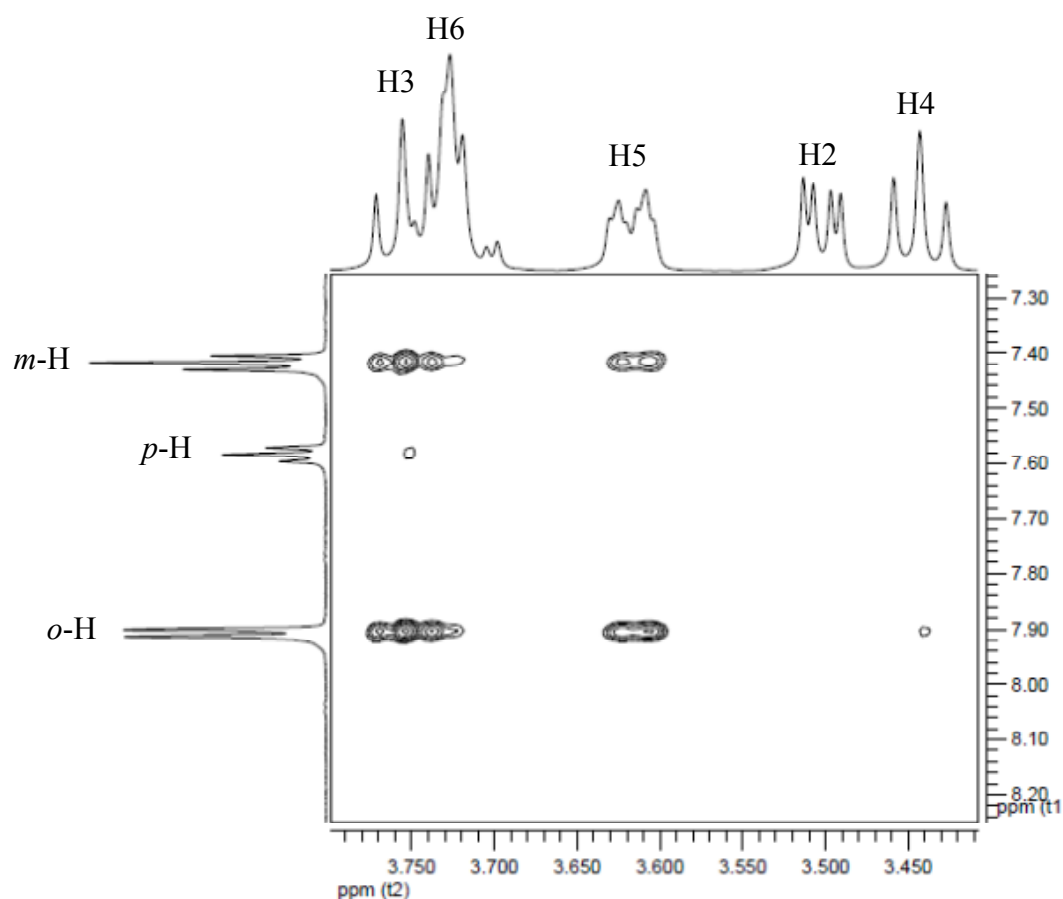

Based on the 2D ROESY spectrum of the binding of **5a** to  $\beta$ -CD, strong NOE correlation signals of *o*-H and *m*-H of **5a** with H3 and H5 of  $\beta$ -CD and the absence of correlation signal of *p*-H of **5a** with protons of  $\beta$ -CD suggest that the phenyl group of **5a** is deeply inserted into the  $\beta$ -CD cavity and *p*-H of **5a** is exposed outside of the cavity. H6 of  $\beta$ -CD shows no NOE correlation signal with any protons of the phenyl group of **5a**, revealing that *p*-H of **5a** is exposed outside the secondary face of  $\beta$ -CD. Considering the 1 : 1 stoichiometry of the inclusion complexation between **3a** and  $\beta$ -CD, the possible binding geometry of the benzoate group of **5a** is proposed (Figure S16).

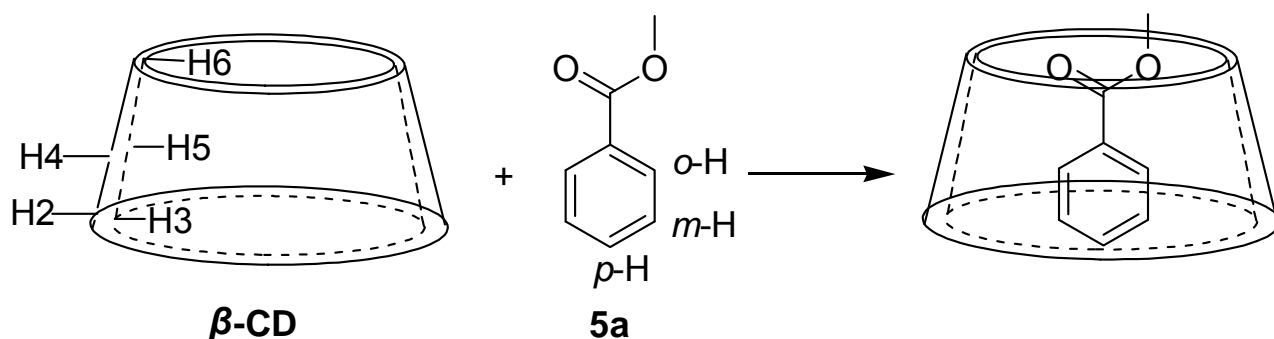

Figure S16. Proposed binding geometry for the inclusion of **5a** in  $\beta$ -CD.

**Partial contour plot of 2D ROESY spectrum for binding of 5b (*tert*-butyl moiety) to  $\beta$ -CD in  $D_2O$ .**

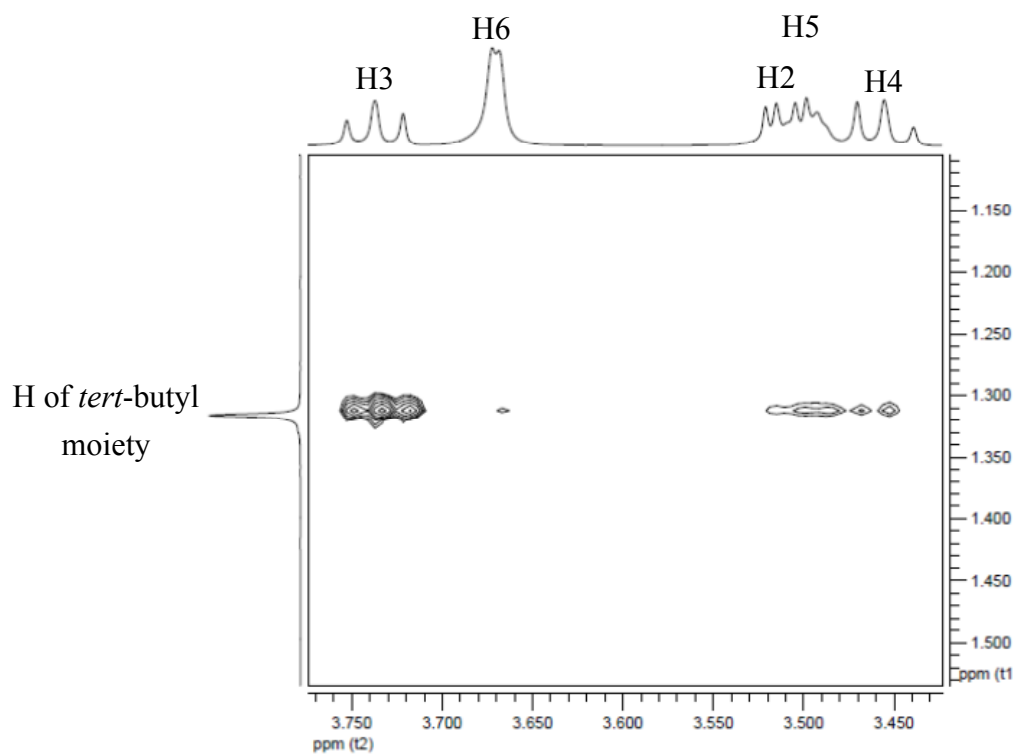

**Partial contour plot of 2D ROESY spectrum for binding of 5b (phenyl ring moiety) to  $\beta$ -CD in  $D_2O$ .**

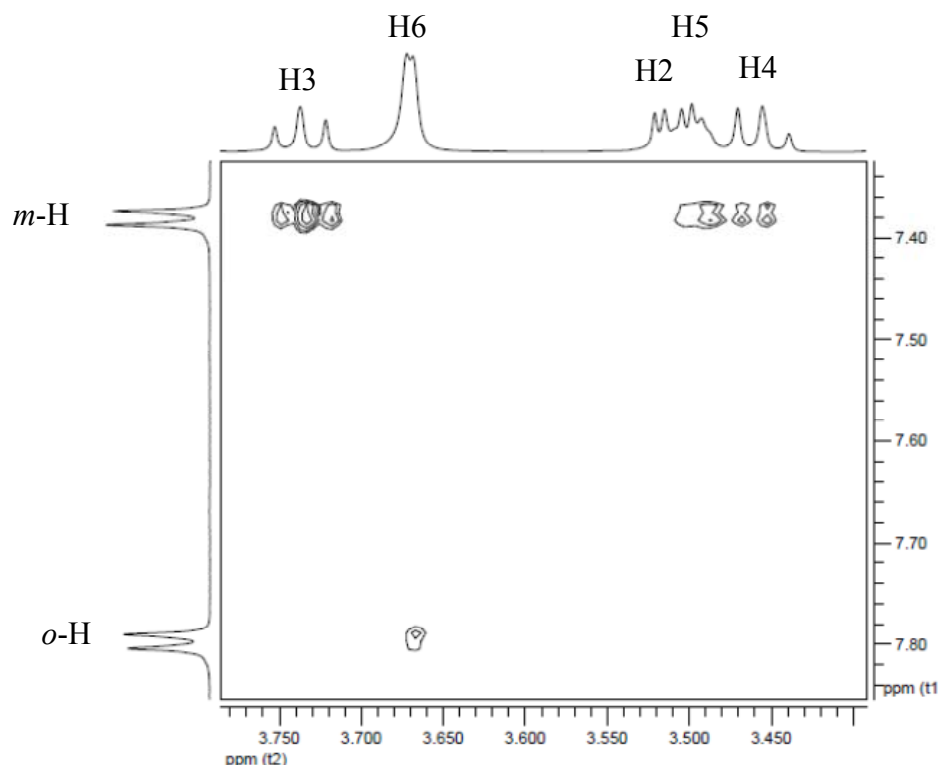

In the 2D ROESY spectrum for binding of **5b** to  $\beta$ -CD, the protons of the *tert*-butyl group and the protons at the *m*-position of the phenyl ring of **5b** have strong NOE correlation signals with H3 and H5 of  $\beta$ -CD while the protons at the *o*-position of the phenyl ring of **5b** only exhibits weak correlation signal with H6 of  $\beta$ -CD. This suggests that **5b** inserts into  $\beta$ -CD from the primary face. The *tert*-butyl group of **5b** is included in the  $\beta$ -CD cavity, and just half of the phenyl ring is inserted to the  $\beta$ -CD cavity. As the stoichiometry for the formation of inclusion complex of **3b** and  $\beta$ -CD is 1 : 1, the possible binding geometry of the 4-*tert*-butylbenzoate moiety of **5b** is proposed in Figure S17.

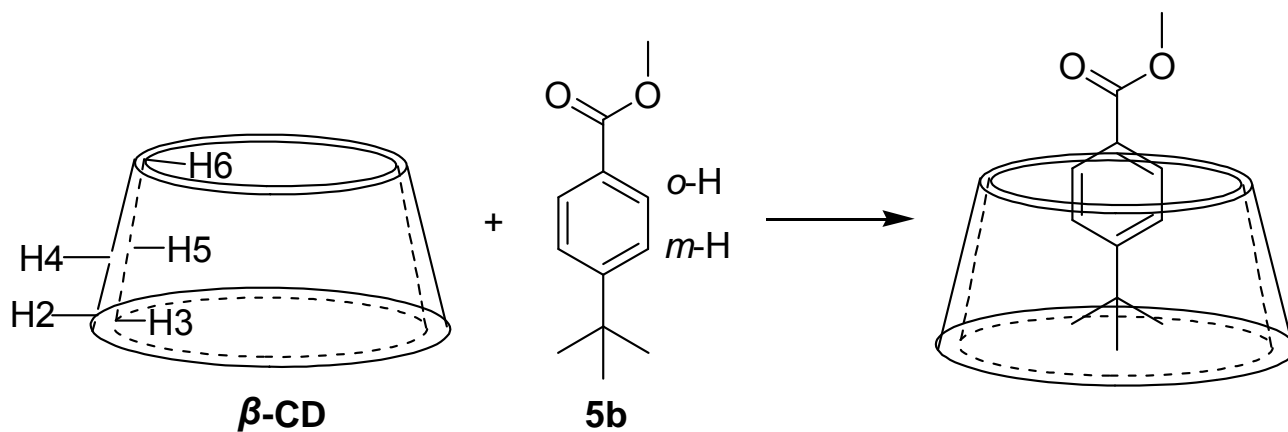

**Figure S17.** Proposed binding geometry for the inclusion of **5b** in  $\beta$ -CD.

### Partial contour plot of 2D ROESY spectrum for binding of **5c** to $\beta$ -CD in $D_2O$ .

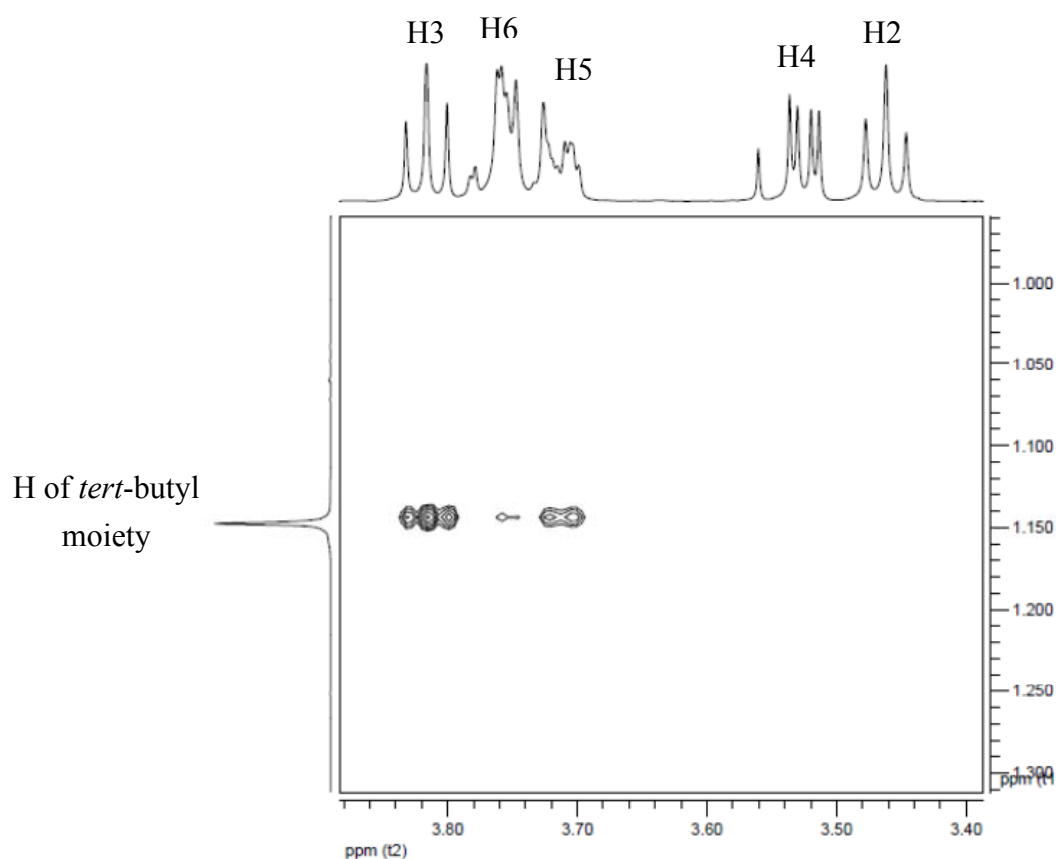

From the 2D ROESY spectrum for binding of **5c** to  $\beta$ -CD, the protons of the *tert*-butyl group of **5c** have NOE correlation signals with H3, H5, and H6 of  $\beta$ -CD with different intensities. The NOE signal between the protons of the *tert*-butyl group and H3 is the strongest, and that between the protons of the *tert*-butyl group and H5 is moderate, while that between the protons of the *tert*-butyl group and H6 is the weakest. Based on these findings, it was proposed that the *tert*-butyl group of **5c** enters the cavity of  $\beta$ -CD from the secondary face, unlike **5a** and **5b**. As the stoichiometry for formation of inclusion complex of **3c** and  $\beta$ -CD is 1 : 1, the possible binding geometry of the *tert*-butyl group of **5c** to  $\beta$ -CD is suggested (Figure S18).

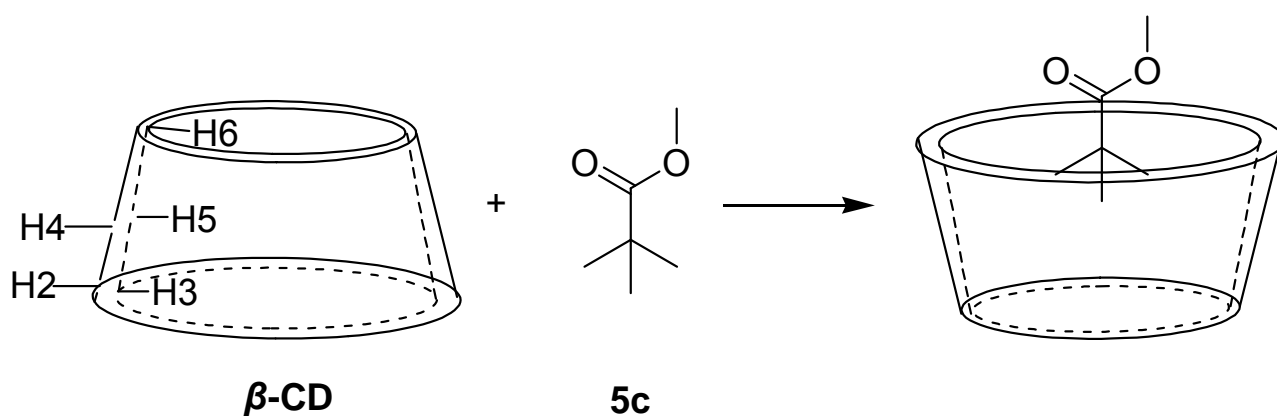

**Figure S18.** Proposed binding geometry for the inclusion of **5c** in  $\beta$ -CD.



### Partial contour plot of 600 MHz 2D ROESY spectrum for binding of **3d** to $\beta$ -CD in $D_2O$ .

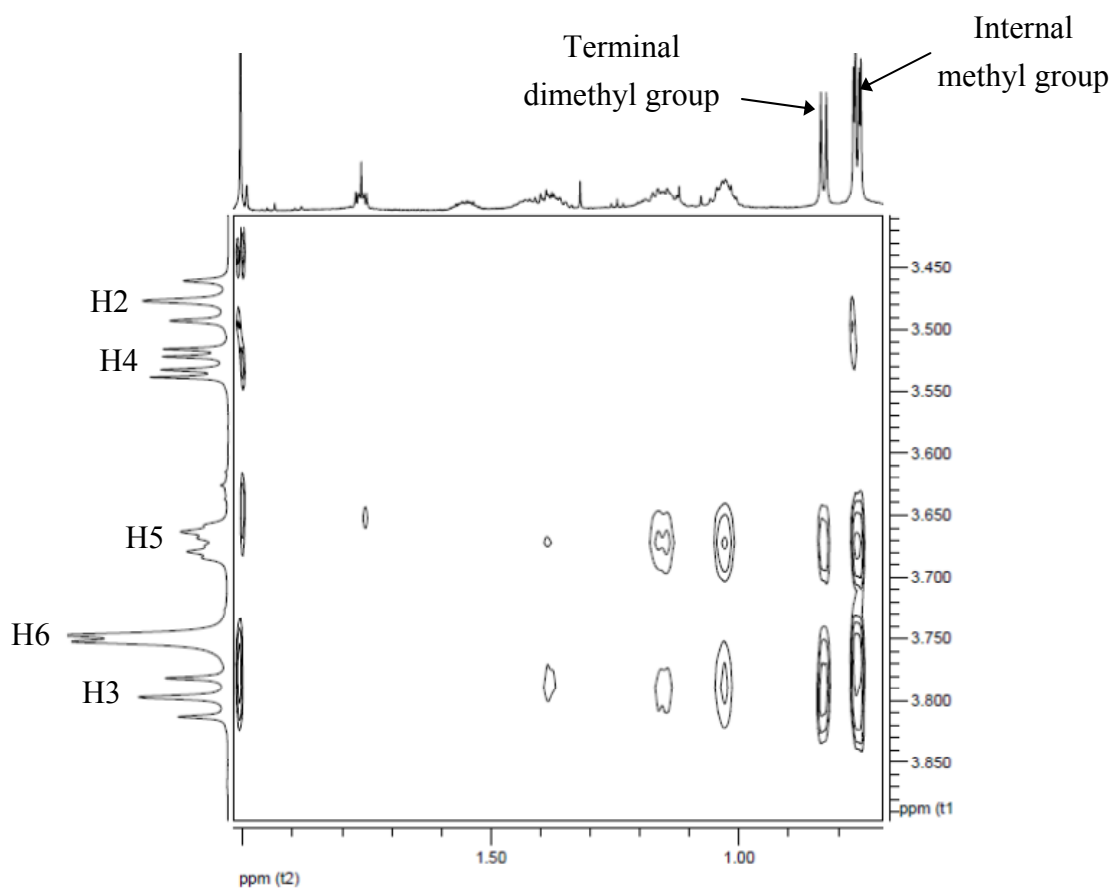

From the 2D ROESY spectrum of the binding of **3d** to  $\beta$ -CD, strong NOE signals of the 3,7-dimethyloctyl chain of **3d** with H3, H5, and H6 of  $\beta$ -CD suggest that the 3,7-dimethyloctyl chain of **3d** is included into the cavity of  $\beta$ -CD. The NOE signal of the terminal dimethyl group of **3d** with H5 and H6 of  $\beta$ -CD is more intense than that with H3 of  $\beta$ -CD, and the internal methyl group of **3d** have more intense signal with H3 than with H5. This reveals that the terminal dimethyl group is close to the primary face, and the internal methyl group is close to the secondary face. Based on the 2 : 1 stoichiometry of the inclusion complex between **3d** and  $\beta$ -CD, the binding geometry is proposed as Figure S19.

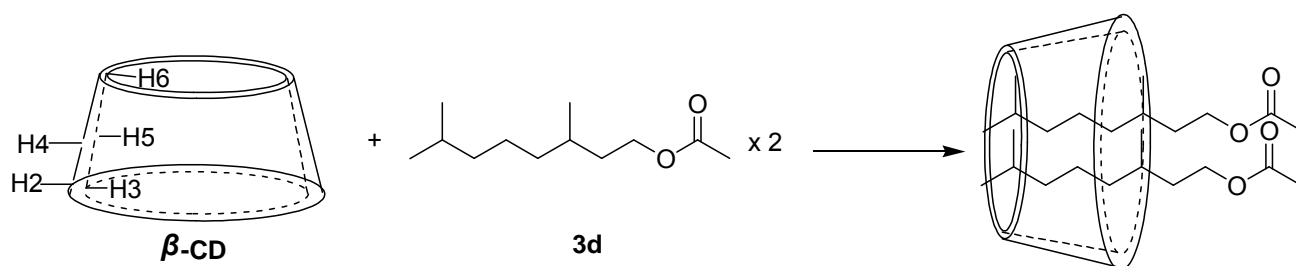

**Figure S19.** Proposed binding geometry for the inclusion of **3d** in  $\beta$ -CD.

## Calibration Curve for GC Analysis

(a) Cumene (**6a**) and cumyl alcohol (**7a**) (25 – 800 ppm), internal standard: n-decane (5040 ppm)

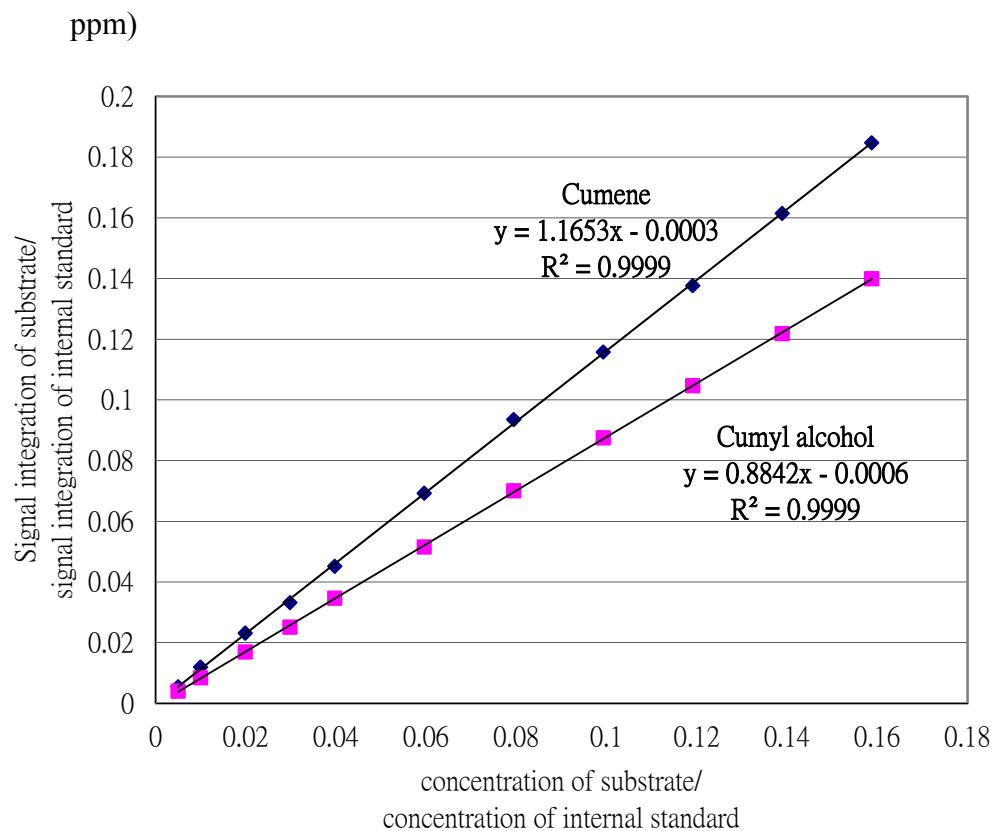

(b) Ethyl benzene (**6b**) and acetophenone (**7b**) (25 – 975 ppm), internal standard: n-decane (504

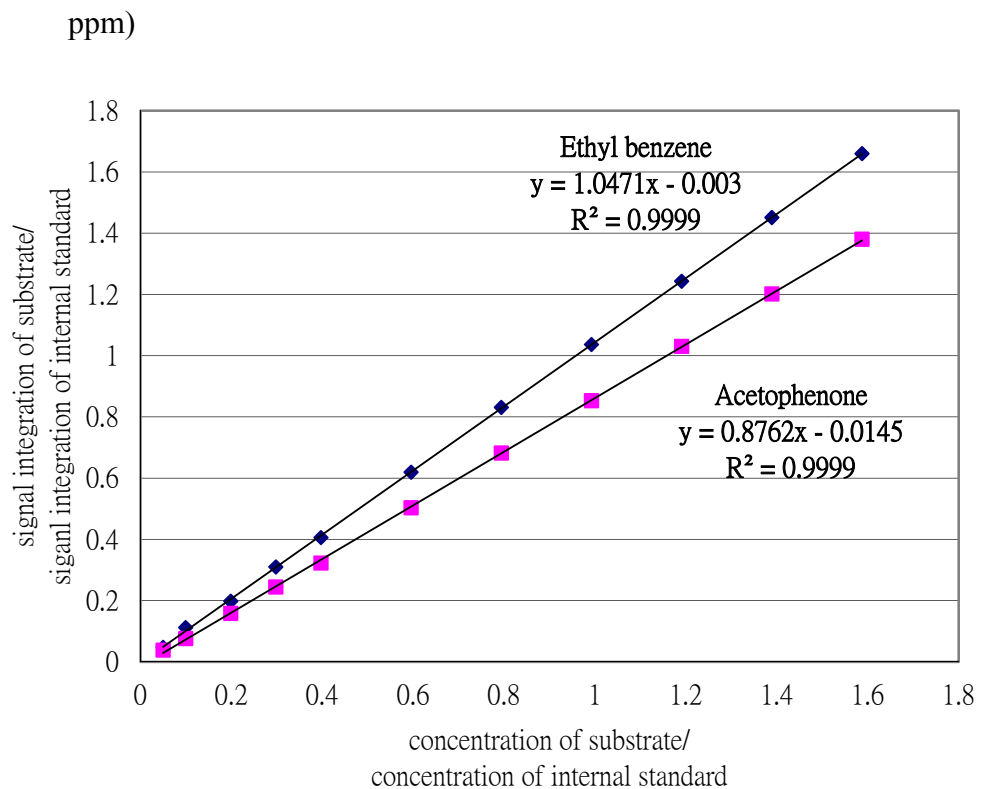

## Chromatogram of C-H bond Oxidation of 6a and 6b

### (a) Oxidation of 6a in H<sub>2</sub>O with $\beta$ -CD

Temperature program: The temperature initially stayed at 105 °C for 3 min, then rose to 110 °C at the rate of 70 °C per min, and finally stayed at 110 °C for 3 min.

Concentration of internal standard: 3111 ppm

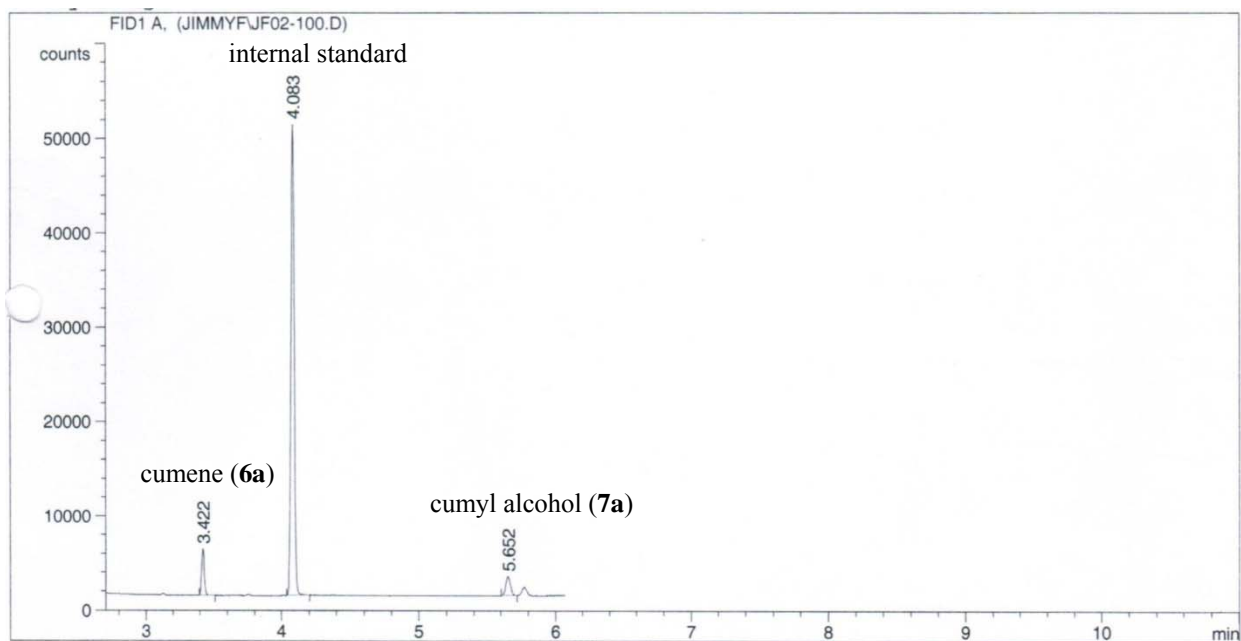

=====  
Area Percent Report  
=====

Reported By : Signal  
Multiplier : 1.0000  
Dilution : 1.0000

Signal 1: FID1 A,

| Peak # | RetTime [min] | Type | Width [min] | Area counts*s | Height [counts] | Area %   |
|--------|---------------|------|-------------|---------------|-----------------|----------|
| 1      | 3.422         | BB   | 0.0220      | 6805.32422    | 4972.39062      | 7.14136  |
| 2      | 4.083         | BB   | 0.0265      | 8.35267e4     | 4.99685e4       | 87.65111 |
| 3      | 5.652         | BV   | 0.0362      | 4962.49072    | 2050.17944      | 5.20753  |

Totals : 9.52945e4 5.69911e4

Results obtained with enhanced integrator!

=====  
\*\*\* End of Report \*\*\*

## (b) Oxidation of 6a in H<sub>2</sub>O

Temperature program: The temperature initially stayed at 105 °C for 3 min, then rose to 110 °C at the rate of 70 °C per min, and finally stayed at 110 °C for 3 min.

Concentration of internal standard: 3111 ppm

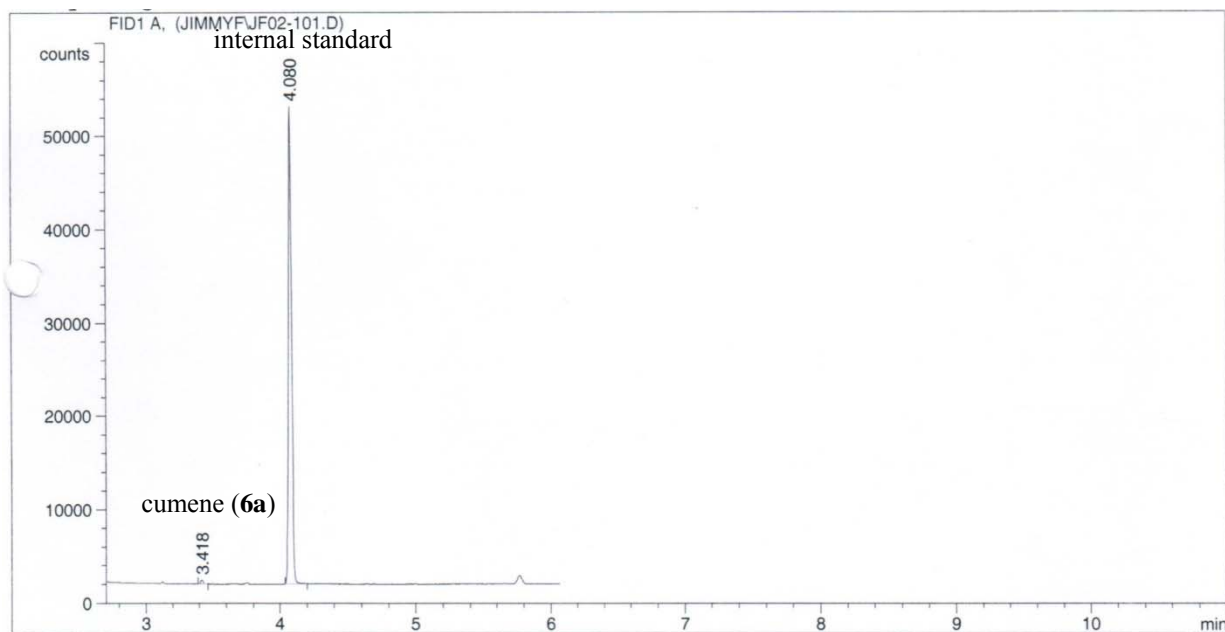

=====  
Area Percent Report  
=====

Sorted By : Signal  
Multiplier : 1.0000  
Dilution : 1.0000

Signal 1: FID1 A,

| Peak # | RetTime [min] | Type | Width [min] | Area counts*s | Height [counts] | Area %   |
|--------|---------------|------|-------------|---------------|-----------------|----------|
| 1      | 3.418         | PB   | 0.0211      | 553.42493     | 426.21051       | 0.65376  |
| 2      | 4.080         | BB   | 0.0262      | 8.40989e4     | 5.11577e4       | 99.34624 |

Totals : 8.46523e4 5.15840e4

Results obtained with enhanced integrator!

=====  
\*\*\* End of Report \*\*\*

**(c) Oxidation of 6a in H<sub>2</sub>O/CH<sub>3</sub>CN without β-CD**

Temperature program: The temperature initially stayed at 100 °C for 3 min, then rose to 110 °C at the rate of 70 °C per min, and finally stayed at 110 °C for 3 min.

Concentration of internal standard: 311 ppm

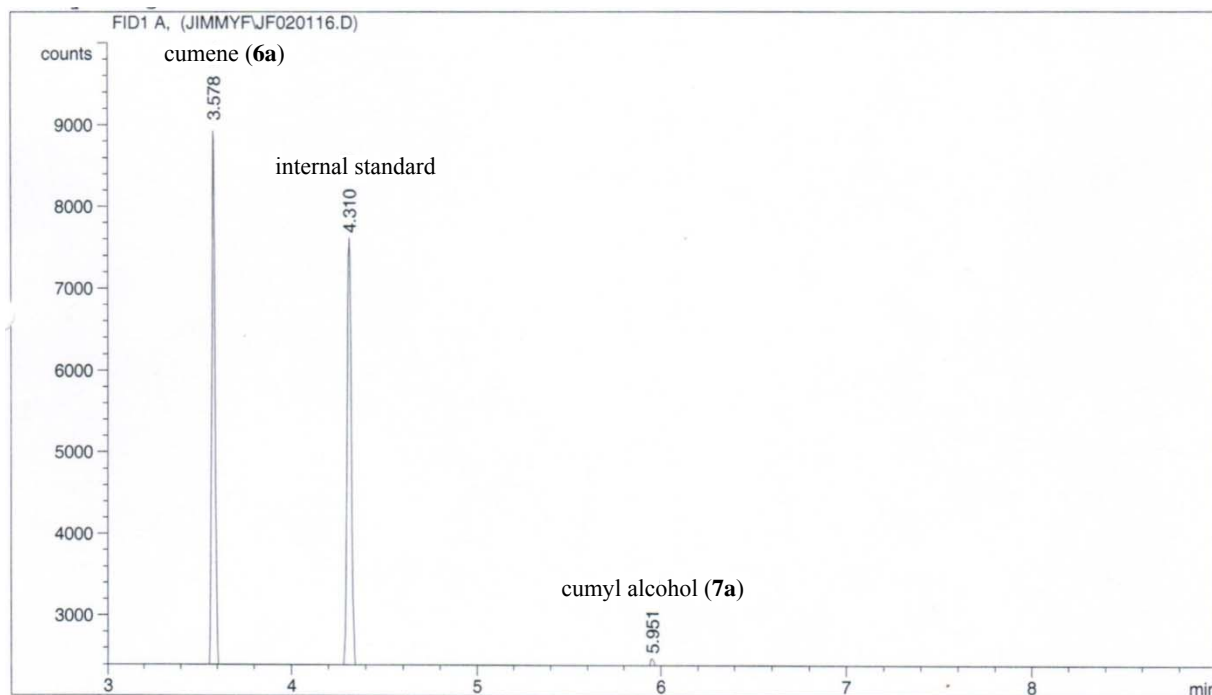

=====  
Area Percent Report  
=====

Sorted By : Signal  
Multiplier : 1.0000  
Dilution : 1.0000

Signal 1: FID1 A,

| Peak # | RetTime [min] | Type | Width [min] | Area counts*s | Height [counts] | Area %   |
|--------|---------------|------|-------------|---------------|-----------------|----------|
| 1      | 3.578         | BV   | 0.0198      | 8487.38379    | 6696.82227      | 47.50764 |
| 2      | 4.310         | VB   | 0.0262      | 8798.01367    | 5352.95313      | 49.24637 |
| 3      | 5.951         | BP   | 0.0315      | 579.90680     | 246.19954       | 3.24599  |

Totals : 1.78653e4 1.22960e4

Results obtained with enhanced integrator!

=====  
\*\*\* End of Report \*\*\*

### (d) Oxidation of 6b in H<sub>2</sub>O with β-CD

Temperature program: The temperature initially stayed at 100 °C for 3 min, then rose to 180 °C at the rate of 70 °C per min, and finally stayed at 180 °C for 3 min.

Concentration of internal standard: 311 ppm

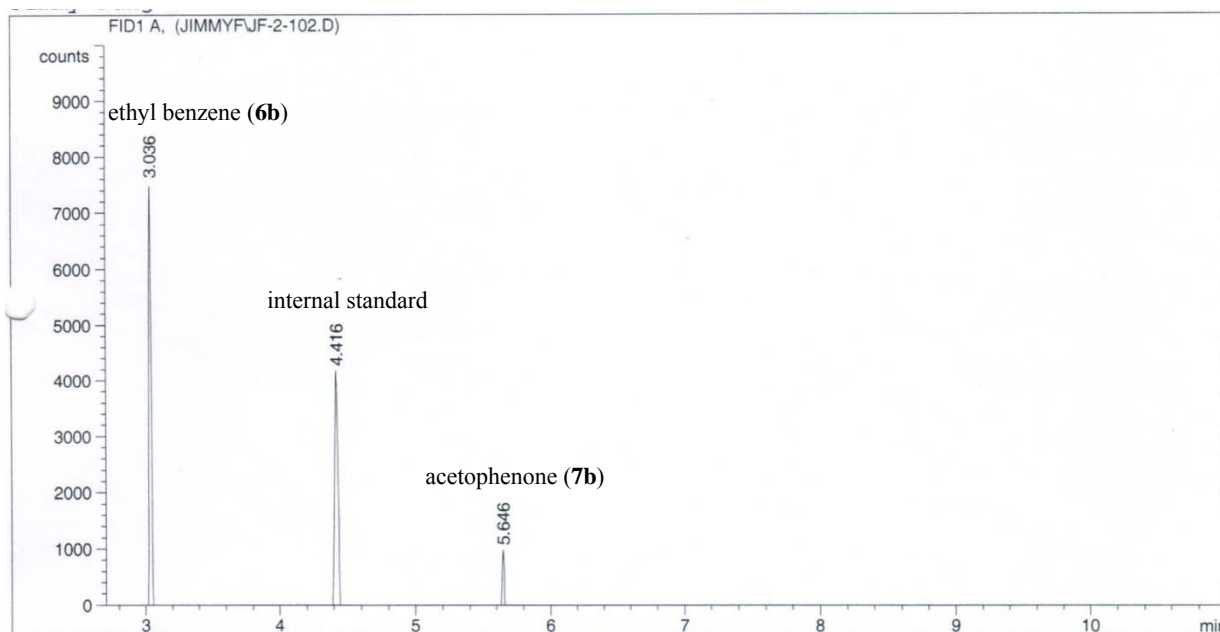

=====  
Area Percent Report  
=====

Reported By : Signal  
Multiplier : 1.0000  
Dilution : 1.0000  
Sample Amount : 1.00000 [ng/ul] (not used in calc.)

Signal 1: FID1 A,

| Peak # | RetTime [min] | Type | Width [min] | Area counts*s | Height [counts] | Area %   |
|--------|---------------|------|-------------|---------------|-----------------|----------|
| 1      | 3.036         | PB   | 0.0191      | 9496.75781    | 7858.29980      | 46.45183 |
| 2      | 4.416         | VB   | 0.0305      | 8946.07324    | 4647.00146      | 43.75825 |
| 3      | 5.646         | BP   | 0.0211      | 2001.48279    | 1447.86682      | 9.78992  |

Totals : 2.04443e4 1.39532e4

Results obtained with enhanced integrator!  
=====

### (e) Oxidation of 6b in H<sub>2</sub>O

Temperature program: The temperature initially stayed at 100 °C for 5 min, then rose to 180 °C at the rate of 70 °C per min, and finally stayed at 180 °C for 2 min.

Concentration of internal standard: 311 ppm

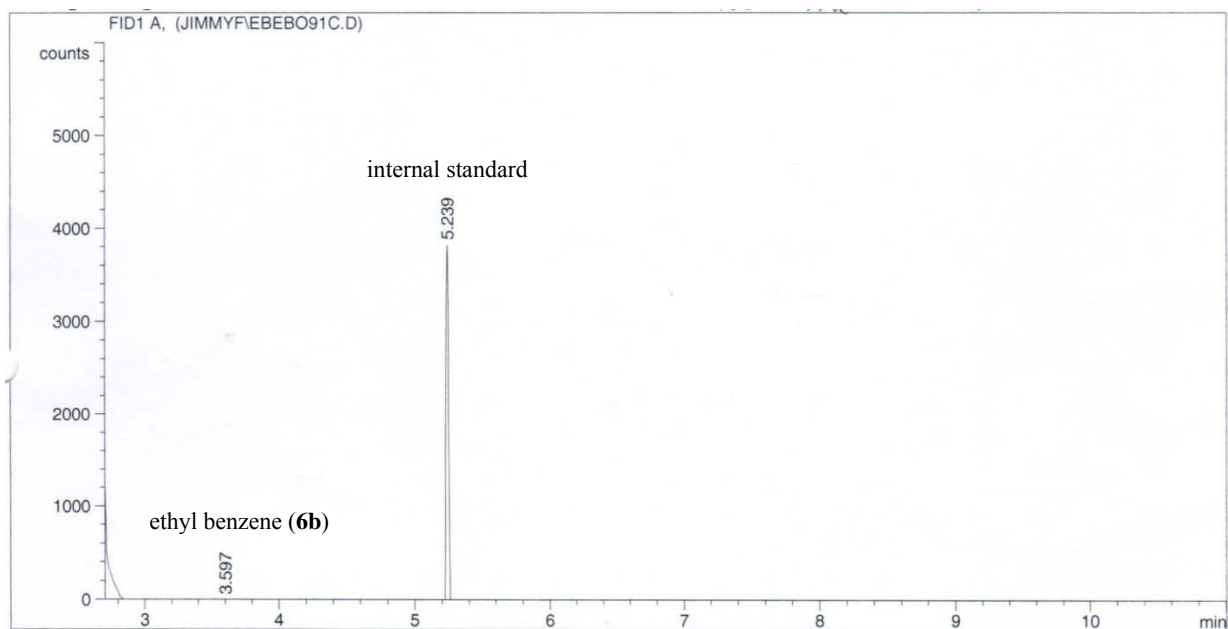

=====  
Area Percent Report  
=====

Sorted By : Signal  
Multiplier : 1.0000  
Dilution : 1.0000  
Sample Amount : 1.00000 [ng/ul] (not used in calc.)

Signal 1: FID1 A,

| Peak # | RetTime [min] | Type | Width [min] | Area counts*s | Height [counts] | Area %   |
|--------|---------------|------|-------------|---------------|-----------------|----------|
| 1      | 3.597         | BP   | 0.0217      | 354.67297     | 248.26387       | 4.74011  |
| 2      | 5.239         | BV   | 0.0247      | 7127.70703    | 4452.40576      | 95.25989 |

Totals : 7482.38000 4700.66963

Results obtained with enhanced integrator!

=====  
\*\*\* End of Report \*\*\*



**(f) Oxidation of 6b in H<sub>2</sub>O/CH<sub>3</sub>CN without β-CD**

Temperature program: The temperature initially stayed at 100 °C for 3 min, then rose to 180 °C at the rate of 70 °C per min, and finally stayed at 180 °C for 3 min.

Concentration of internal standard: 311 ppm

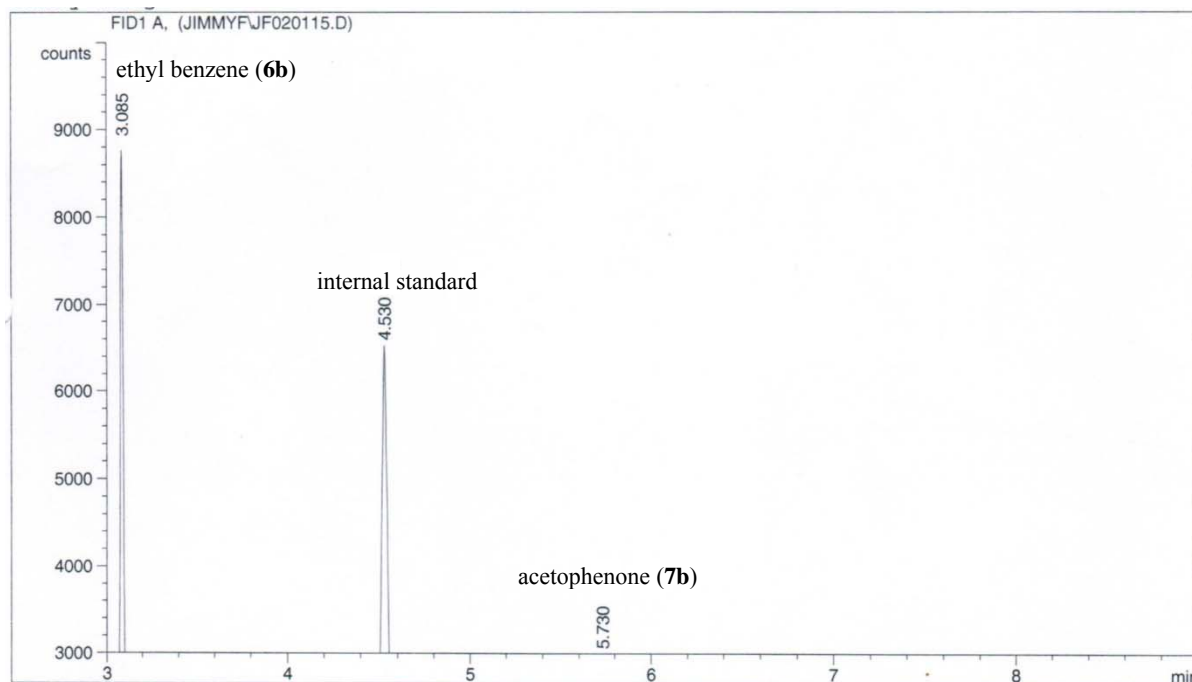

=====  
Area Percent Report  
=====

Sorted By : Signal  
Multiplier : 1.0000  
Dilution : 1.0000

Signal 1: FID1 A,

| Peak # | RetTime [min] | Type | Width [min] | Area counts*s | Height [counts] | Area %   |
|--------|---------------|------|-------------|---------------|-----------------|----------|
| 1      | 3.085         | BP   | 0.0172      | 7318.51367    | 6479.84033      | 46.57081 |
| 2      | 4.530         | PB   | 0.0296      | 8169.40381    | 4209.70801      | 51.98538 |
| 3      | 5.730         | BV   | 0.0219      | 226.89276     | 148.01051       | 1.44381  |

Totals : 1.57148e4 1.08376e4

Results obtained with enhanced integrator!

=====  
\*\*\* End of Report \*\*\*

**(g) Oxidation of a mixture of 6a and 6b in H<sub>2</sub>O with β-CD**

Temperature program: The temperature initially stayed at 100 °C for 3 min, then rose to 180 °C at the rate of 70 °C per min, and finally stayed at 180 °C for 2 min.

Concentration of internal standard: 311 ppm

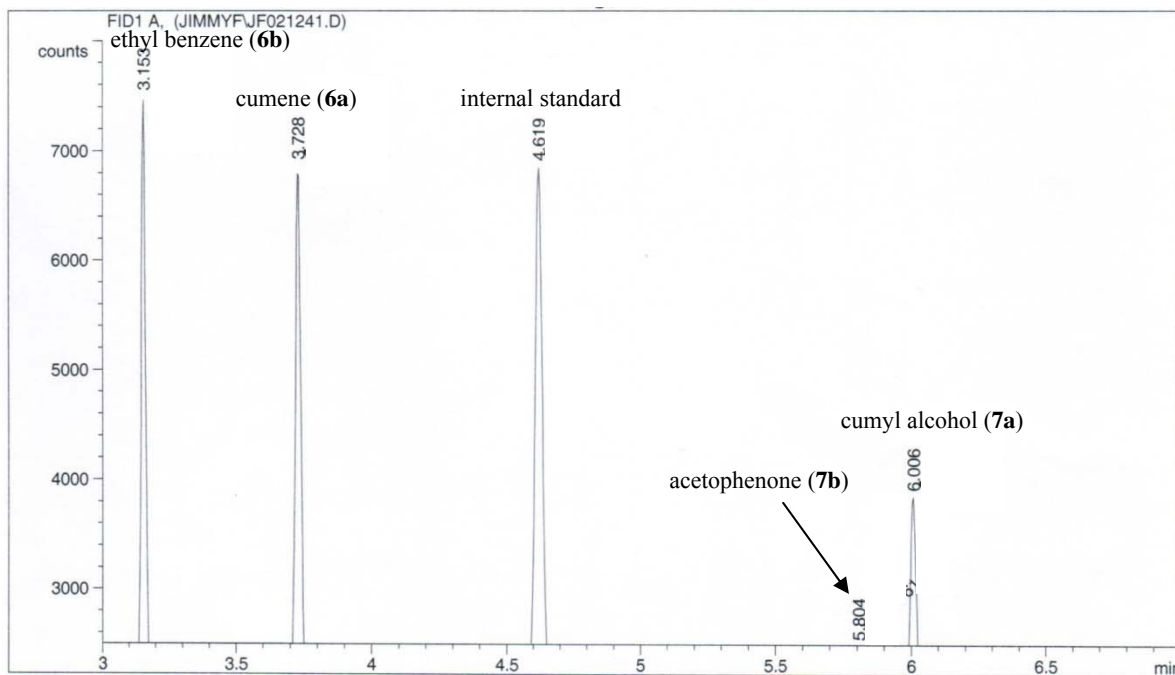

=====  
Area Percent Report  
=====

Sorted By : Signal  
Multiplier : 1.0000  
Dilution : 1.0000

Signal 1: FID1 A,

| Peak # | RetTime [min] | Type | Width [min] | Area counts*s | Height [counts] | Area %   |
|--------|---------------|------|-------------|---------------|-----------------|----------|
| 1      | 3.153         | MM   | 0.0191      | 6220.30762    | 5415.76953      | 24.50126 |
| 2      | 3.728         | MM   | 0.0241      | 6983.68750    | 4834.27930      | 27.50815 |
| 3      | 4.619         | MM   | 0.0323      | 9355.64746    | 4820.53369      | 36.85110 |
| 4      | 5.804         | MM   | 0.0236      | 161.70407     | 114.41843       | 0.63694  |
| 5      | 6.006         | MM   | 0.0249      | 2666.35620    | 1786.06433      | 10.50255 |

Totals : 2.53877e4 1.69711e4

Results obtained with enhanced integrator!

=====  
\*\*\* End of Report \*\*\*

**(h) Oxidation of a mixture of 6a and 6b in H<sub>2</sub>O/CH<sub>3</sub>CN without β-CD**

Temperature profile: The temperature initially stayed at 100 °C for 3 min, then rose to 180 °C at the rate of 70 °C per min, and finally stayed at 180 °C for 2 min.

Concentration of internal standard: 311 ppm

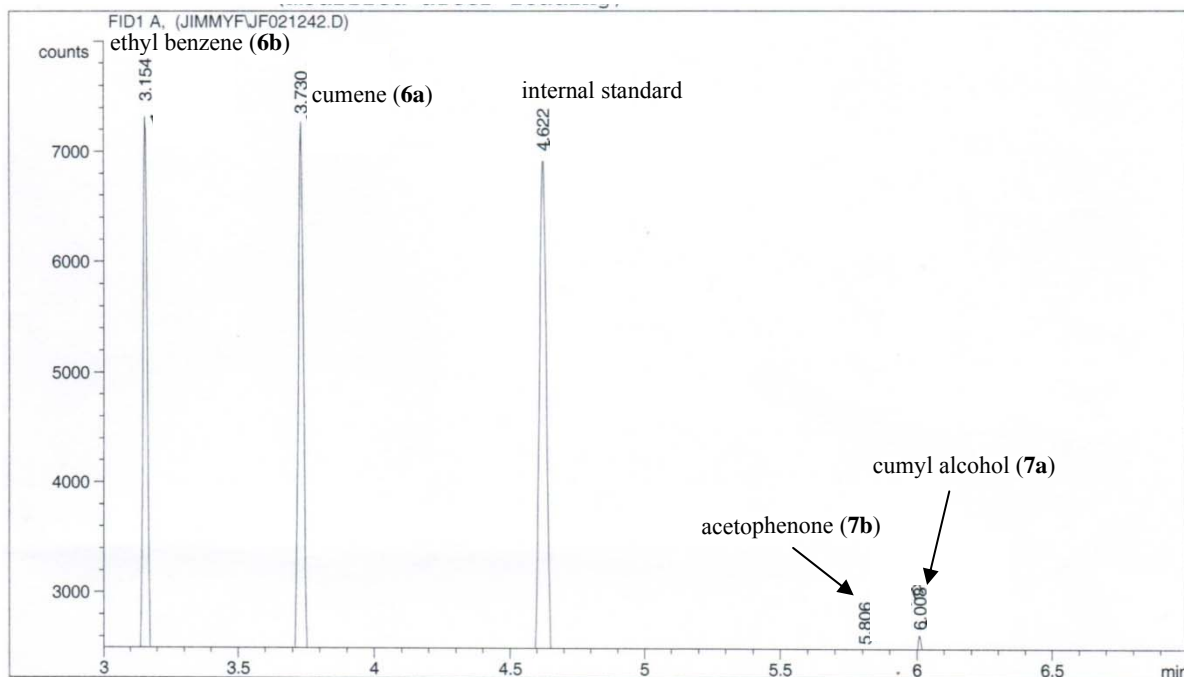

=====  
Area Percent Report  
=====

Sorted By : Signal  
Multiplier : 1.0000  
Dilution : 1.0000

Signal 1: FID1 A,

| Peak # | RetTime [min] | Type | Width [min] | Area counts*s | Height [counts] | Area %   |
|--------|---------------|------|-------------|---------------|-----------------|----------|
| 1      | 3.154         | MM   | 0.0189      | 5984.56348    | 5269.64111      | 24.83551 |
| 2      | 3.730         | MM   | 0.0238      | 7451.79248    | 5213.46387      | 30.92440 |
| 3      | 4.622         | MM   | 0.0329      | 9665.46289    | 4899.29199      | 40.11098 |
| 4      | 5.806         | MM   | 0.0211      | 177.60823     | 140.13611       | 0.73706  |
| 5      | 6.008         | MM   | 0.0260      | 817.37604     | 523.15692       | 3.39205  |

Totals : 2.40968e4 1.60457e4

Results obtained with enhanced integrator!  
=====
